# Supplementary material
Source: PubMed Central journal article supplement (PMC5839992)
Supplement: NIHMS930181-supplement-1.pdf [file NIHMS930181-supplement-1.pdf]

# Supplementary Fig. 1

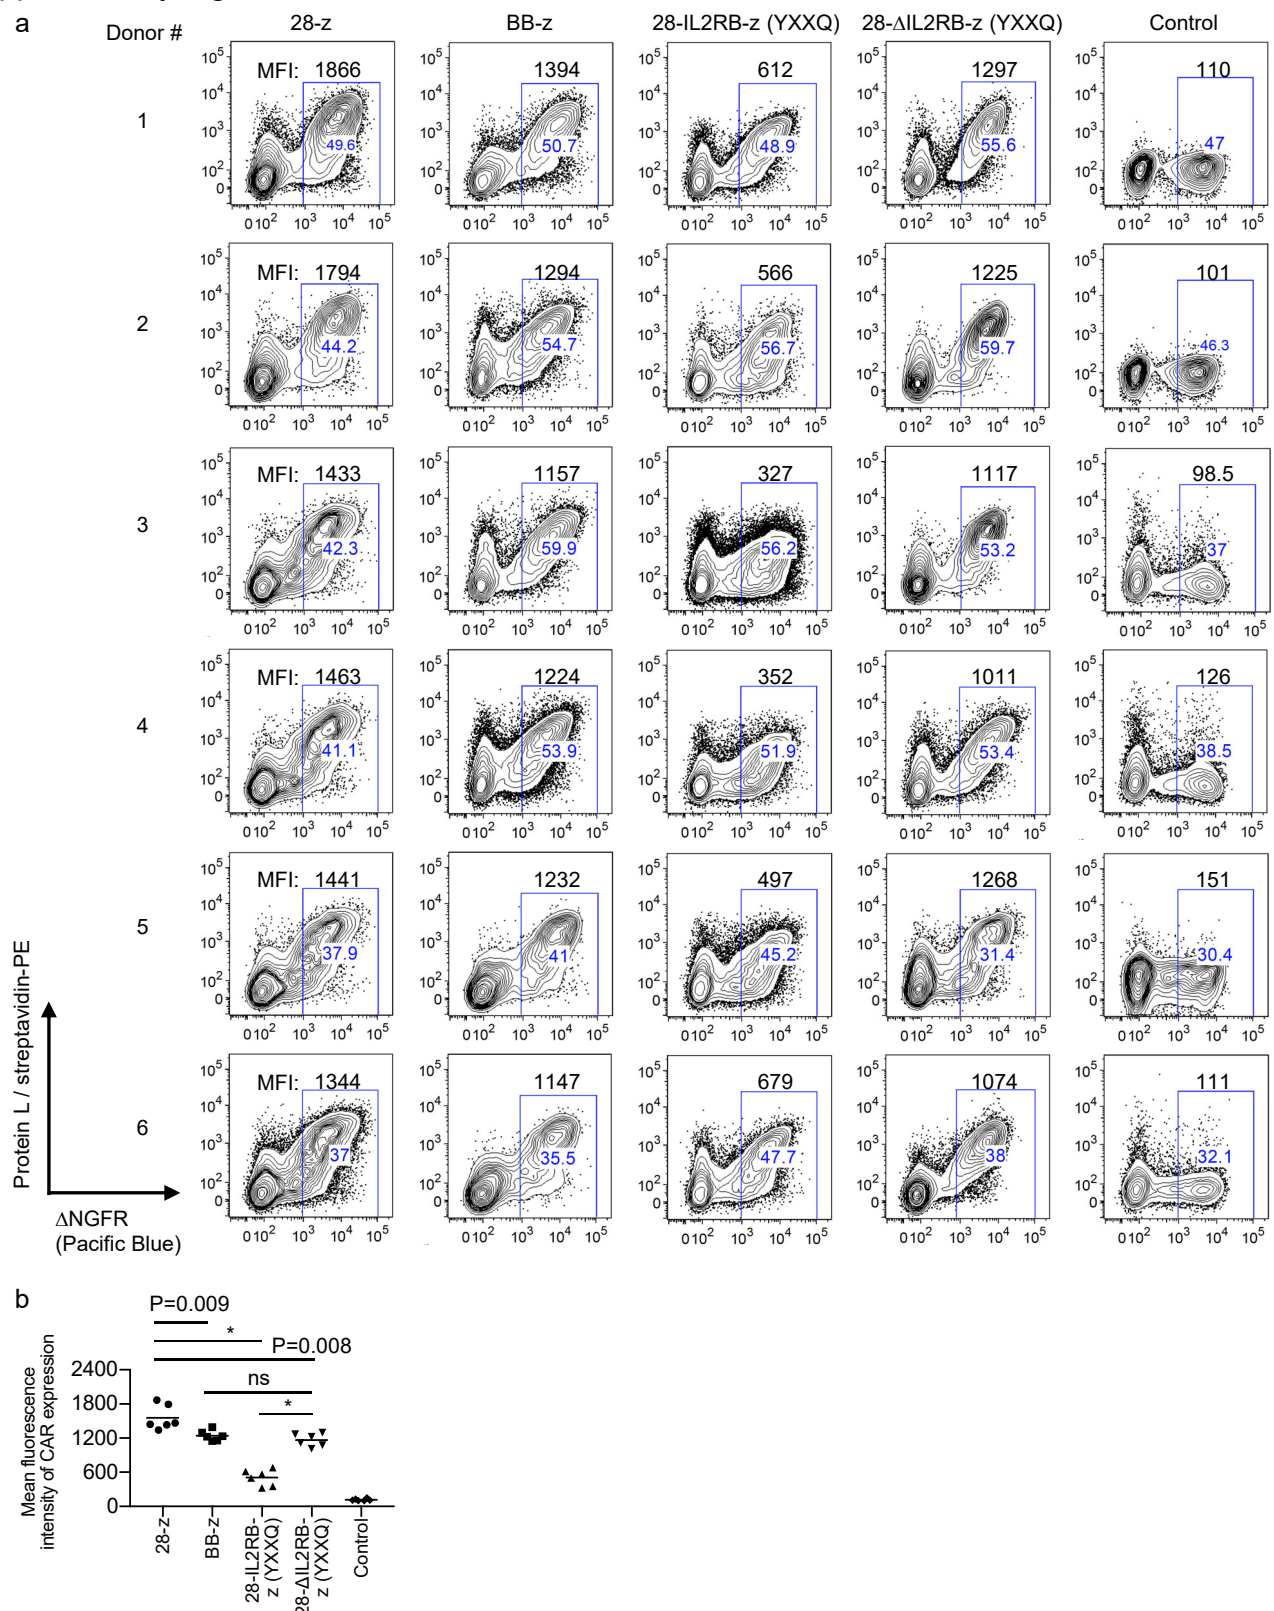

**Supplementary Fig. 1. Surface expression of CAR constructs.** (a, b) Peripheral blood CD3<sup>+</sup> T cells were individually transduced with a CAR gene linked to the truncated nerve growth factor receptor ( $\Delta$ NGFR) or control  $\Delta$ NGFR and stained with biotin-labeled protein L and streptavidin-PE to analyze the surface expression of the CARs. FACS plots obtained from six different donor-derived T cells (a) and the mean fluorescence intensity (MFI) in the CD8<sup>+</sup>  $\Delta$ NGFR<sup>+</sup> T cell population (b) are shown (n=6 different donor samples). Horizontal lines indicate mean values. The MFI among different CAR constructs was analyzed with repeated measures one-way ANOVA with Tukey's multiple comparisons test; F=101.5; degree of freedom=23). \* P<0.001, ns not significant.

## Supplementary Fig. 2

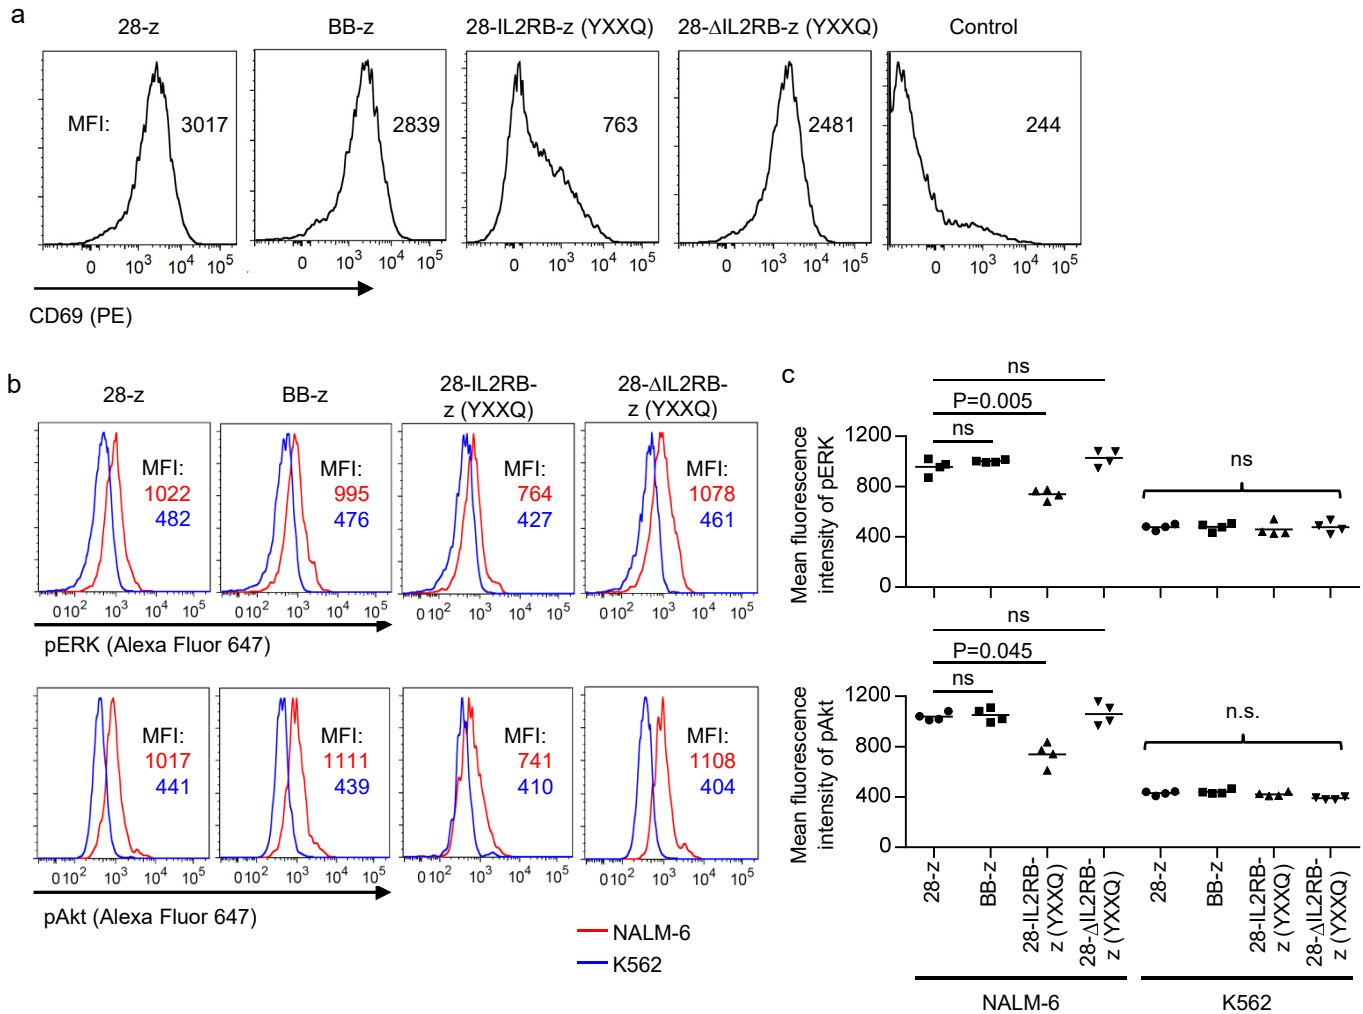

**Supplementary Fig. 2. Comparison of CAR signaling upon antigen recognition.** (a) Peripheral blood CD3<sup>+</sup> T cells were individually transduced with a CAR gene linked to the truncated nerve growth factor receptor ( $\Delta$ NGFR) or control  $\Delta$ NGFR. CD69 expression in the CAR-transduced T cells was analyzed 24 hours after stimulation with the CD19<sup>+</sup> cell line NALM-6. Representative FACS plots of three experiments are shown. (b, c) T cells transduced with the indicated CAR genes were stimulated with NALM-6 (CD19<sup>+</sup>) or K562 (CD19<sup>-</sup>) for 2 hours after resting overnight in cytokine-free media. Phosphorylated ERK and Akt within the CD8<sup>+</sup>  $\Delta$ NGFR<sup>+</sup> T cell population were analyzed with intracellular flow cytometry. Representative FACS plots (d) and the MFI (e) within the CD8<sup>+</sup>  $\Delta$ NGFR<sup>+</sup> T cell population are shown (n=4 different donor samples; repeated measures one-way ANOVA with Tukey's multiple comparisons test; F=35.54 for pERK and F=25.86 for pAkt; degree of freedom=15 for each comparison). Horizontal lines represent mean values. ns, not significant.

### Supplementary Fig. 3

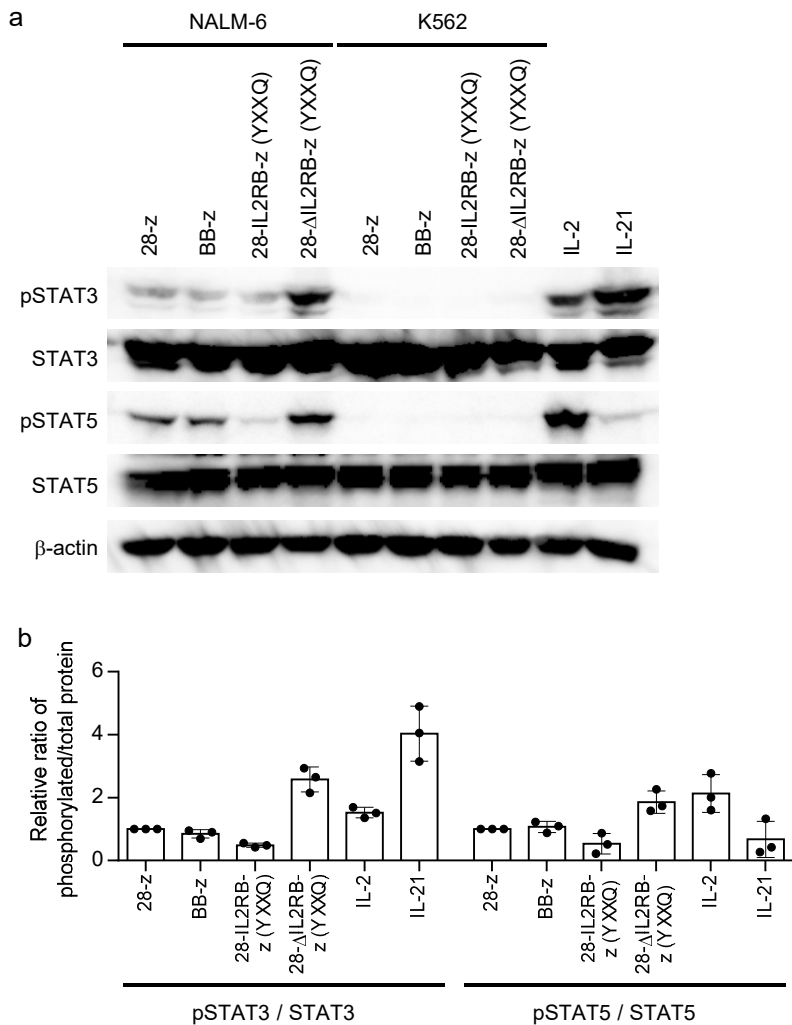

**Supplementary Fig. 3. JAK-STAT signaling induced by CAR-T cells.** (a, b) T cells transduced with the indicated CAR genes shown in Fig. 1a were stimulated with NALM-6 or K562 after resting in cytokine-free media overnight. The  $\Delta$ NGFR<sup>+</sup> T cells were isolated 2 hours after stimulation, and phosphorylated or total STAT3/STAT5 was detected by immunoblotting. T cells mock-transduced and treated with IL-2 (300 IU/ml) or IL-21 (50 ng/ml) for 30 minutes were used as a control. Representative blots of three independent experiments (a) and the quantified band intensity (b) are shown. The ratio of phosphorylated to total proteins was calculated and normalized to that of the 28-z CAR-T cells stimulated with NALM-6 (n=3). Horizontal lines indicate mean values  $\pm$  s.d.

### Supplementary Fig. 4

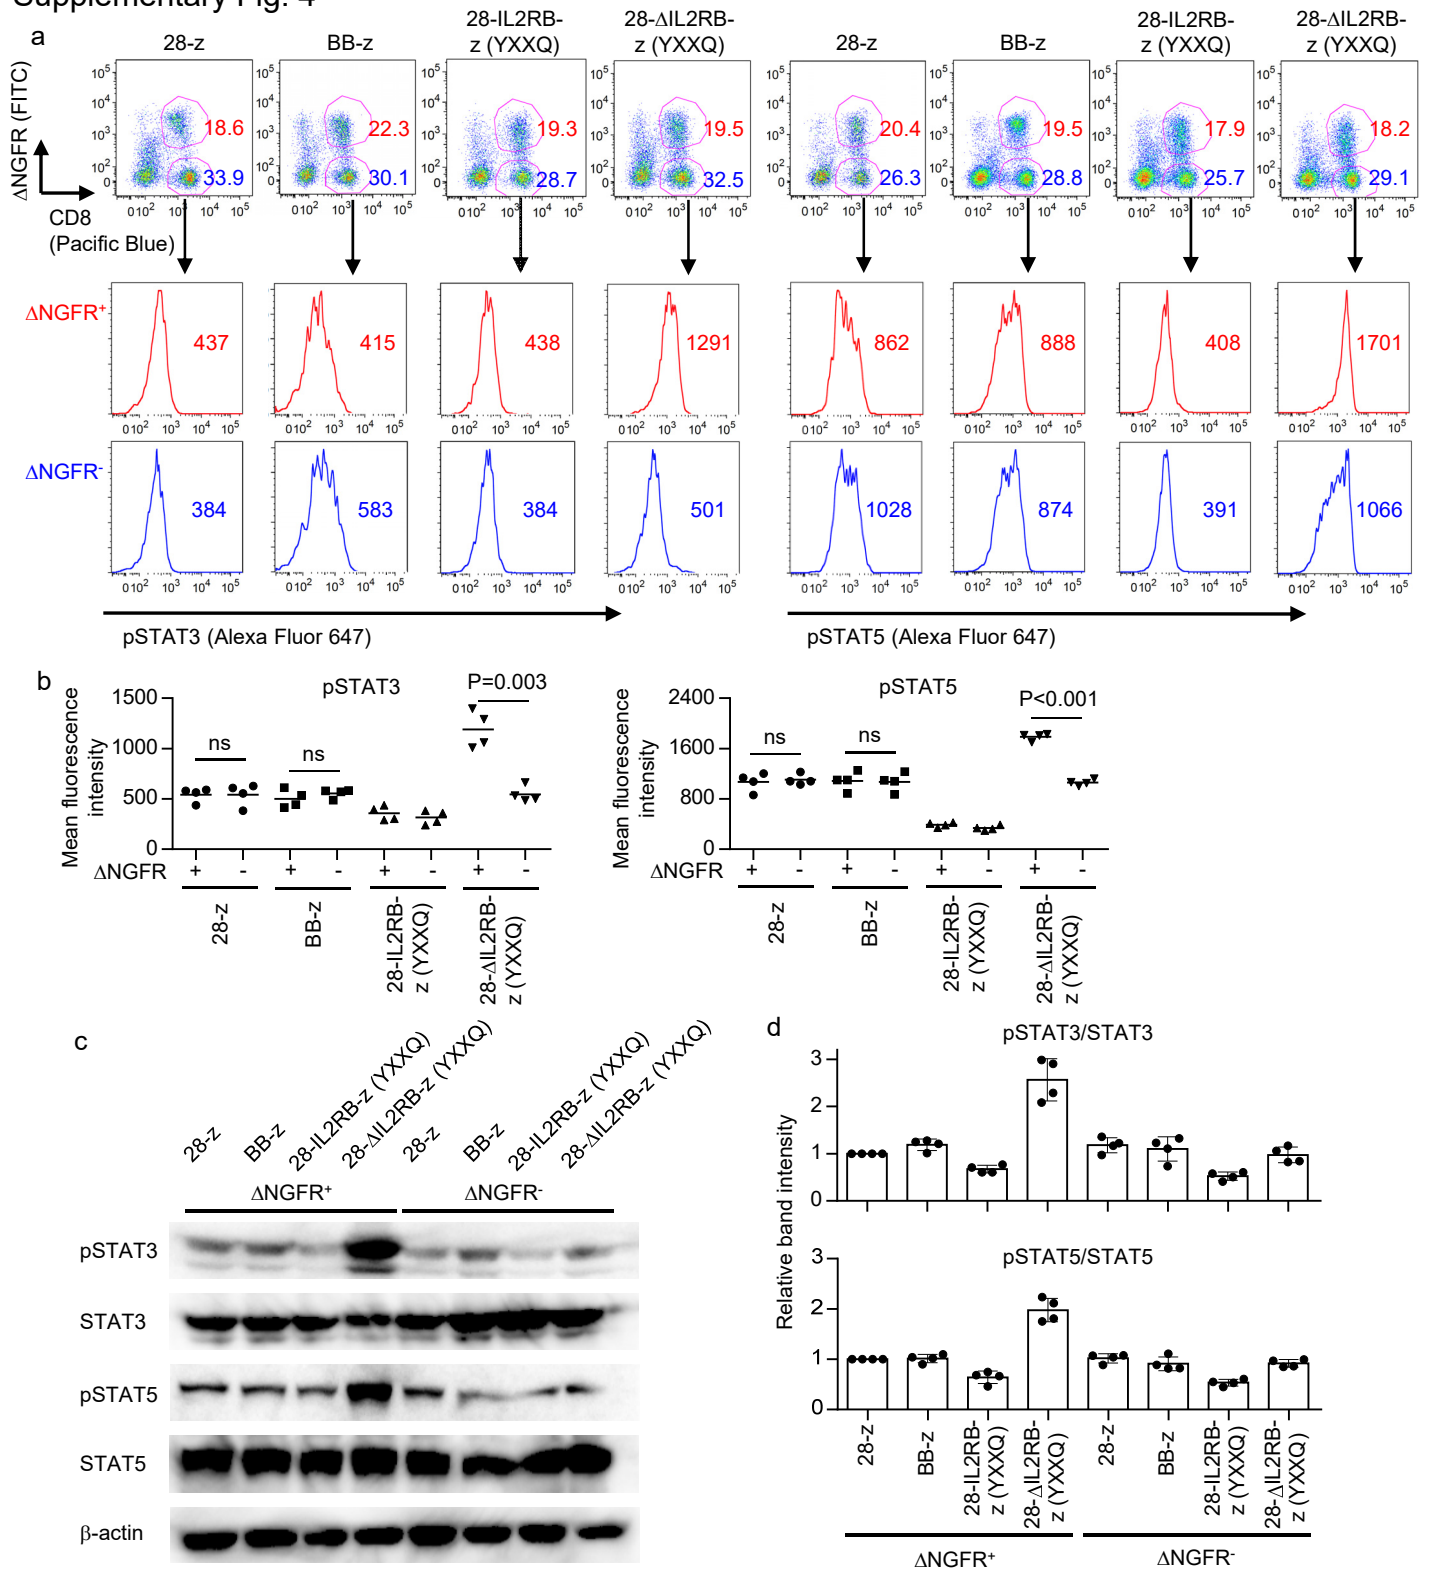

**Supplementary Fig. 4. JAK-STAT pathway activation in CAR<sup>+</sup> and CAR<sup>-</sup> T cells.** (a-d) CAR-T cells were stimulated with NALM-6 after resting overnight in cytokine-free media. The phosphorylation of STAT3 and STAT5 was analyzed 2 hours after stimulation by flow cytometry (a and b) and immunoblotting (c and d). (a) Representative FACS plots from the samples presented in Fig. 1b. (b) Mean fluorescence intensity of individual samples (n=4; paired two-tailed *t*-test; *t*=0.02 for 28-z-pSTAT3, *t*=1.29 for BB-z-pSTAT3, *t*=8.97 for 28-ΔIL2RB-z (YXXQ)-pSTAT3, *t*=0.74 for 28-z-pSTAT5, *t*=4.61 for BB-z-pSTAT5, *t*=17.99 for 28-ΔIL2RB-z (YXXQ)-pSTAT5, degree of freedom=3). Horizontal lines indicate mean values. For immunoblotting, ΔNGFR<sup>±</sup>-CD8<sup>+</sup> T cells were isolated after stimulation by flow cytometry. Representative blots of four experiments (c) and the quantified band intensity normalized to that in 28-z CAR-T cells (d) are shown. Horizontal lines indicate mean values ± s.d. ns, not significant.



## Supplementary Fig. 5

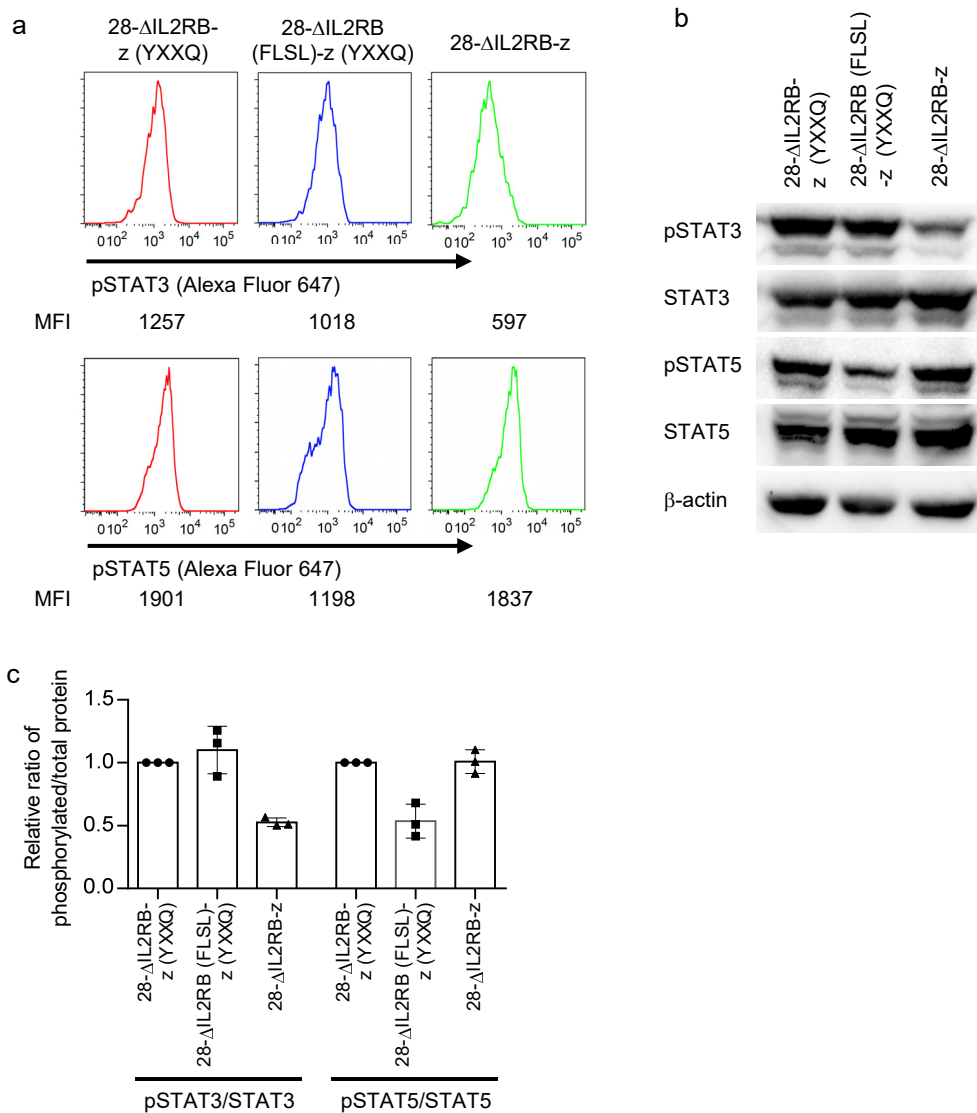

**Supplementary Fig. 5. Differential roles of tyrosine residues in inducing STAT3 and STAT5 phosphorylation.** (a-c) T cells transduced with the indicated CARs were stimulated with NALM-6. The phosphorylation levels of STAT3 and STAT5 were analyzed 2 hours after stimulation by intracellular flow cytometry (a) or immunoblotting (b and c). Immunoblotting was performed three times, and the quantified band intensity normalized to that of the 28-ΔIL2RB-z (YXXQ) CAR-T cells is shown (c). Horizontal lines indicate mean values  $\pm$  s.d.

## Supplementary Fig. 6

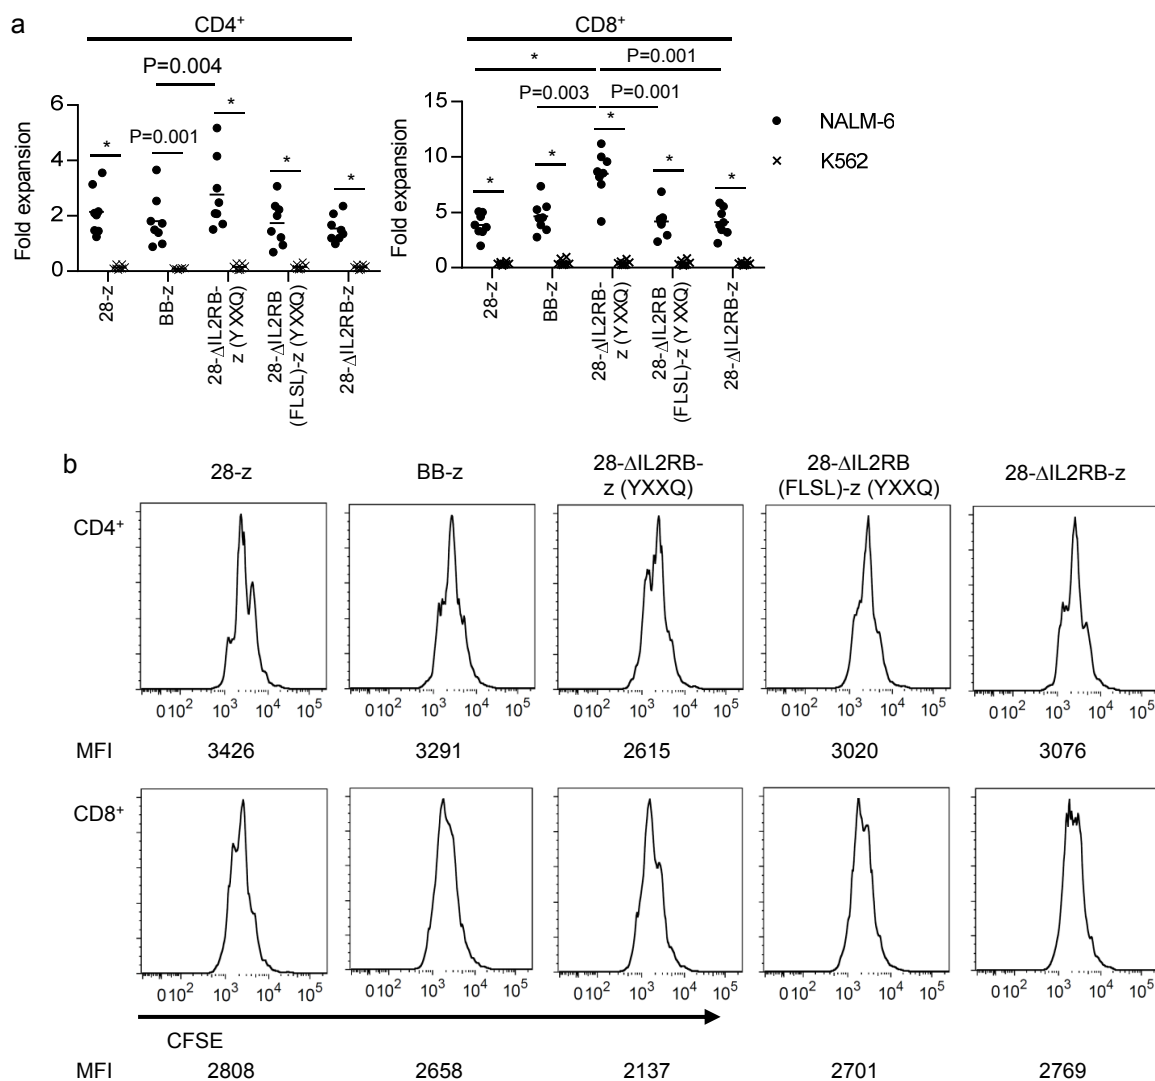

**Supplementary Fig. 6. Proliferation of CAR-T cells.** (a) T cells transduced with the indicated CAR genes were stimulated with NALM-6 or K562 and cultured in the absence of exogenous cytokines. Fold expansion of the CAR-T cells within CD4<sup>+</sup> or CD8<sup>+</sup> T cell population was analyzed 7 days after stimulation (n=8 different donor samples; repeated measures one-way ANOVA with Tukey's multiple comparisons test for the NALM-6 data,  $F=4.47$  for CD4<sup>+</sup> T cells,  $F=30.84$  for CD8<sup>+</sup> T cells, degree of freedom=39; two-tailed paired *t*-test for comparison between the NALM-6 and K562 data in the individual CAR-T cells,  $t=6.79$  (CD4<sup>+</sup>-28-z),  $t=5.32$  (CD4<sup>+</sup>-BB-z),  $t=5.97$  (CD4<sup>+</sup>-28- $\Delta$ IL2RB-z (YXXQ)),  $t=5.58$  (CD4<sup>+</sup>-28- $\Delta$ IL2RB (FLSL)-z (YXXQ)),  $t=8.29$  (CD4<sup>+</sup>-28- $\Delta$ IL2RB-z),  $t=8.73$  (CD8<sup>+</sup>-28-z),  $t=7.36$  (CD8<sup>+</sup>-BB-z),  $t=10.08$  (CD8<sup>+</sup>-28- $\Delta$ IL2RB-z (YXXQ)),  $t=7.45$  (CD8<sup>+</sup>-28- $\Delta$ IL2RB (FLSL)-z (YXXQ)),  $t=7.93$  (CD8<sup>+</sup>-28- $\Delta$ IL2RB-z), degree of freedom=7). Horizontal lines denote mean values. \*  $P<0.001$ . (b) CAR-T cells were labeled with carboxyfluorescein succinimidyl ester (CFSE) and stimulated with NALM-6. CFSE dilution within CD4<sup>+</sup>/CD8<sup>+</sup>  $\Delta$ NGFR<sup>+</sup> T cell population was analyzed three days after the stimulation. Representative FACS plots of four samples are shown.

## Supplementary Fig. 7

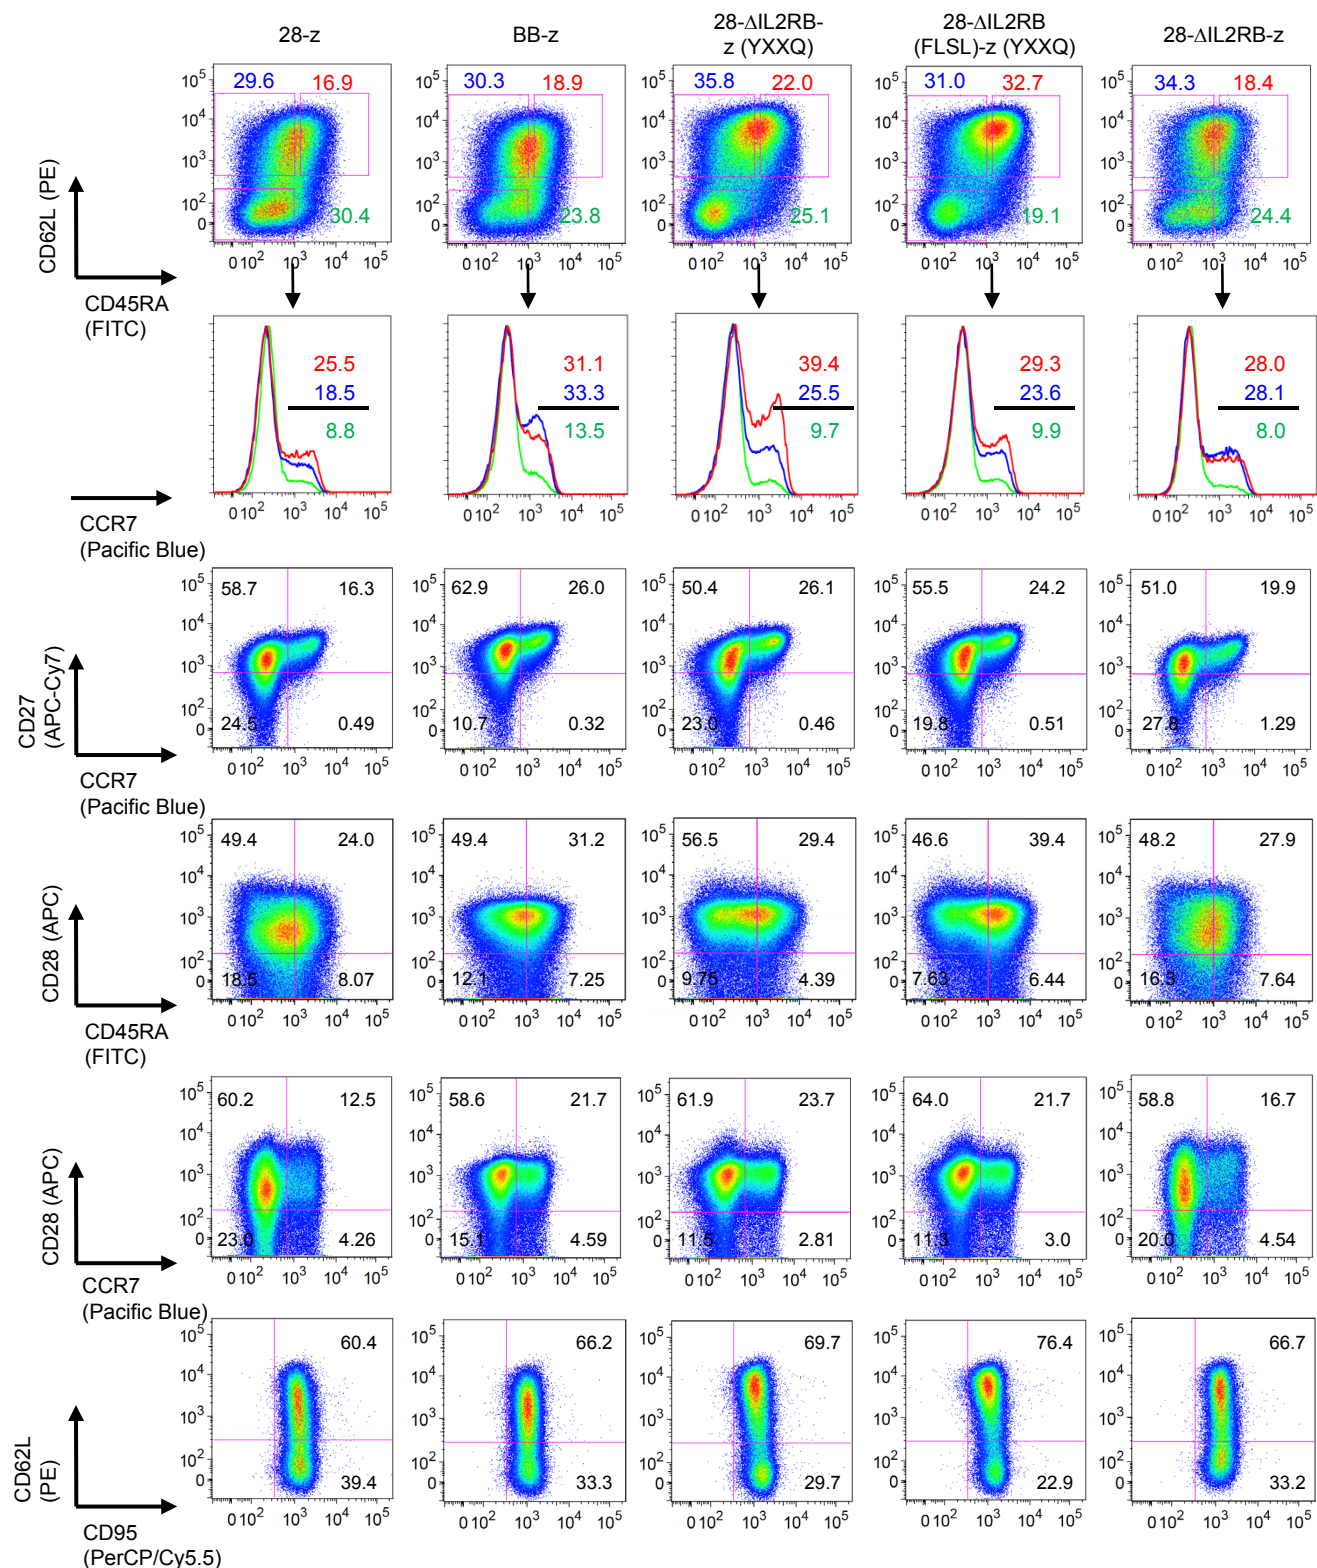

**Supplementary Fig. 7. Expression of memory T cell markers in the CAR-transduced T cells.** The expression of CD45RA, CD62L, CCR7, CD27, CD28 and CD95 was analyzed in the CAR-transduced CD8<sup>+</sup> T cells 7 days after stimulation with NALM-6. Representative FACS plots of the nine different donor samples presented in Fig. 2d are shown.

## Supplementary Fig. 8

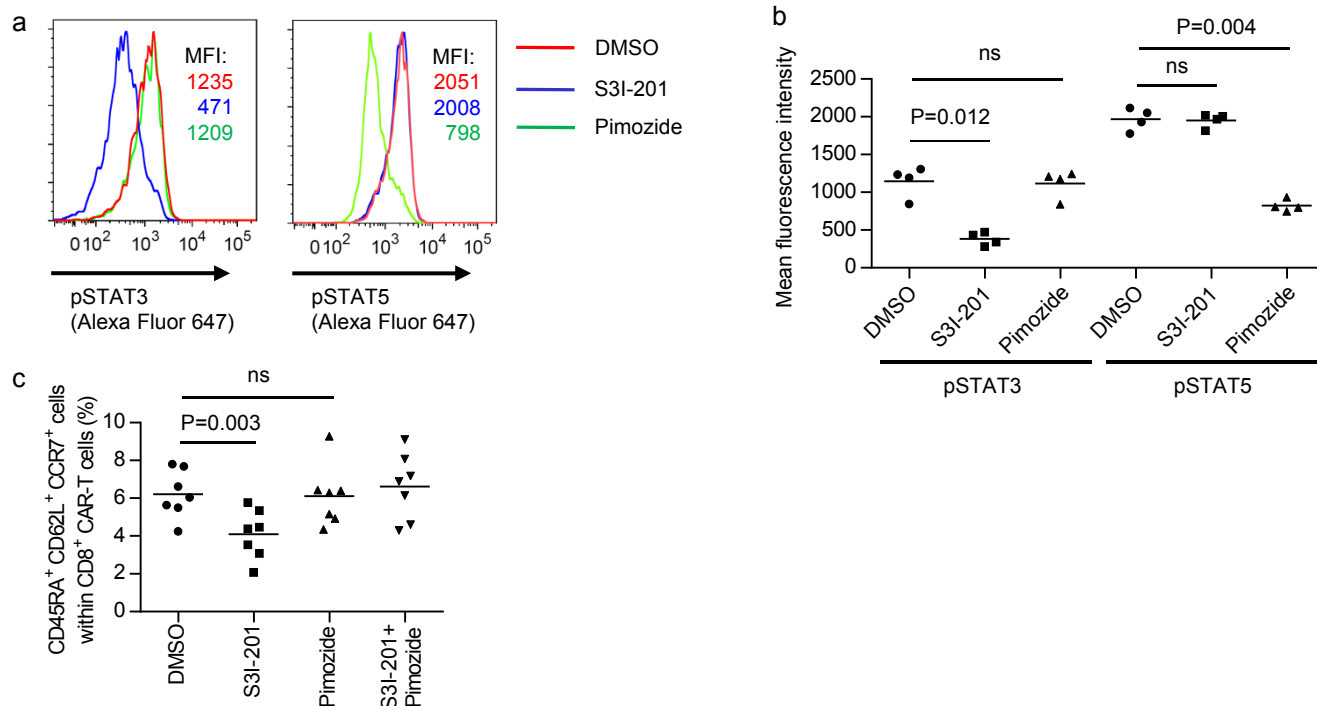

**Supplementary Fig. 8. Specific inhibition of STAT3 and STAT5 phosphorylation.** (a, b) The 28- $\Delta$ IL2RB-z (YXXQ) CAR-T cells were stimulated with NALM-6 in the presence or absence of 25  $\mu$ M of S3I-201 or 5  $\mu$ M of pimozide and were analyzed for the phosphorylation of STAT3 and STAT5 in the CD8<sup>+</sup>  $\Delta$ NGFR<sup>+</sup> T cell population 120 minutes after the stimulation. Representative FACS plots (a) and mean fluorescence intensity of pSTAT3 and pSTAT5 are shown (b, n=4 different donor samples; repeated measures one-way ANOVA with Tukey's multiple comparisons test; F=54.54 for pSTAT3 and F=115.8 for pSTAT5; degree of freedom=11). (c) The 28- $\Delta$ IL2RB-z (YXXQ) CAR-transduced T cells were stimulated with NALM-6 and were treated with 25  $\mu$ M of S3I-201 and/or 5  $\mu$ M of pimozide for three days. The frequency of CD45RA<sup>+</sup> CD62L<sup>+</sup> CCR7<sup>+</sup> cells within the CD8<sup>+</sup>  $\Delta$ NGFR<sup>+</sup> T cell population was analyzed on day 7 (n=7 different donor samples, repeated measures one-way ANOVA with Tukey's multiple comparisons test against the DMSO control; F=7.71; degree of freedom=27). In **b** and **c**, horizontal lines indicate mean values. ns, not significant.

Supplementary Fig. 9

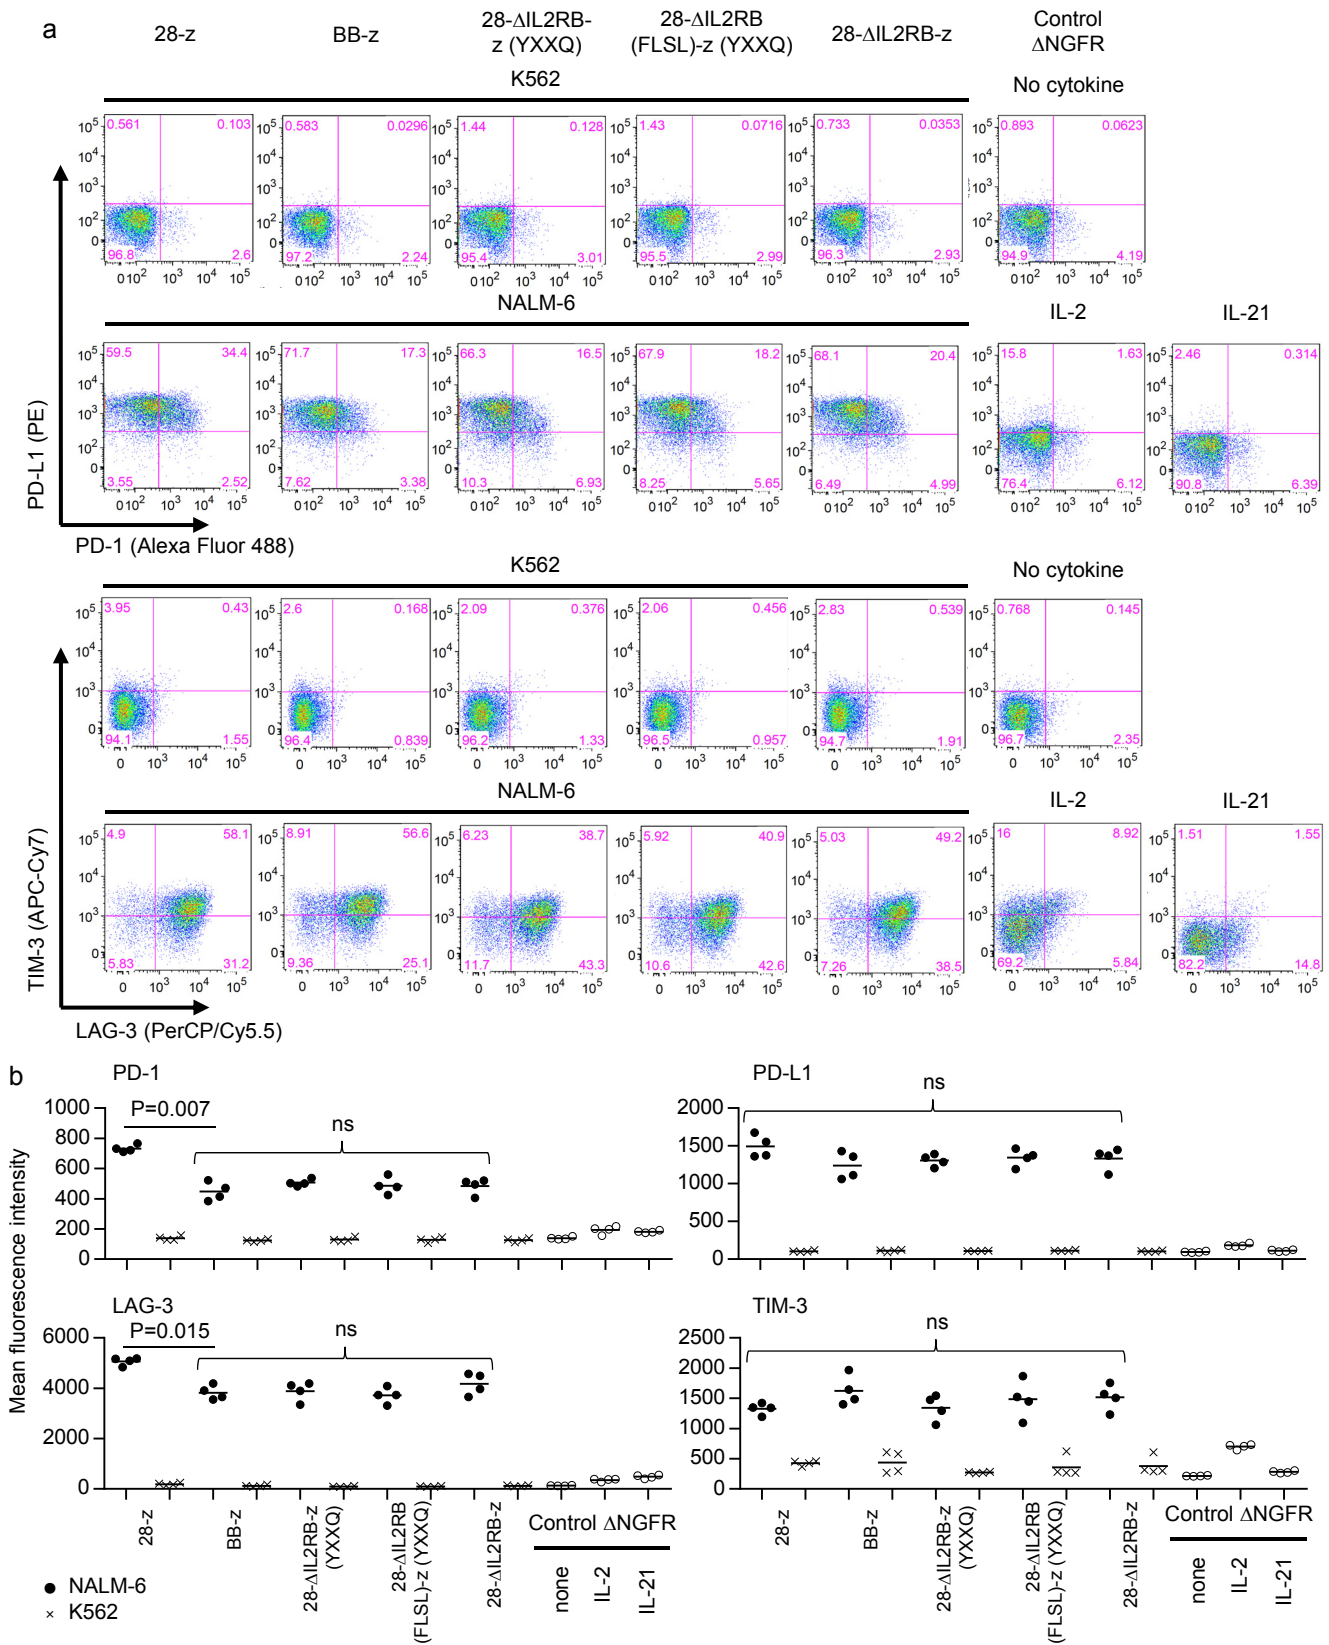

**Supplementary Fig. 9. Expression of immunoinhibitory molecules in CAR-T cells upon antigen stimulation.** The indicated CAR-T cells were cocultured with NALM-6 or K562, or T cells transduced with the control  $\Delta$ NGFR were treated with IL-2 (300 IU/ml) or IL-21 (50 ng/ml). The expression of PD-1, PD-L1, LAG-3 and TIM-3 was analyzed 24 hours later. Representative FACS plots (a) and the mean fluorescence intensity (b) are shown (n=4; repeated measures one-way ANOVA with Tukey's multiple comparisons test for the data for activated CAR-T cells; F=22.8 for PD-1, F=1.52 for PD-L1, F=16.66 for LAG-3, F=2.28 for TIM-3; degree of freedom=19). ns, not significant. Horizontal lines indicate mean values.



## Supplementary Fig. 10

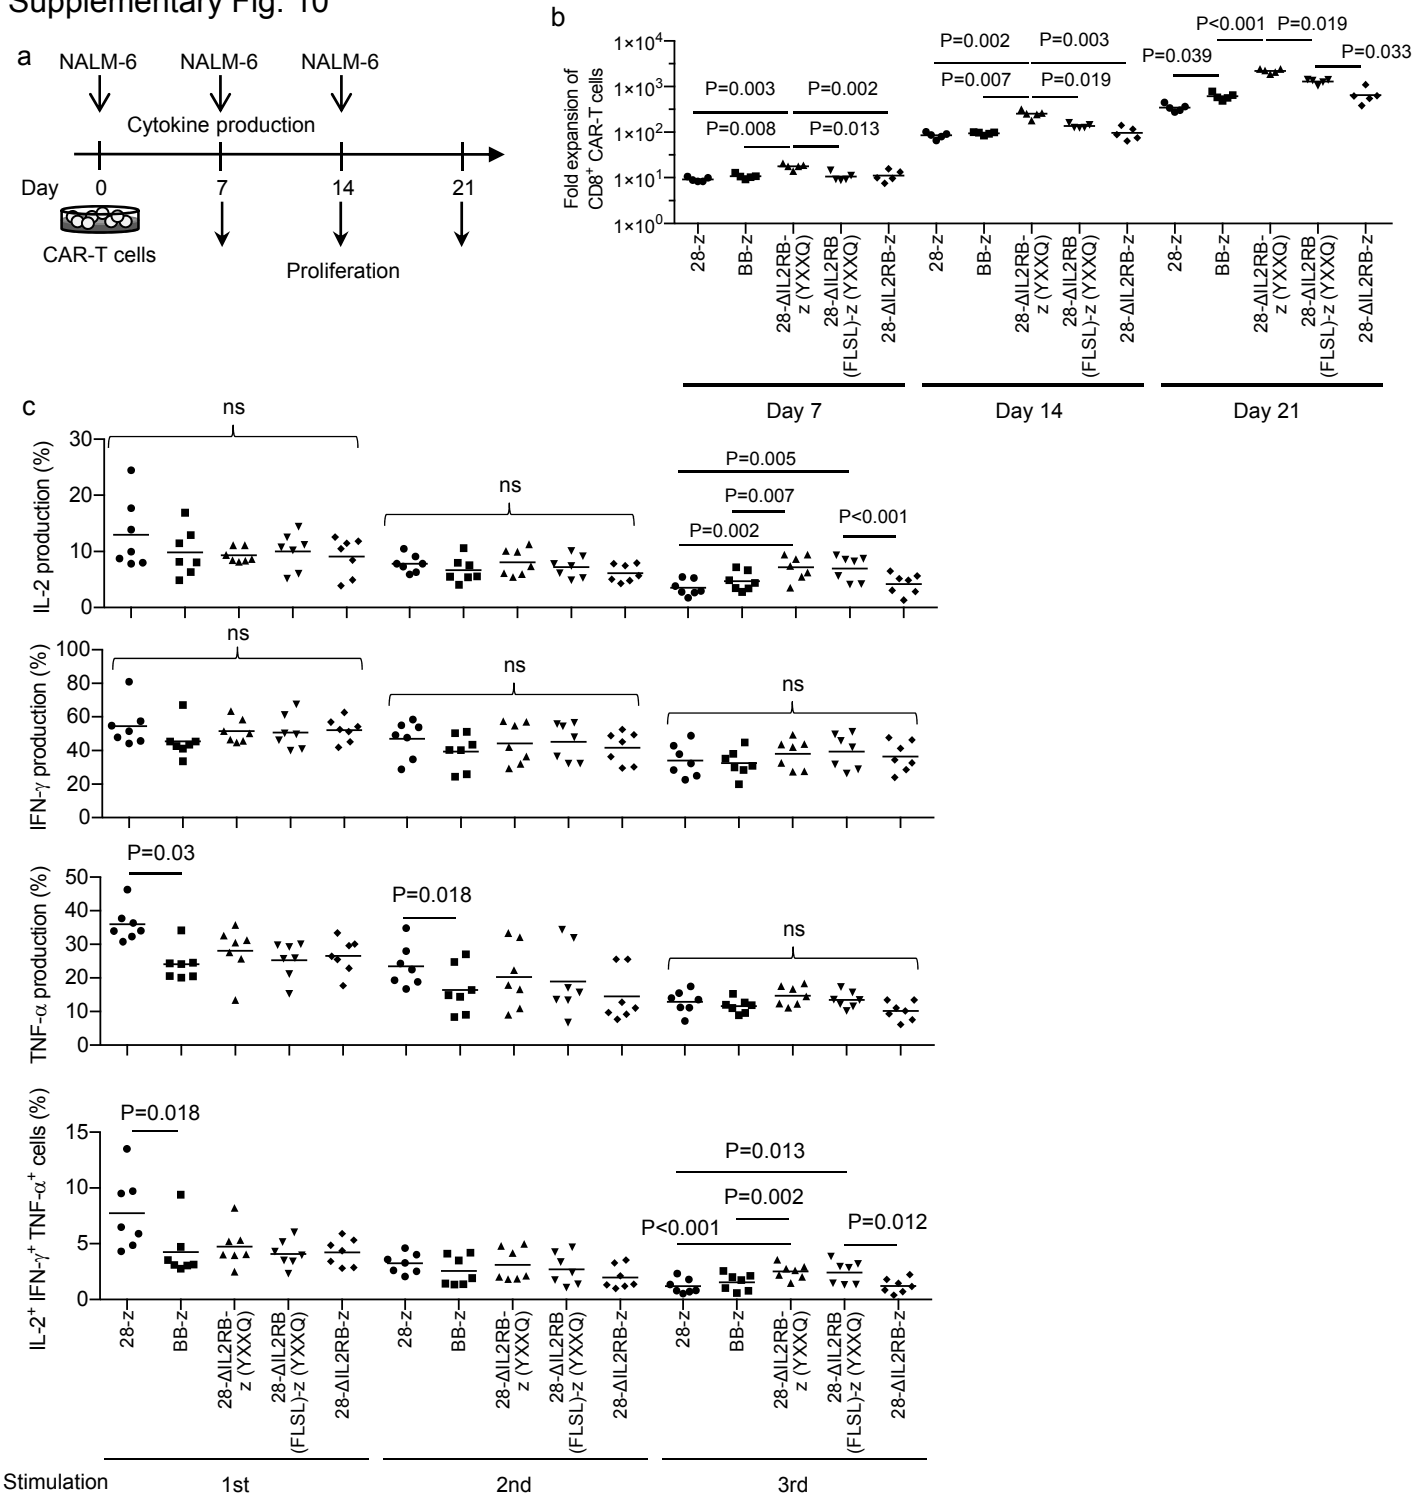

**Supplementary Fig. 10. Proliferation and cytokine production in the CAR-transduced T cells upon repeated antigen stimulation.** (a-c) The CAR-transduced T cells were stimulated weekly with NALM-6 (a). The fold expansion of the CD8<sup>+</sup> CAR-T cells at 7, 14 and 21 days after the initial stimulation was calculated (b; n=5 different donor samples, repeated measures one-way ANOVA with Tukey's multiple comparisons test; F=26.41 for Day 7, F=52.27 for Day 14, F=83.83 for Day 21; degree of freedom=24). (c) The production of IL-2, IFN- $\gamma$  and TNF- $\alpha$  was analyzed by intracellular flow cytometry after each stimulation. The frequency of the cells producing individual cytokines and those positive for all cytokines within the CD8<sup>+</sup>  $\Delta$ NGFR<sup>+</sup> T cell population are shown (n=7 different donor samples, repeated measures one-way ANOVA with Tukey's multiple comparisons test for each round of stimulation; F=2.10 (IL-2-1st), 2.57 (IL-2-2nd), 27.04 (IL-2-3rd), 2.54 (IFN- $\gamma$ -1st), 2.57 (IFN- $\gamma$ -2nd), 2.66 (IFN- $\gamma$ -3rd), 6.95 (TNF- $\alpha$ -1st), 7.17 (TNF- $\alpha$ -2nd), 3.09 (TNF- $\alpha$ -3rd), 4.44 (IL-2<sup>+</sup> IFN- $\gamma$ <sup>+</sup> TNF- $\alpha$ <sup>+</sup>-1st), 4.87 (IL-2<sup>+</sup> IFN- $\gamma$ <sup>+</sup> TNF- $\alpha$ <sup>+</sup>-2nd), 24.71 (IL-2<sup>+</sup> IFN- $\gamma$ <sup>+</sup> TNF- $\alpha$ <sup>+</sup>-3rd); degree of freedom=34). ns, not significant. Horizontal lines indicate mean values.

## Supplementary Fig. 11

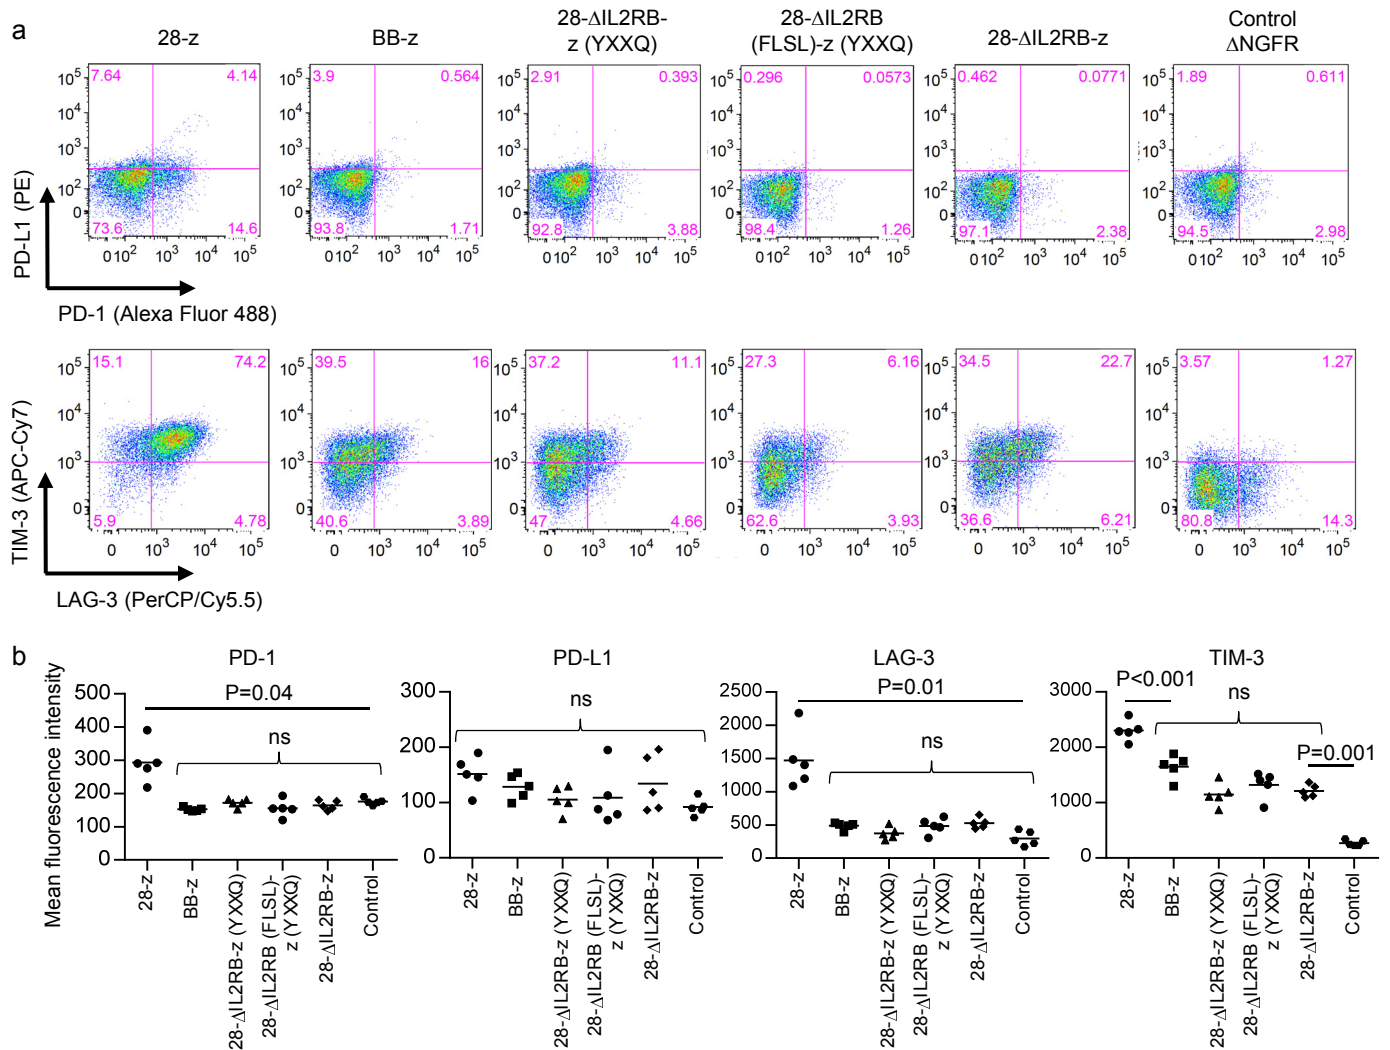

**Supplementary Fig. 11. Expression profiles of exhaustion markers in CAR-T cells after repeated antigen stimulation.** (a, b) CAR-T cells were stimulated weekly with NALM-6. Expression profiles of PD-1, PD-L1, LAG-3 and TIM-3 in CD8<sup>+</sup> CAR-T cells 7 days after the third stimulation were analyzed by flow cytometry. Representative FACS plots (a) and mean fluorescence intensity (b) are shown (n=5 different donor samples, repeated measures one-way ANOVA with Tukey's multiple comparisons test; F=16.17 for PD-1, F=2.97 for PD-L1, F=31.35 for LAG-3, F=56.36 for TIM-3; degree of freedom=29). ns, not significant. Horizontal lines indicate mean values.

# Supplementary Fig. 12

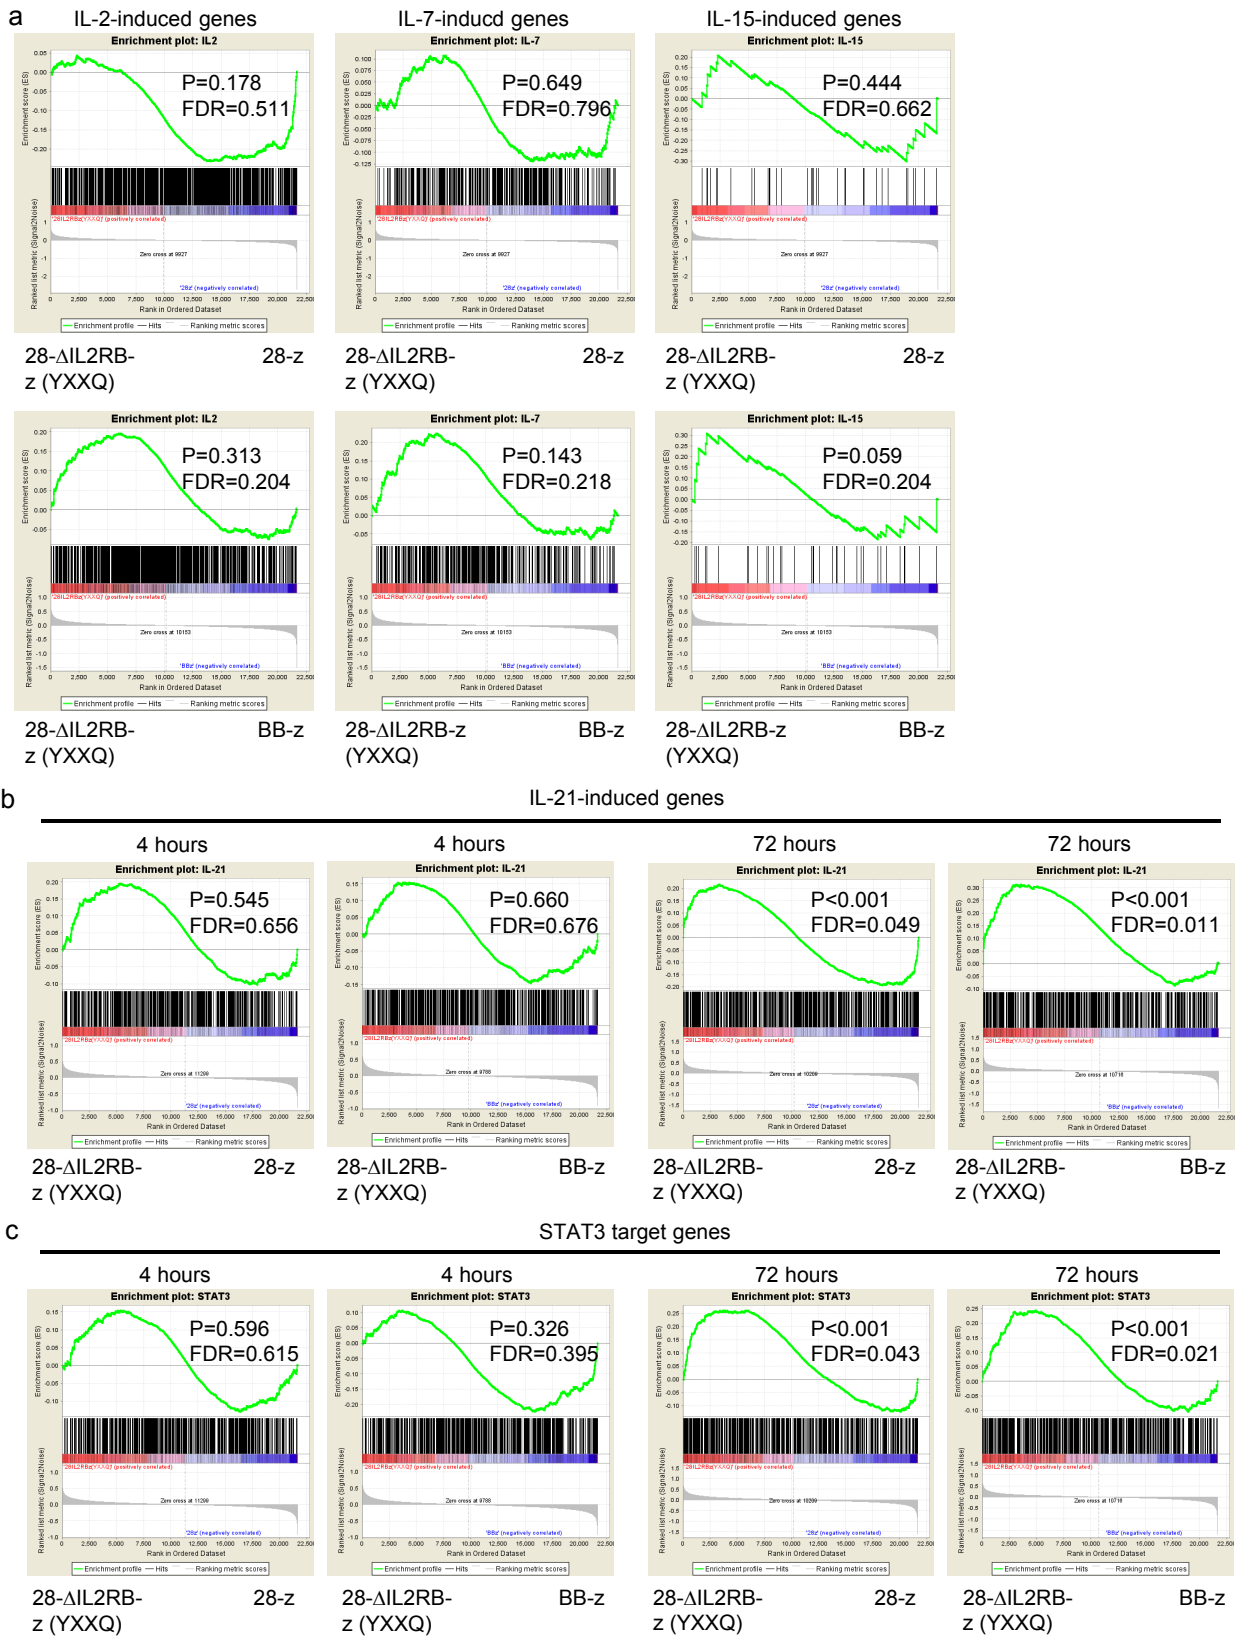

**Supplementary Fig. 12. Gene expression profiles of the stimulated CAR-T cells.** (a) Gene set enrichment analysis (GSEA) comparing the expression profiles of the 28-ΔIL2RB-z CAR-T cells versus the 28-z or BB-z CAR-T cells stimulated with NALM-6 for 24 hours (n=4 different donor samples for each group). Genes induced by IL-2, IL-7 or IL-15 treatment were used as the gene sets. (b, c) GSEA of IL-21-induced gene (b) and STAT3 target genes (c) comparing 28-ΔIL2RB-z CAR-T cells and 28-z/BB-z CAR-T cells stimulated for 4 or 72 hours. A nominal P value for enrichment was calculated by a permutation test, and a false discovery rate (FDR) was calculated to adjust for multiple hypothesis testing.

Supplementary Fig. 13

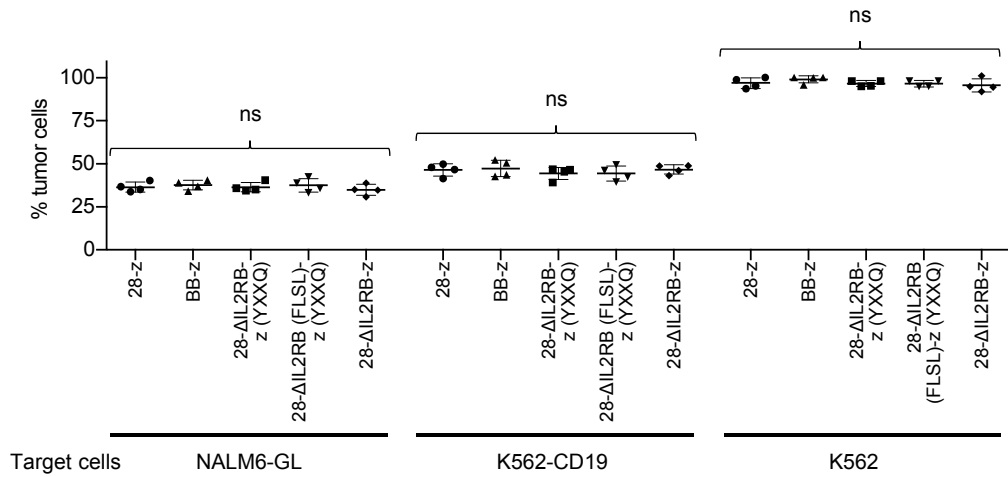

**Supplementary Fig. 13. Cytotoxic activity of CAR-T cells.** The CAR-transduced T cells were cocultured with the indicated target cells at a ratio of 1:1. The frequency of the residual target cells was determined by flow cytometry (n=4 technical replicates; ordinary one-way ANOVA with Tukey's multiple comparisons test for each target cell; F=0.48 for NALM6-GL, 0.49 for K562-CD19, 0.90 for K562; degree of freedom=19). ns, not significant. Horizontal lines indicate mean values  $\pm$  s.d.

# Supplementary Fig. 14

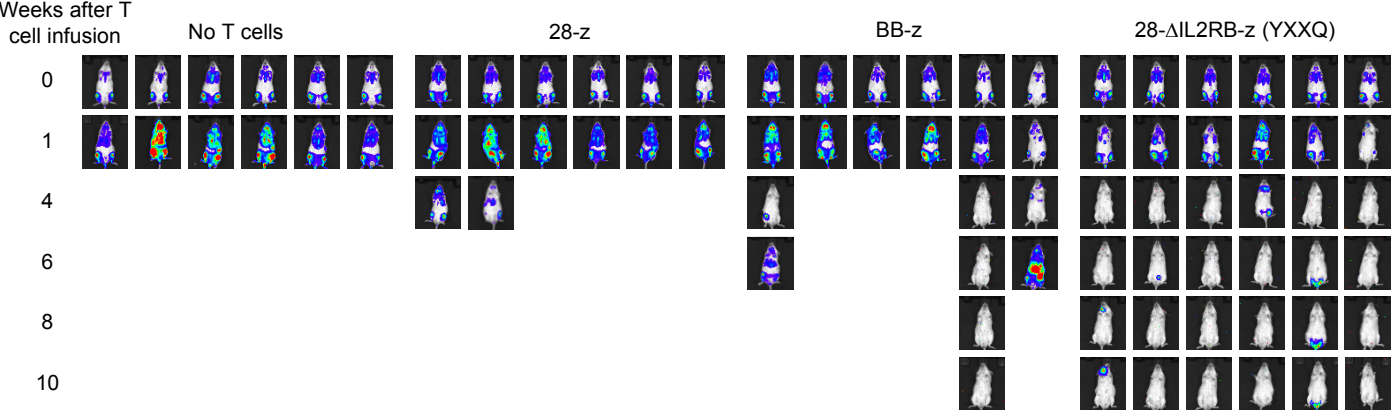

**Supplementary Fig. 14. Antileukemic effects of the CAR-T cells *in vivo*.** NOD-scid IL2 $\gamma$ <sup>null</sup> (NSG) mice were intravenously injected with the CD19<sup>+</sup> leukemia cell line NALM-6 transduced with EGFP-luciferase (NALM6-GL) and were treated with 5x10<sup>6</sup> CAR-T cells 14 days later. *In vivo* bioluminescent imaging of luciferase activity following the infusion of the CAR-T cells is shown.



## Supplementary Fig. 15

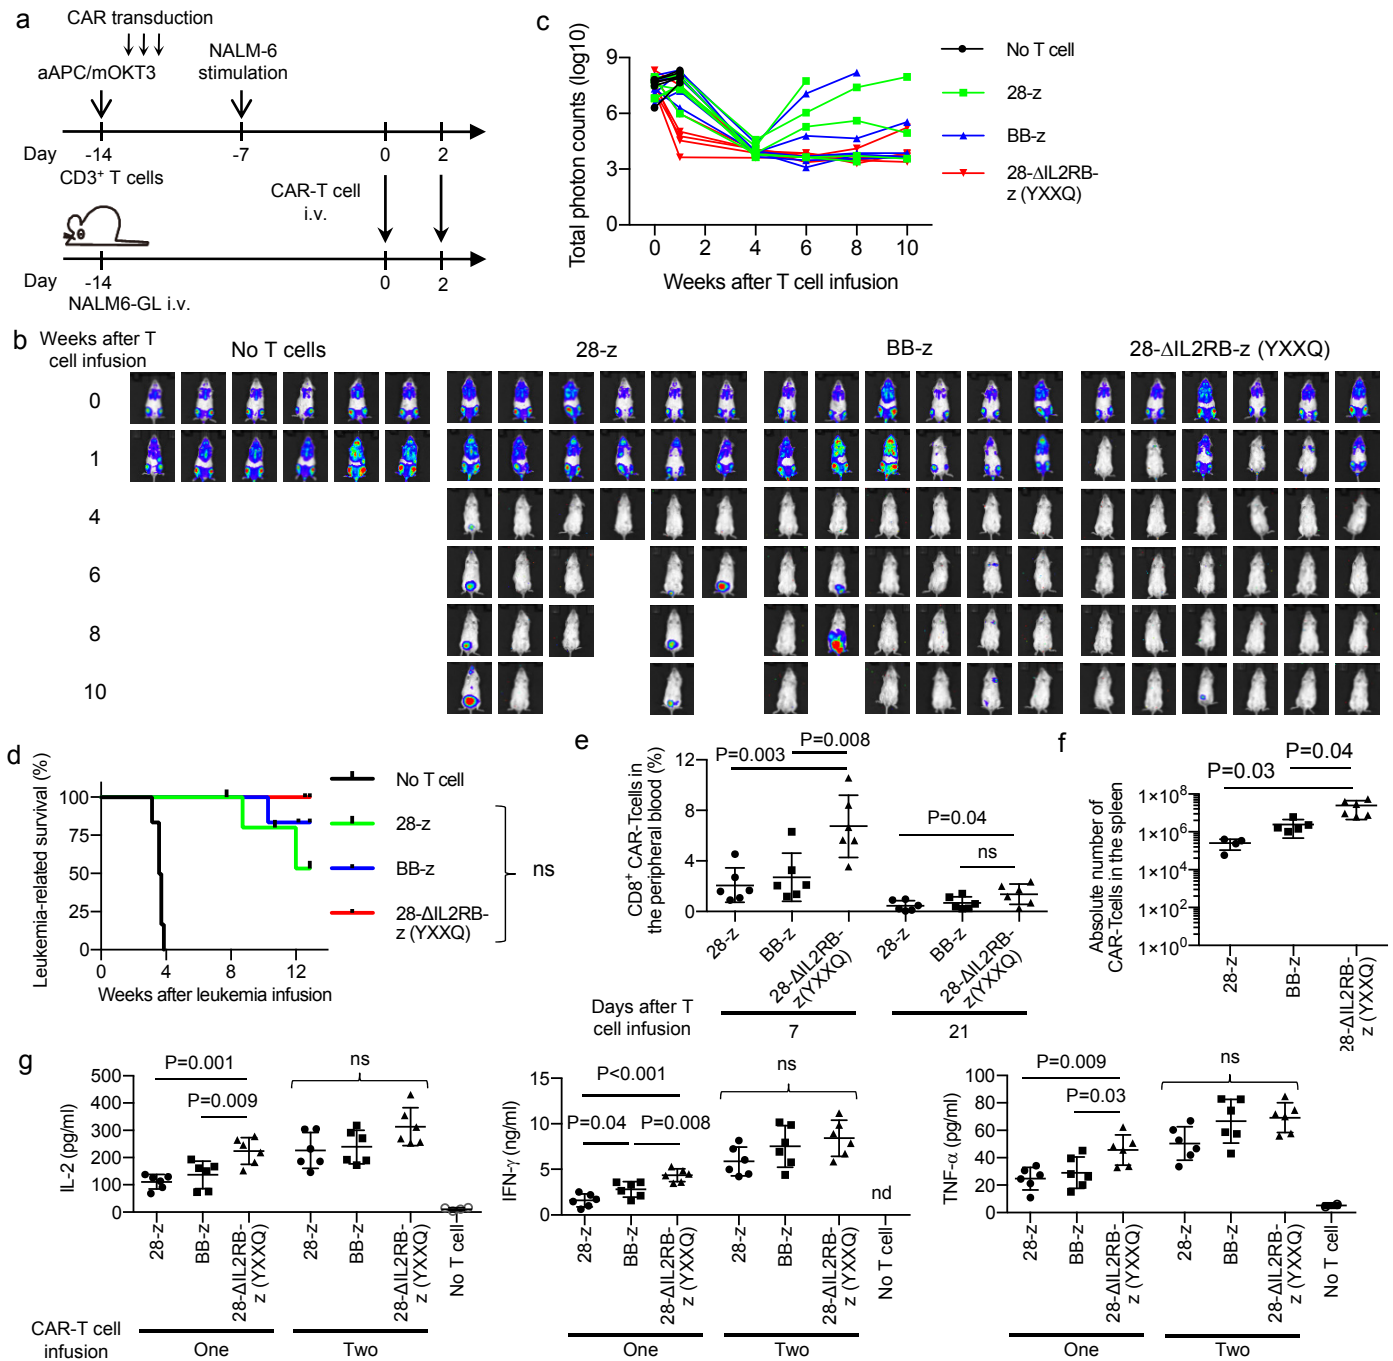

**Supplementary Fig. 15. Improved therapeutic effects of CAR-T cells by dose escalation.** (a) NOD-scid IL2 $\gamma^{\text{null}}$  (NSG) mice were intravenously infused with the NALM6-GL and treated with two infusions of the  $5 \times 10^6$  CAR-T cells. (b, c) Leukemia progression was monitored by *in vivo* bioluminescent imaging of luciferase activity. Individual images (b) and the quantified total photon counts (c) are shown ( $n=6$  mice for each group). (d) Kaplan–Meier curve for leukemia-related survival of the mice ( $n=6$  mice for each group, log-rank test). The mice that died of xenogeneic graft-versus-host disease (GVHD) were censored at the time of death. See Supplementary Table 3 for detailed information. (e) The frequency of CD8<sup>+</sup> CAR-T cells in the peripheral blood ( $n=6$ ; ordinary one-way ANOVA with Tukey’s multiple comparisons test;  $F=10.0$  for Day 7,  $F=3.92$  for Day 21; degree of freedom=17). (f) The absolute number of CAR-T cells persisting within the spleen was analyzed at the time of lethal GVHD or on 90 days after leukemia infusion ( $n=4$  for 28z,  $n=5$  for BB-z,  $n=6$  for 28-ΔIL2RB-z (YXXQ); ordinary one-way ANOVA with Tukey’s multiple comparisons test;  $F=5.72$ ; degree of freedom=14). The data in **d-f** are representative of two experiments. (g) Serum was collected from the mice 4 days after the first CAR-T cell infusion, and the concentrations of IL-2, IFN- $\gamma$  and TNF- $\alpha$  were measured using an enzyme-linked immunosorbent assay ( $n=6$  for each CAR group; ordinary one-way ANOVA with Tukey’s multiple comparisons test;  $F=11.16$  (IL-2-one), 3.03 (IL-2-two), 20.01 (IFN- $\gamma$ -one), 2.57 (IFN- $\gamma$ -two), 6.84 (TNF- $\alpha$ -one), 3.59 (TNF- $\alpha$ -two); degree of freedom=17). IL-2, IFN- $\gamma$ , and TNF- $\alpha$  were not detected in 8, 12, and 10, respectively, of the 12 No-T cell samples. ns, not significant; nd, not detected. In **e-g**, horizontal lines indicate mean values  $\pm$  s.d.

Supplementary Fig. 16

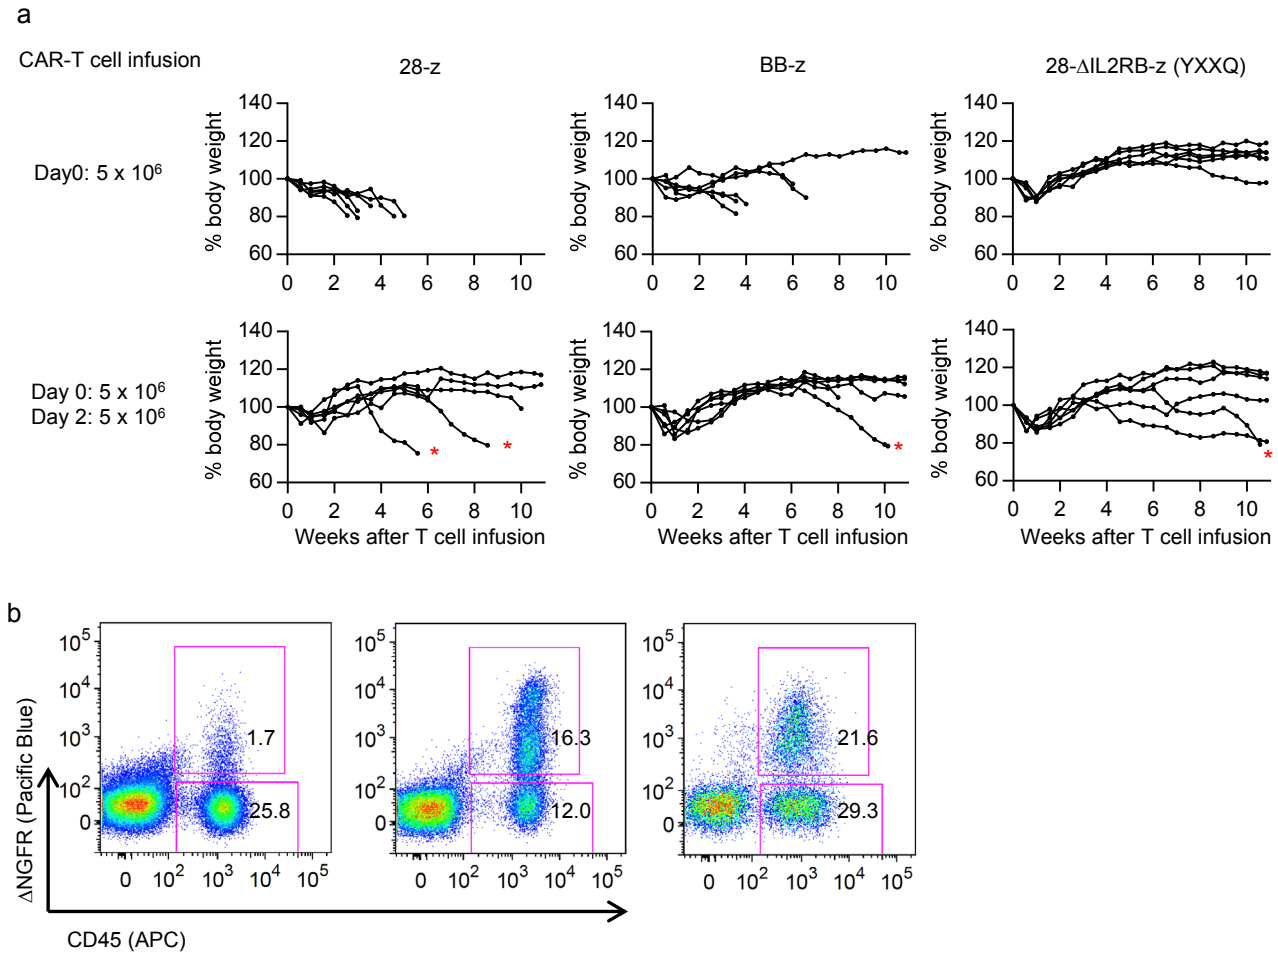

**Supplementary Fig. 16. The development of xenogeneic graft-versus-host disease (GVHD) by CAR-T cells after leukemia eradication.** (a) Serial weight monitoring of NALM-6-bearing mice infused with the indicated number of CAR-T cells (n=6 mice for each group). Relative body weight compared with the weights prior to T cell infusion are shown. The development of lethal GVHD is denoted by \*. (b) Persistence of CAR-T cells within the spleen of the mice that received two infusions of  $5 \times 10^6$  CAR-T cells was analyzed at the time of lethal GVHD or at 90 days after leukemia infusion. Representative FACS plots analyzing CD45<sup>+</sup> ΔNGFR<sup>+/-</sup> cells within the spleen of 6 mice for each group are shown.

Supplementary Fig. 17

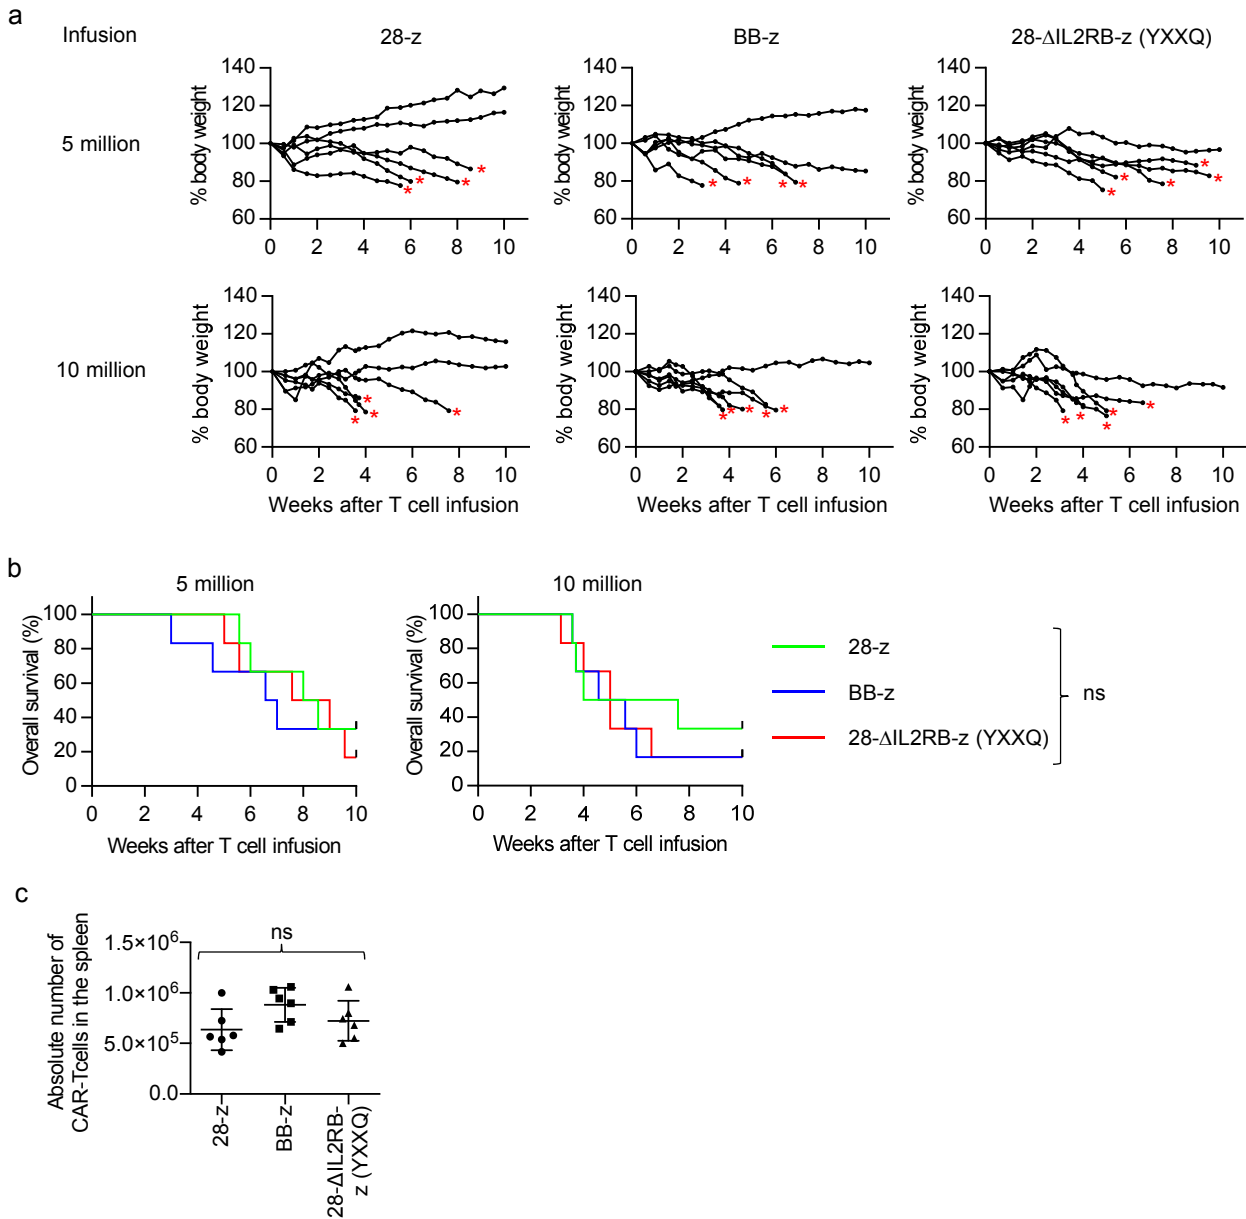

**Supplementary Fig. 17. The development of xenogeneic graft-versus-host disease by CAR-T cells in the absence of antigen.** Tumor-free NSG mice were irradiated with 1.5 Gy, and transplanted with 5 or 10 million of CAR-T cells. (a) Serial weight monitoring of the mice. Relative body weights compared with the weights prior to T cell infusion are shown. The development of lethal GVHD is denoted by \* (n=6 mice for each group). (b) Overall survival of the mice transplanted with CAR-T cells (n=6 mice for each group, log-rank test). (c) Tumor-free NSG mice were irradiated with 1.5 Gy and adoptively transferred with  $5 \times 10^6$  CAR-T cells. The mice were sacrificed 14 days after T cell infusion, and the absolute number of the CAR-T cells within the spleen was analyzed (n=6 mice; ordinary one-way ANOVA with Tukey's multiple comparisons test;  $F=2.54$ ; degree of freedom=17). Representative of two experiments. ns, not significant. Horizontal lines indicate mean values  $\pm$  s.d.

Supplementary Fig. 18

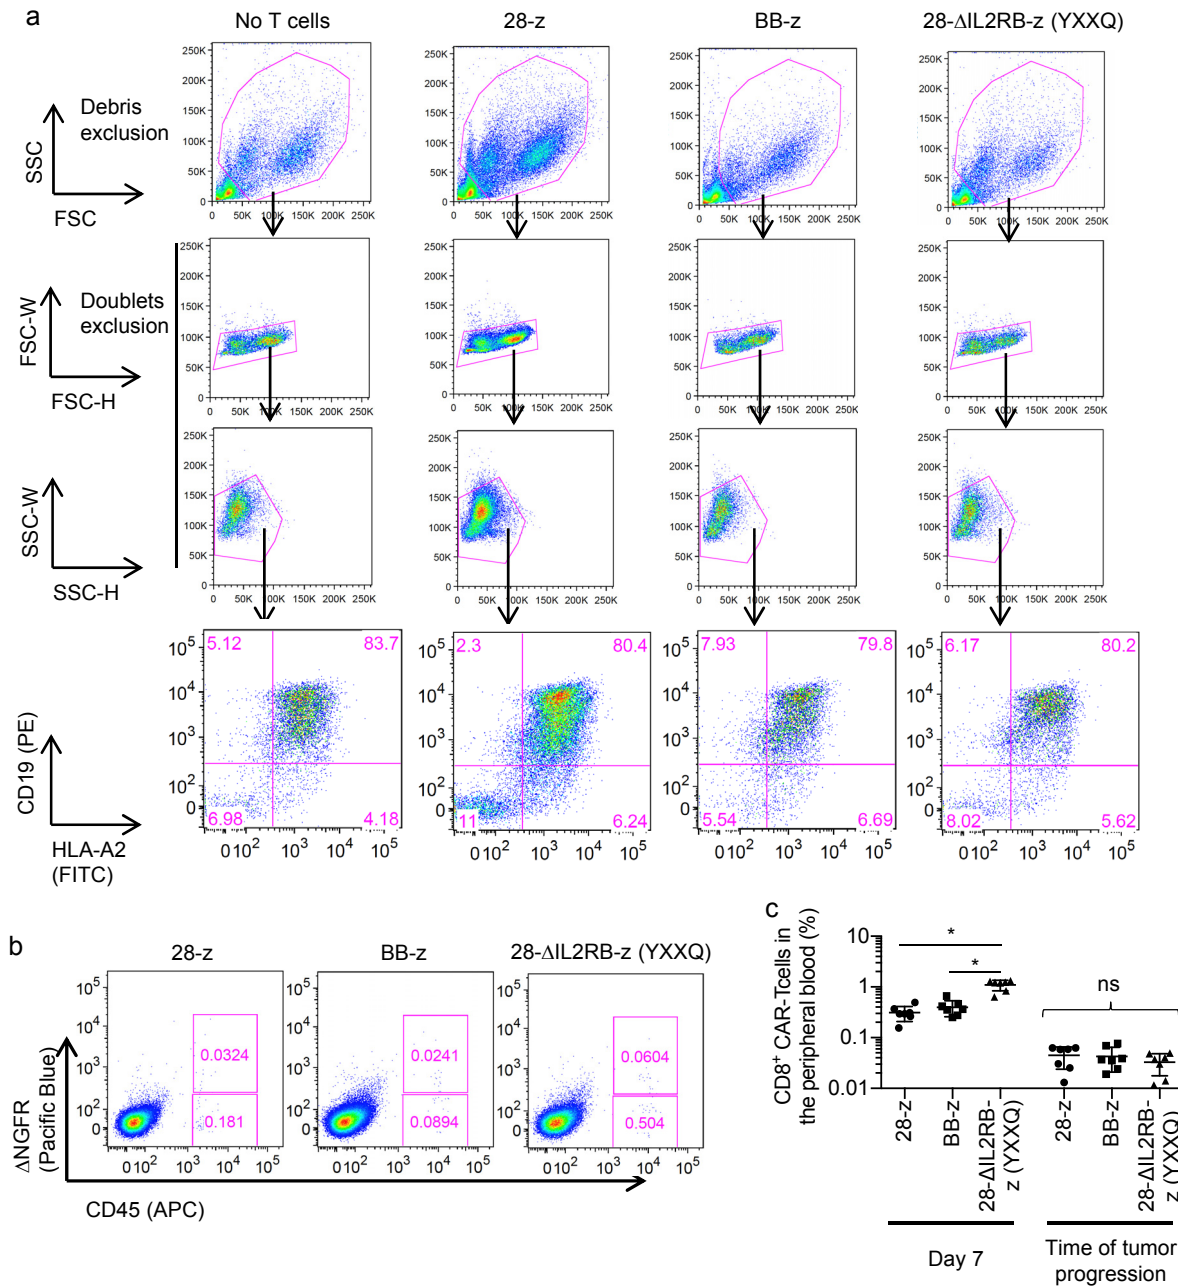

**Supplementary Fig. 18. Relapse of the melanoma cell line A375-CD19 after treatment with CAR-transduced T cells.** (a, b) NSG mice were subcutaneously injected with A375 melanoma cells transduced with CD19 (A375-CD19) (day -21) and infused with  $5 \times 10^5$  CAR-T cells on day 0 and 4. The mice were sacrificed when the tumor size exceeded  $300 \text{ mm}^3$ . (a) Progressing tumor cells were analyzed for CD19 expression. Cells were co-stained with HLA-A2 to discriminate the A375-CD19 tumor cells. (b) Persistence of the CAR-T cells within the tumor was analyzed when the tumor size exceeded  $300 \text{ mm}^3$ . In **a** and **b**, representative FACS plots from seven mice in each group are shown. (c) The frequency of CD8<sup>+</sup> CAR<sup>+</sup> T cells in the peripheral blood 7 days after CAR-T cell infusion or at the time the tumor mass exceeded  $300 \text{ mm}^3$  ( $n=7$  mice; ordinary one-way ANOVA with Tukey's multiple comparisons test for each time point;  $F=40.19$  for Day 7,  $F=0.71$  for Time of tumor progression; degree of freedom=20). \*  $P<0.001$ . ns, not significant. Horizontal lines indicate mean values  $\pm$  s.d.

**Supplementary Table 1. Amino acid sequencing of the CAR signaling domains used in this study.**

|                                       |                                                                                                                                                                                                                                                                                                                                                                                                                                                                                                                                                         |                                                                                            |
|---------------------------------------|---------------------------------------------------------------------------------------------------------------------------------------------------------------------------------------------------------------------------------------------------------------------------------------------------------------------------------------------------------------------------------------------------------------------------------------------------------------------------------------------------------------------------------------------------------|--------------------------------------------------------------------------------------------|
| 28-z                                  | IEVMYPPPYLDNEKSNGTIIHVKGKHLCPSPFLPGPSKPFWVLVVGGVLAC<br>YLLVTVAFIIFWVRSKRSRLLHSDYMNMTPRRPGPTRKHYPYAPPRDFA<br>AYRSRVKFSRSADAPAYQQGQNQLYNELNLGRREEYDVLDKRRGRDPEM<br>GGKPRRKNPQEGLYNELQKDKMAEAYSEIGMKGERRRGKGGHDGLYQGLS<br>TATKDTYDALHMQUALPPR                                                                                                                                                                                                                                                                                                              | Blue: CD28<br>Black: CD3z                                                                  |
| BB-z                                  | TTTPAPRPPTPAPTIASQPLSLRPEACRPAAGGAVHTRGLDFACDIYWAPL<br>AGTCGVLVLLSLVITLYCKRGRKLLYIFKQPFMRPVQTTQEEDGCSCRFPEE<br>EEGGCELPRVKFSRSADAPAYQQGQNQLYNELNLGRREEYDVLDKRRGR<br>DPEMGGKPRRKNPQEGLYNELQKDKMAEAYSEIGMKGERRRGKGGHDGLY<br>QGLSTATKDTYDALHMQUALPPR                                                                                                                                                                                                                                                                                                       | Black: CD8 $\alpha$<br>Green: 4-1BB<br>Black: CD3z                                         |
| 28-IL2RB-z (YXXQ)                     | IEVMYPPPYLDNEKSNGTIIHVKGKHLCPSPFLPGPSKPFWVLVVGGVLAC<br>YLLVTVAFIIFWVRSKRSRLLHSDYMNMTPRRPGPTRKHYPYAPPRDFA<br>AYRSNCRNTGPWLKKVLKNTDPDSKFFSLSSEHGGDVQKWLSSPFPS<br>SSFSPGGLAPEISPLEVLERDKVTQLLLQQDKVPEPASLSSNHSLSCTFNQ<br>GYFFFHLPDALEIEACQVYFTYDPYSEEDPDEGVAGAPTGSSPQLQPLSG<br>EDDAYCTFPSRDDLLLSPSLLGGSPSTAPGGSGAGEERMPPSLQERV<br>PRDWDQPPLGPPTPGVPDLVDFQPPPELVREAGEEVPDAGPREGVSFP<br>WSRPPGQGEFRALNARLPLNTDAYLSLQELQGQDPTHLVRVKFSRSADAP<br>AYQQGQNQLYNELNLGRREEYDVLDKRRGRDPEMGGKPRRKNPQEGLY<br>NELQKDKMAEAYSEIGMKGERRRGKGGHDGLYQGLSTATKDTYDAYRHQA<br>LPPR | Blue: CD28<br>Red: IL2RB<br>Black: CD3z with<br>YXXQ                                       |
| 28- $\Delta$ IL2RB-z (YXXQ)           | IEVMYPPPYLDNEKSNGTIIHVKGKHLCPSPFLPGPSKPFWVLVVGGVLAC<br>YLLVTVAFIIFWVRSKRSRLLHSDYMNMTPRRPGPTRKHYPYAPPRDFA<br>AYRSNCRNTGPWLKKVLKNTDPDSKFFSLSSEHGGDVQKWLSSPFPS<br>SSFSPGGLAPEISPLEVLERDKVTQLLPLNTDAYLSLQELQGQDPTHLVRVK<br>FSRSADAPAYQQGQNQLYNELNLGRREEYDVLDKRRGRDPEMGGKPRRK<br>NPQEGLYNELQKDKMAEAYSEIGMKGERRRGKGGHDGLYQGLSTATKDTY<br>DAYRHQALPPR                                                                                                                                                                                                           | Blue: CD28<br>Red: IL2RB with<br>internal deletion<br>Black: CD3z with<br>YXXQ             |
| 28- $\Delta$ IL2RB (FLSL)-z<br>(YXXQ) | IEVMYPPPYLDNEKSNGTIIHVKGKHLCPSPFLPGPSKPFWVLVVGGVLAC<br>YLLVTVAFIIFWVRSKRSRLLHSDYMNMTPRRPGPTRKHYPYAPPRDFA<br>AYRSNCRNTGPWLKKVLKNTDPDSKFFSLSSEHGGDVQKWLSSPFPS<br>SSFSPGGLAPEISPLEVLERDKVTQLLPLNTDAFLSLQELQGQDPTHLVRVK<br>FSRSADAPAYQQGQNQLYNELNLGRREEYDVLDKRRGRDPEMGGKPRRK<br>NPQEGLYNELQKDKMAEAYSEIGMKGERRRGKGGHDGLYQGLSTATKDTY<br>DAYRHQALPPR                                                                                                                                                                                                           | Blue: CD28<br>Red: IL2RB with<br>internal deletion<br>and FLSL<br>Black: CD3z with<br>YXXQ |
| 28- $\Delta$ IL2RB-z                  | IEVMYPPPYLDNEKSNGTIIHVKGKHLCPSPFLPGPSKPFWVLVVGGVLAC<br>YLLVTVAFIIFWVRSKRSRLLHSDYMNMTPRRPGPTRKHYPYAPPRDFA<br>AYRSNCRNTGPWLKKVLKNTDPDSKFFSLSSEHGGDVQKWLSSPFPS<br>SSFSPGGLAPEISPLEVLERDKVTQLLPLNTDAYLSLQELQGQDPTHLVRVK<br>FSRSADAPAYQQGQNQLYNELNLGRREEYDVLDKRRGRDPEMGGKPRRK<br>NPQEGLYNELQKDKMAEAYSEIGMKGERRRGKGGHDGLYQGLSTATKDTY<br>DALHMQUALPPR                                                                                                                                                                                                          | Blue: CD28<br>Red: IL2RB with<br>internal deletion<br>Black: CD3z                          |



**Supplementary Table 2. Differentially expressed genes in different CAR-T cells at the indicated time points (P<0.01 with repeated measures one-way ANOVA, and fold change >1.5 or <-1.5). IL-21-induced genes, STAT3 target genes and genes included in both gene sets are highlighted in red, blue and green, respectively.**

| 4 hours after NALM-6 stimulation (356 genes) |         |             |                           |                           |                     |         |             |                           |                           |                  |         |             |                           |                           |
|----------------------------------------------|---------|-------------|---------------------------|---------------------------|---------------------|---------|-------------|---------------------------|---------------------------|------------------|---------|-------------|---------------------------|---------------------------|
| Genes                                        | P-value | Fold Change |                           |                           | Genes               | P-value | Fold Change |                           |                           | Genes            | P-value | Fold Change |                           |                           |
|                                              |         | 28z vs BBz  | 28-AIL2RB-z (YXXQ) vs 28z | 28-AIL2RB-z (YXXQ) vs BBz |                     |         | 28z vs BBz  | 28-AIL2RB-z (YXXQ) vs 28z | 28-AIL2RB-z (YXXQ) vs BBz |                  |         | 28z vs BBz  | 28-AIL2RB-z (YXXQ) vs 28z | 28-AIL2RB-z (YXXQ) vs BBz |
| <i>BATF3</i>                                 | 0.0015  | 1.3         | 1.43                      | 1.86                      | <i>CLECL1</i>       | 0.0009  | 1.41        | 1.24                      | 1.75                      | <i>ABCB1</i>     | 0.0087  | 1.5         | -1.15                     | 1.31                      |
| <i>TWSG1</i>                                 | 0.0061  | 1.05        | 1.5                       | 1.58                      | <i>KCN43</i>        | 0.0015  | 1.08        | 1.43                      | 1.55                      | <i>IL31</i>      | 0.0051  | 2.73        | -1.58                     | 1.72                      |
| <i>MFSD2A</i>                                | 0.0003  | 1.73        | 1.04                      | 1.8                       | <i>MIR548C</i>      | 0.0094  | 1.72        | 1.09                      | 1.87                      | <i>CTDSP2</i>    | 0.0093  | -1.75       | 1.4                       | -1.26                     |
| <i>PRDM1</i>                                 | 0.0046  | 1.32        | 1.17                      | 1.54                      | <i>FIGNL1</i>       | 0.0027  | -1.04       | 1.51                      | 1.45                      | <i>CATSPERB</i>  | 0.0005  | 1.93        | -1.33                     | 1.45                      |
| <i>NKG7</i>                                  | 0.0034  | 1.27        | 1.18                      | 1.5                       | <i>KAT2B</i>        | 0.0052  | 1.51        | 1.17                      | 1.76                      | <i>WRAP53</i>    | 0.0044  | -1.52       | 1.28                      | -1.18                     |
| <i>CTLA4</i>                                 | 0.0003  | 2.09        | 1.75                      | 3.65                      | <i>ELL2</i>         | 0.0055  | 1.43        | 1.2                       | 1.72                      | <i>SKA1</i>      | 0.0019  | -1.96       | 1.44                      | -1.36                     |
| <i>SEC61A2</i>                               | 0.0014  | 1.05        | 1.75                      | 1.83                      | <i>POFUT1</i>       | 0.0014  | 1.31        | 1.26                      | 1.65                      | <i>TTK</i>       | 0.0066  | -1.6        | 1.3                       | -1.23                     |
| <i>METRNL</i>                                | 0.0063  | 1.29        | 1.44                      | 1.86                      | <i>ST8SIA4</i>      | 0.0020  | 1.31        | 1.26                      | 1.65                      | <i>LINC00892</i> | 0.0030  | 1.61        | -1.24                     | 1.3                       |
| <i>GPRI32</i>                                | 0.0000  | -1.05       | 1.69                      | 1.6                       | <i>ADAM8</i>        | 0.0014  | 1.09        | 1.39                      | 1.51                      | <i>FSCN1</i>     | 0.0091  | -1.6        | 1.29                      | -1.24                     |
| <i>ABTB2</i>                                 | 0.0001  | 1.77        | 1.12                      | 1.99                      | <i>INPP4B</i>       | 0.0006  | 1.34        | 1.24                      | 1.66                      | <i>RMI1</i>      | 0.0006  | -1.86       | 1.39                      | -1.34                     |
| <i>CYTIP</i>                                 | 0.0009  | 1.07        | 1.4                       | 1.5                       | <i>OAS2</i>         | 0.0018  | -1.27       | 1.61                      | 1.26                      | <i>ALG10</i>     | 0.0056  | -1.69       | 1.32                      | -1.28                     |
| <i>JAK3</i>                                  | 0.0058  | -1.19       | 1.54                      | 1.29                      | <i>MIR1471</i>      | 0.0068  | -1.74       | 1.82                      | 1.04                      | <i>GOLGA8DP</i>  | 0.0054  | 1.61        | -1.25                     | 1.29                      |
| <i>MLLT6</i>                                 | 0.0007  | 1.2         | 1.27                      | 1.53                      | <i>MYO1G</i>        | 0.0029  | -1.2        | 1.55                      | 1.29                      | <i>IL2</i>       | 0.0067  | 1.65        | -1.27                     | 1.3                       |
| <i>RORA</i>                                  | 0.0011  | 1.29        | 1.2                       | 1.56                      | <i>PIK3R5</i>       | 0.0003  | 1.45        | 1.15                      | 1.67                      | <i>AGFG2</i>     | 0.0011  | -1.5        | 1.23                      | -1.21                     |
| <i>BATF</i>                                  | 0.0069  | 1.32        | 1.42                      | 1.87                      | <i>ANTXR2</i>       | 0.0002  | 1.29        | 1.22                      | 1.57                      | <i>NUDT6</i>     | 0.0043  | -1.53       | 1.24                      | -1.24                     |
| <i>ICOS</i>                                  | 0.0024  | 1.07        | 1.48                      | 1.58                      | <i>HAPLN3</i>       | 0.0021  | -1.18       | 1.51                      | 1.28                      | <i>HLA-DRA</i>   | 0.0044  | -2.65       | 1.61                      | -1.65                     |
| <i>KIF3A</i>                                 | 0.0034  | -1.42       | 1.69                      | 1.19                      | <i>MT1CP</i>        | 0.0053  | -1.2        | 1.52                      | 1.27                      | <i>CHEK1</i>     | 0.0011  | -1.57       | 1.23                      | -1.27                     |
| <i>IL5</i>                                   | 0.0005  | 2.03        | 1.85                      | 3.76                      | <i>SEC24D</i>       | 0.0006  | 1.17        | 1.28                      | 1.5                       | <i>CD74</i>      | 0.0028  | -1.53       | 1.21                      | -1.27                     |
| <i>LOC101928173</i>                          | 0.0006  | 2.07        | 1.61                      | 3.33                      | <i>MDF1C</i>        | 0.0008  | 1.38        | 1.17                      | 1.6                       | <i>FAM90A10P</i> | 0.0047  | 1.53        | -1.27                     | 1.21                      |
| <i>SH3BP5</i>                                | 0.0023  | 1.22        | 2.12                      | 2.58                      | <i>PIM2</i>         | 0.0004  | 1.42        | 1.14                      | 1.63                      | <i>PRIM1</i>     | 0.0076  | -1.68       | 1.26                      | -1.33                     |
| <i>MAF</i>                                   | 0.0000  | 1.41        | 1.8                       | 2.54                      | <i>SEC31B</i>       | 0.0050  | 1.26        | 1.22                      | 1.54                      | <i>PTTG3P</i>    | 0.0033  | 1.54        | -1.29                     | 1.2                       |
| <i>APOL1</i>                                 | 0.0008  | 1.4         | 1.8                       | 2.51                      | <i>CD83</i>         | 0.0000  | 1.51        | 1.09                      | 1.65                      | <i>CBX5</i>      | 0.0008  | -1.52       | 1.18                      | -1.28                     |
| <i>CD86</i>                                  | 0.0003  | 1.59        | 1.62                      | 2.56                      | <i>MX1</i>          | 0.0079  | 1.23        | 1.23                      | 1.51                      | <i>HLA-DPA1</i>  | 0.0098  | -1.54       | 1.19                      | -1.3                      |
| <i>CCR4</i>                                  | 0.0002  | -1.16       | 2.16                      | 1.87                      | <i>LOC101929531</i> | 0.0016  | -1.25       | 1.51                      | 1.21                      | <i>C7orf31</i>   | 0.0058  | -1.66       | 1.23                      | -1.35                     |
| <i>MSC</i>                                   | 0.0005  | 1.53        | 1.58                      | 2.42                      | <i>SLC7A11</i>      | 0.0078  | 1.23        | 1.22                      | 1.5                       | <i>GPR87</i>     | 0.0060  | 2.66        | -1.7                      | 1.57                      |
| <i>FAM46C</i>                                | 0.0003  | 1.29        | 1.73                      | 2.24                      | <i>SGPL1</i>        | 0.0011  | 1.42        | 1.11                      | 1.57                      | <i>RFC4</i>      | 0.0039  | -1.8        | 1.27                      | -1.41                     |
| <i>RCAN2</i>                                 | 0.0054  | 1.44        | 1.61                      | 2.32                      | <i>ACOX3</i>        | 0.0019  | 1.45        | 1.09                      | 1.58                      | <i>CENPU</i>     | 0.0003  | -1.5        | 1.16                      | -1.3                      |
| <i>IL22</i>                                  | 0.0001  | 1.63        | 1.45                      | 2.36                      | <i>TRPS1</i>        | 0.0071  | 1.31        | 1.16                      | 1.51                      | <i>ILIR1</i>     | 0.0067  | 1.51        | -1.3                      | 1.16                      |
| <i>APOL2</i>                                 | 0.0016  | 1.44        | 1.56                      | 2.24                      | <i>LOC105373723</i> | 0.0017  | 1.53        | 1.05                      | 1.61                      | <i>DHCR24</i>    | 0.0019  | -1.79       | 1.26                      | -1.42                     |
| <i>SYTL3</i>                                 | 0.0004  | 1.35        | 1.61                      | 2.17                      | <i>CST7</i>         | 0.0054  | 1.31        | 1.15                      | 1.51                      | <i>NCAPH</i>     | 0.0007  | -1.74       | 1.24                      | -1.4                      |
| <i>TOX</i>                                   | 0.0027  | 1.22        | 1.71                      | 2.07                      | <i>LOC341056</i>    | 0.0097  | -1.41       | 1.55                      | 1.1                       | <i>CTTNBP2NL</i> | 0.0045  | -1.61       | 1.19                      | -1.35                     |
| <i>GZMH</i>                                  | 0.0000  | 1.58        | 1.46                      | 2.31                      | <i>MAML2</i>        | 0.0046  | 1.43        | 1.09                      | 1.56                      | <i>ANLN</i>      | 0.0013  | -1.73       | 1.22                      | -1.41                     |
| <i>DDX60</i>                                 | 0.0014  | 1.04        | 1.82                      | 1.9                       | <i>LMNB1</i>        | 0.0027  | -1.34       | 1.52                      | 1.13                      | <i>E2F1</i>      | 0.0072  | -1.67       | 1.18                      | -1.41                     |
| <i>C10orf128</i>                             | 0.0008  | 1.82        | 1.29                      | 2.35                      | <i>TPH3P3</i>       | 0.0040  | 1.32        | 1.14                      | 1.5                       | <i>FOXM1</i>     | 0.0043  | -1.5        | 1.11                      | -1.35                     |
| <i>TNFRSF8</i>                               | 0.0024  | 1.04        | 1.77                      | 1.85                      | <i>ADR2</i>         | 0.0063  | 1.4         | 1.1                       | 1.53                      | <i>VTRNA1-2</i>  | 0.0080  | 1.69        | -1.43                     | 1.18                      |
| <i>FCRL3</i>                                 | 0.0013  | 1.45        | 1.47                      | 2.12                      | <i>LOC101929536</i> | 0.0023  | -1.38       | 1.52                      | 1.1                       | <i>MIR4773-2</i> | 0.0015  | 1.56        | -1.39                     | 1.13                      |
| <i>NUGG</i>                                  | 0.0011  | 1.02        | 1.74                      | 1.78                      | <i>SLC41A2</i>      | 0.0028  | 1.46        | 1.06                      | 1.55                      | <i>BRIP1</i>     | 0.0061  | -1.56       | 1.12                      | -1.39                     |
| <i>IL6R</i>                                  | 0.0023  | 1.3         | 1.52                      | 1.98                      | <i>UBXN10</i>       | 0.0091  | -1.39       | 1.5                       | 1.08                      | <i>ITGAV</i>     | 0.0069  | 1.58        | -1.4                      | 1.13                      |
| <i>LY96</i>                                  | 0.0021  | 1.19        | 1.58                      | 1.88                      | <i>SOD2</i>         | 0.0044  | 1.47        | 1.03                      | 1.52                      | <i>MTX3</i>      | 0.0002  | 1.83        | -1.5                      | 1.21                      |
| <i>LAMP3</i>                                 | 0.0004  | 1.48        | 1.39                      | 2.07                      | <i>LOC105376626</i> | 0.0000  | 2.9         | -1.04                     | 2.78                      | <i>TPX2</i>      | 0.0006  | -1.75       | 1.18                      | -1.48                     |
| <i>INSIG1</i>                                | 0.0000  | 1.62        | 1.32                      | 2.13                      | <i>ITGA2</i>        | 0.0013  | 2.12        | -1.04                     | 2.04                      | <i>LGALS9B</i>   | 0.0039  | -1.57       | 1.11                      | -1.42                     |
| <i>HERC6</i>                                 | 0.0062  | -1.05       | 1.72                      | 1.65                      | <i>MCOLN2</i>       | 0.0029  | 2.04        | -1.03                     | 1.98                      | <i>GTSE1</i>     | 0.0064  | -1.99       | 1.26                      | -1.58                     |
| <i>PDE4DIP</i>                               | 0.0054  | 1.26        | 1.49                      | 1.88                      | <i>LOC105372752</i> | 0.0046  | 2.41        | -1.21                     | 2                         | <i>HISTH3G</i>   | 0.0043  | -1.79       | 1.19                      | -1.51                     |
| <i>PROK2</i>                                 | 0.0003  | 2.14        | 1.06                      | 2.28                      | <i>FNDC9</i>        | 0.0023  | 1.73        | -1.02                     | 1.71                      | <i>ECT2</i>      | 0.0001  | -1.72       | 1.16                      | -1.48                     |
| <i>FGFBP2</i>                                | 0.0013  | 1.5         | 1.31                      | 1.97                      | <i>MIR222</i>       | 0.0021  | 2.11        | -1.15                     | 1.83                      | <i>GCNT1</i>     | 0.0021  | 1.98        | -1.58                     | 1.25                      |
| <i>LTA</i>                                   | 0.0001  | 1.31        | 1.42                      | 1.86                      | <i>IL4</i>          | 0.0043  | 1.82        | -1.05                     | 1.73                      | <i>MIR4310</i>   | 0.0031  | -1.66       | 1.13                      | -1.47                     |
| <i>ADGRG1</i>                                | 0.0019  | 1.09        | 1.54                      | 1.68                      | <i>KLF3</i>         | 0.0062  | 1.52        | -1.01                     | 1.51                      | <i>NDC80</i>     | 0.0069  | -1.66       | 1.13                      | -1.47                     |
| <i>STRIP2</i>                                | 0.0015  | 1.99        | 1.07                      | 2.12                      | <i>TGFBR3</i>       | 0.0098  | 1.63        | -1.06                     | 1.55                      | <i>CDC20</i>     | 0.0009  | -1.64       | 1.12                      | -1.47                     |
| <i>F5</i>                                    | 0.0038  | 1.59        | 1.23                      | 1.96                      | <i>TNF</i>          | 0.0002  | 1.8         | -1.15                     | 1.56                      | <i>CCL20</i>     | 0.0001  | 2.45        | -1.75                     | 1.4                       |
| <i>GALNT3</i>                                | 0.0000  | 1.37        | 1.34                      | 1.84                      | <i>NIPAI1</i>       | 0.0014  | 1.8         | -1.17                     | 1.54                      | <i>PLK1</i>      | 0.0023  | -1.86       | 1.2                       | -1.55                     |
| <i>GSAP</i>                                  | 0.0037  | 1.31        | 1.37                      | 1.79                      | <i>PLEK</i>         | 0.0008  | 2.13        | -1.29                     | 1.66                      | <i>CKAP2</i>     | 0.0014  | -1.58       | 1.09                      | -1.45                     |
| <i>TRGV2</i>                                 | 0.0082  | 1.21        | 1.42                      | 1.73                      | <i>B3GNT5</i>       | 0.0010  | 1.57        | -1.08                     | 1.45                      | <i>KIAA1841</i>  | 0.0074  | -1.96       | 1.23                      | -1.59                     |
| <i>EOMES</i>                                 | 0.0011  | 1.18        | 1.44                      | 1.7                       | <i>LOC105379052</i> | 0.0088  | 1.61        | -1.1                      | 1.47                      | <i>BIRC5</i>     | 0.0003  | -1.76       | 1.15                      | -1.53                     |
| <i>RASA2</i>                                 | 0.0025  | 1.15        | 1.46                      | 1.68                      | <i>LINC00861</i>    | 0.0076  | 1.61        | -1.11                     | 1.44                      | <i>NUSAP1</i>    | 0.0009  | -1.71       | 1.12                      | -1.52                     |
| <i>LIMA1</i>                                 | 0.0012  | 1.17        | 1.44                      | 1.69                      | <i>CCL3L3</i>       | 0.0007  | 1.71        | -1.16                     | 1.47                      | <i>SCCPDH</i>    | 0.0045  | -1.55       | 1.06                      | -1.46                     |
| <i>TMEM173</i>                               | 0.0071  | -1.12       | 1.65                      | 1.48                      | <i>PIGV</i>         | 0.0041  | 1.53        | -1.1                      | 1.39                      | <i>UBE2C</i>     | 0.0100  | -1.5        | 1.04                      | -1.45                     |
| <i>MIR4326</i>                               | 0.0072  | 1.96        | 1.05                      | 2.07                      | <i>ZNF280D</i>      | 0.0093  | -1.54       | 1.39                      | -1.11                     | <i>ACAT2</i>     | 0.0094  | -1.51       | 1.03                      | -1.47                     |
| <i>MIR518A1</i>                              | 0.0037  | -1.08       | 1.62                      | 1.5                       | <i>CDC42EP3</i>     | 0.0036  | 1.85        | -1.24                     | 1.5                       | <i>DTL</i>       | 0.0029  | -1.54       | 1.04                      | -1.48                     |
| <i>LOC101927902</i>                          | 0.0005  | 1.21        | 1.41                      | 1.71                      | <i>MIR96</i>        | 0.0078  | 1.63        | -1.16                     | 1.4                       | <i>CENPE</i>     | 0.0004  | -1.68       | 1.09                      | -1.54                     |
| <i>CD274</i>                                 | 0.0002  | 1.39        | 1.28                      | 1.78                      | <i>BCL9L</i>        | 0.0082  | -1.63       | 1.4                       | -1.17                     | <i>MTBP</i>      | 0.0009  | -1.64       | 1.07                      | -1.54                     |
| <i>EPAS1</i>                                 | 0.0019  | 1.28        | 1.34                      | 1.71                      | <i>PTPN6</i>        | 0.0043  | -1.69       | 1.42                      | -1.19                     | <i>NCAPG2</i>    | 0.0040  | -1.59       | 1.05                      | -1.52                     |
| <i>PFKFB3</i>                                | 0.0012  | 1.14        | 1.41                      | 1.61                      | <i>DLGAP1</i>       | 0.0054  | 1.54        | -1.14                     | 1.35                      | <i>GINS1</i>     | 0.0088  | -1.52       | 1.02                      | -1.49                     |
| <i>SETBP1</i>                                | 0.0071  | 1.32        | 1.3                       | 1.72                      | <i>LINC00944</i>    | 0.0057  | 1.74        | -1.22                     | 1.42                      | <i>ADRBK1</i>    | 0.0017  | -1.51       | 1.01                      | -1.5                      |
| <i>ST6GAL1</i>                               | 0.0003  | -1.2        | 1.65                      | 1.37                      | <i>MYCBP</i>        | 0.0016  | -1.5        | 1.31                      | -1.14                     | <i>CCNB1</i>     | 0.0064  | -1.5        | 1                         | -1.49                     |

| Genes               | P-value | Fold Change |                           |                           | Genes               | P-value | Fold Change |                           |                           | Genes           | P-value | Fold Change |                           |                           |
|---------------------|---------|-------------|---------------------------|---------------------------|---------------------|---------|-------------|---------------------------|---------------------------|-----------------|---------|-------------|---------------------------|---------------------------|
|                     |         | 28z vs BB-z | 28-AIL2RB-z (YXXQ) vs 28z | 28-AIL2RB-z (YXXQ) vs BBz |                     |         | 28z vs BB-z | 28-AIL2RB-z (YXXQ) vs 28z | 28-AIL2RB-z (YXXQ) vs BBz |                 |         | 28z vs BB-z | 28-AIL2RB-z (YXXQ) vs 28z | 28-AIL2RB-z (YXXQ) vs BBz |
| <i>KIF11</i>        | 0.0003  | -1.86       | 1.14                      | -1.64                     | <i>ADRBK2</i>       | 0.0004  | -1.19       | -1.31                     | -1.55                     | <i>RASGEF1B</i> | 0.0067  | 1.27        | -1.93                     | -1.52                     |
| <i>PRCI</i>         | 0.0003  | -1.55       | 1.02                      | -1.53                     | <i>CD9</i>          | 0.0059  | -1.8        | -1.02                     | -1.85                     | <i>ANKRD30B</i> | 0.0084  | -1.73       | -1.27                     | -2.19                     |
| <i>SOLE</i>         | 0.0004  | -1.56       | 1.02                      | -1.53                     | <i>SMOX</i>         | 0.0001  | 1.84        | -1.86                     | -1.01                     | <i>PIP5K1B</i>  | 0.0075  | -1.86       | -1.23                     | -2.29                     |
| <i>RAPH1</i>        | 0.0006  | 1.85        | -1.66                     | 1.12                      | <i>ABHD2</i>        | 0.0033  | 1.08        | -1.5                      | -1.38                     | <i>BTLA</i>     | 0.0001  | 1.06        | -1.85                     | -1.73                     |
| <i>UBE2T</i>        | 0.0000  | -1.9        | 1.13                      | -1.68                     | <i>FGFR1</i>        | 0.0002  | -1.29       | -1.26                     | -1.62                     | <i>CD200</i>    | 0.0008  | 1.03        | -1.86                     | -1.82                     |
| <i>ATAD2</i>        | 0.0002  | -1.71       | 1.06                      | -1.62                     | <i>IKZF2</i>        | 0.0046  | 1.09        | -1.5                      | -1.38                     | <i>CD72</i>     | 0.0016  | 1.24        | -2.04                     | -1.65                     |
| <i>INSL6</i>        | 0.0028  | 1.63        | -1.59                     | 1.02                      | <i>SERPINE2</i>     | 0.0015  | 1.15        | -1.54                     | -1.34                     | <i>MTSS1</i>    | 0.0006  | -1.88       | -1.28                     | -2.41                     |
| <i>FANCI</i>        | 0.0003  | -1.74       | 1.06                      | -1.64                     | <i>SLAMF6</i>       | 0.0080  | 1.14        | -1.53                     | -1.35                     | <i>TREML5P</i>  | 0.0016  | -1.22       | -1.67                     | -2.04                     |
| <i>MKI67</i>        | 0.0052  | -1.71       | 1.05                      | -1.63                     | <i>TRAV8-4</i>      | 0.0053  | -1.18       | -1.32                     | -1.56                     | <i>NR4A2</i>    | 0.0000  | -1.03       | -1.84                     | -1.88                     |
| <i>USP17L9P</i>     | 0.0044  | 1.76        | -1.66                     | 1.06                      | <i>FAM213A</i>      | 0.0030  | -1.24       | -1.29                     | -1.6                      | <i>INSM1</i>    | 0.0018  | -1.1        | -1.79                     | -1.97                     |
| <i>DLGAP5</i>       | 0.0000  | -1.72       | 1.04                      | -1.65                     | <i>LOC105376878</i> | 0.0001  | -1.13       | -1.36                     | -1.53                     | <i>FGL2</i>     | 0.0007  | 1.09        | -1.97                     | -1.8                      |
| <i>TICRR</i>        | 0.0002  | -1.84       | 1.07                      | -1.71                     | <i>ZG16B</i>        | 0.0024  | -1.46       | -1.18                     | -1.72                     | <i>ID3</i>      | 0.0010  | -1.35       | -1.61                     | -2.18                     |
| <i>CCNA2</i>        | 0.0000  | -2.06       | 1.15                      | -1.79                     | <i>INPP5F</i>       | 0.0011  | -1.62       | -1.11                     | -1.79                     | <i>PHEX</i>     | 0.0009  | -1.76       | -1.47                     | -2.59                     |
| <i>TOP2A</i>        | 0.0003  | -1.7        | 1.01                      | -1.69                     | <i>GREB1</i>        | 0.0094  | -1.23       | -1.3                      | -1.6                      | <i>VCAM1</i>    | 0.0068  | -2.31       | -1.24                     | -2.86                     |
| <i>YPEL3</i>        | 0.0018  | -1.81       | 1.03                      | -1.75                     | <i>TSPAN2</i>       | 0.0040  | -1.78       | -1.05                     | -1.86                     | <i>ARMC9</i>    | 0.0001  | -1.54       | -1.63                     | -2.5                      |
| <i>FAM111B</i>      | 0.0003  | -2.11       | 1.13                      | -1.87                     | <i>CD5</i>          | 0.0011  | -1.42       | -1.21                     | -1.71                     | <i>FAM72A</i>   | 0.0021  | 1.19        | -2.25                     | -1.89                     |
| <i>COL6A2</i>       | 0.0003  | -2.27       | 1.17                      | -1.94                     | <i>FLNB</i>         | 0.0031  | -1.15       | -1.36                     | -1.56                     | <i>ARHGAP42</i> | 0.0020  | 1.27        | -2.34                     | -1.83                     |
| <i>CCNB2</i>        | 0.0068  | -1.83       | 1.02                      | -1.8                      | <i>HHLA3</i>        | 0.0090  | -1.05       | -1.43                     | -1.5                      | <i>IGLC7</i>    | 0.0089  | -2.23       | -1.29                     | -2.89                     |
| <i>HLA-DQA2</i>     | 0.0034  | -2.82       | 1.33                      | -2.12                     | <i>ARHGAP31</i>     | 0.0002  | -1.56       | -1.15                     | -1.79                     | <i>NCEH1</i>    | 0.0006  | 1.1         | -2.24                     | -2.04                     |
| <i>EIF1AX</i>       | 0.0060  | 1.84        | -1.82                     | 1.01                      | <i>DUSP18</i>       | 0.0009  | 1.58        | -1.8                      | -1.14                     | <i>COL6A1</i>   | 0.0001  | -2.43       | -1.28                     | -3.1                      |
| <i>TNFSF4</i>       | 0.0013  | -2.76       | 1.27                      | -2.17                     | <i>MYO1E</i>        | 0.0082  | -1.13       | -1.38                     | -1.56                     | <i>KIAA1324</i> | 0.0011  | -2.81       | -1.18                     | -3.32                     |
| <i>NCAPG</i>        | 0.0002  | -2.08       | 1.05                      | -1.99                     | <i>DGKA</i>         | 0.0026  | -1.46       | -1.2                      | -1.75                     | <i>CCLI1</i>    | 0.0009  | -1.27       | -2.05                     | -2.6                      |
| <i>CCR8</i>         | 0.0033  | -3.43       | 1.03                      | -3.33                     | <i>UPRT</i>         | 0.0058  | -1.06       | -1.44                     | -1.52                     | <i>DHRS3</i>    | 0.0000  | -1.54       | -1.93                     | -2.96                     |
| <i>CDK1</i>         | 0.0047  | -1.49       | -1.01                     | -1.5                      | <i>KIT</i>          | 0.0036  | -1.83       | -1.05                     | -1.92                     | <i>NHS</i>      | 0.0000  | -1.88       | -1.91                     | -3.59                     |
| <i>NCAPD3</i>       | 0.0011  | -1.54       | -1.01                     | -1.55                     | <i>RSPH4A</i>       | 0.0023  | -1.04       | -1.46                     | -1.51                     | <i>CD160</i>    | 0.0000  | 1.51        | -3.33                     | -2.21                     |
| <i>NEK2</i>         | 0.0035  | -1.52       | -1.02                     | -1.55                     | <i>SGK223</i>       | 0.0010  | 1.25        | -1.65                     | -1.32                     | <i>SERPINE1</i> | 0.0001  | -1.54       | -2.2                      | -3.38                     |
| <i>THYN1</i>        | 0.0080  | -1.42       | -1.06                     | -1.51                     | <i>SNORD113-9</i>   | 0.0076  | -1.43       | -1.22                     | -1.75                     | <i>ISMI</i>     | 0.0000  | 1.13        | -3.08                     | -2.72                     |
| <i>MCM10</i>        | 0.0041  | -1.55       | -1.01                     | -1.57                     | <i>EV1A</i>         | 0.0027  | 1.98        | -1.99                     | -1.01                     | <i>CCL22</i>    | 0.0001  | -2.96       | -3.42                     | -10.13                    |
| <i>LOC105378541</i> | 0.0054  | 1.45        | -1.53                     | -1.05                     | <i>GJB2</i>         | 0.0026  | -1.18       | -1.38                     | -1.63                     |                 |         |             |                           |                           |
| <i>IL23A</i>        | 0.0011  | 1.49        | -1.57                     | -1.05                     | <i>HSD17B11</i>     | 0.0063  | -1.01       | -1.5                      | -1.52                     |                 |         |             |                           |                           |
| <i>ASPM</i>         | 0.0010  | -1.5        | -1.05                     | -1.58                     | <i>CCND1</i>        | 0.0049  | 1.16        | -1.62                     | -1.4                      |                 |         |             |                           |                           |
| <i>PDCC4</i>        | 0.0031  | -1.41       | -1.09                     | -1.54                     | <i>DOCK5</i>        | 0.0005  | -1.42       | -1.25                     | -1.77                     |                 |         |             |                           |                           |
| <i>FLJ44385</i>     | 0.0001  | 1.31        | -1.5                      | -1.14                     | <i>MYADM</i>        | 0.0002  | -1.25       | -1.34                     | -1.68                     |                 |         |             |                           |                           |
| <i>CCP110</i>       | 0.0008  | -1.3        | -1.15                     | -1.5                      | <i>LOC105379311</i> | 0.0086  | 1.41        | -1.77                     | -1.26                     |                 |         |             |                           |                           |
| <i>HSPB1</i>        | 0.0049  | -1.56       | -1.04                     | -1.61                     | <i>RILPL2</i>       | 0.0004  | 1.15        | -1.62                     | -1.41                     |                 |         |             |                           |                           |
| <i>LEF1</i>         | 0.0089  | -1.42       | -1.1                      | -1.56                     | <i>TLE4</i>         | 0.0036  | -1.02       | -1.5                      | -1.54                     |                 |         |             |                           |                           |
| <i>CAMK2D</i>       | 0.0006  | 1.34        | -1.54                     | -1.14                     | <i>CD84</i>         | 0.0013  | 1.22        | -1.67                     | -1.37                     |                 |         |             |                           |                           |
| <i>P2RY1</i>        | 0.0049  | -1.27       | -1.18                     | -1.51                     | <i>CENPH</i>        | 0.0054  | -1.3        | -1.32                     | -1.72                     |                 |         |             |                           |                           |
| <i>SPTBN1</i>       | 0.0055  | -1.35       | -1.14                     | -1.55                     | <i>EXO1</i>         | 0.0008  | -1.54       | -1.2                      | -1.85                     |                 |         |             |                           |                           |
| <i>CCDC141</i>      | 0.0021  | -1.49       | -1.08                     | -1.61                     | <i>LOC101927482</i> | 0.0091  | 1.52        | -1.84                     | -1.21                     |                 |         |             |                           |                           |
| <i>DRAM2</i>        | 0.0015  | -1.31       | -1.17                     | -1.53                     | <i>NELL2</i>        | 0.0000  | -1.23       | -1.37                     | -1.68                     |                 |         |             |                           |                           |
| <i>RRM1</i>         | 0.0001  | -1.62       | -1.03                     | -1.68                     | <i>ENOX1</i>        | 0.0081  | -1.61       | -1.17                     | -1.89                     |                 |         |             |                           |                           |
| <i>E2F8</i>         | 0.0044  | -1.3        | -1.18                     | -1.53                     | <i>KIF23</i>        | 0.0000  | -1.94       | -1.04                     | -2.03                     |                 |         |             |                           |                           |
| <i>ASB2</i>         | 0.0071  | -1.43       | -1.12                     | -1.6                      | <i>SPRY1</i>        | 0.0009  | 1.13        | -1.63                     | -1.44                     |                 |         |             |                           |                           |
| <i>BNIP3L</i>       | 0.0001  | -1.42       | -1.12                     | -1.6                      | <i>TMEM14C</i>      | 0.0079  | -1.05       | -1.5                      | -1.57                     |                 |         |             |                           |                           |
| <i>HMGB2</i>        | 0.0000  | -1.57       | -1.06                     | -1.67                     | <i>XCL2</i>         | 0.0003  | 1.03        | -1.56                     | -1.51                     |                 |         |             |                           |                           |
| <i>PRR1</i>         | 0.0007  | -1.56       | -1.07                     | -1.66                     | <i>PIKFYVE</i>      | 0.0017  | -1.18       | -1.41                     | -1.67                     |                 |         |             |                           |                           |
| <i>Cl2orf57</i>     | 0.0070  | -1.4        | -1.14                     | -1.59                     | <i>PTPN3</i>        | 0.0025  | -1.13       | -1.45                     | -1.65                     |                 |         |             |                           |                           |
| <i>CHST1</i>        | 0.0094  | 1.28        | -1.53                     | -1.2                      | <i>TESK1</i>        | 0.0003  | 1.1         | -1.63                     | -1.48                     |                 |         |             |                           |                           |
| <i>TBC1D2</i>       | 0.0008  | -1.25       | -1.22                     | -1.51                     | <i>HVCN1</i>        | 0.0011  | -1.74       | -1.14                     | -1.98                     |                 |         |             |                           |                           |
| <i>AFF3</i>         | 0.0070  | -1.45       | -1.12                     | -1.62                     | <i>RALGAP42</i>     | 0.0006  | 1.01        | -1.58                     | -1.56                     |                 |         |             |                           |                           |
| <i>CXorf21</i>      | 0.0007  | -1.45       | -1.12                     | -1.62                     | <i>FCMR</i>         | 0.0015  | 1.24        | -1.75                     | -1.41                     |                 |         |             |                           |                           |
| <i>FAT1</i>         | 0.0037  | -1.28       | -1.21                     | -1.54                     | <i>SLC35E4</i>      | 0.0016  | 1.31        | -1.79                     | -1.37                     |                 |         |             |                           |                           |
| <i>LCK</i>          | 0.0020  | -1.23       | -1.23                     | -1.52                     | <i>LAYN</i>         | 0.0040  | -1.74       | -1.16                     | -2.01                     |                 |         |             |                           |                           |
| <i>MIR3646</i>      | 0.0007  | -1.48       | -1.11                     | -1.64                     | <i>IL3</i>          | 0.0002  | 1.19        | -1.72                     | -1.45                     |                 |         |             |                           |                           |
| <i>TRAF5</i>        | 0.0040  | 1.2         | -1.5                      | -1.25                     | <i>SESTD1</i>       | 0.0081  | -1.17       | -1.46                     | -1.71                     |                 |         |             |                           |                           |
| <i>CENPF</i>        | 0.0006  | -1.54       | -1.09                     | -1.67                     | <i>LOC100507600</i> | 0.0061  | -1.5        | -1.27                     | -1.91                     |                 |         |             |                           |                           |
| <i>HMMR</i>         | 0.0000  | -1.66       | -1.04                     | -1.72                     | <i>TCF7</i>         | 0.0002  | -1.44       | -1.3                      | -1.88                     |                 |         |             |                           |                           |
| <i>POLR3C</i>       | 0.0002  | 1.19        | -1.5                      | -1.26                     | <i>GPR155</i>       | 0.0019  | 1.32        | -1.83                     | -1.38                     |                 |         |             |                           |                           |
| <i>MELK</i>         | 0.0083  | -1.46       | -1.13                     | -1.65                     | <i>NLRP6</i>        | 0.0024  | 1.06        | -1.68                     | -1.58                     |                 |         |             |                           |                           |
| <i>SMC2</i>         | 0.0029  | -1.53       | -1.1                      | -1.68                     | <i>FGF2</i>         | 0.0068  | -1.21       | -1.48                     | -1.79                     |                 |         |             |                           |                           |
| <i>CENPV</i>        | 0.0051  | -1.21       | -1.26                     | -1.52                     | <i>PLXNC1</i>       | 0.0010  | 1.07        | -1.72                     | -1.6                      |                 |         |             |                           |                           |
| <i>SUOX</i>         | 0.0023  | -1.6        | -1.07                     | -1.72                     | <i>ZCWPW2</i>       | 0.0025  | -1.93       | -1.15                     | -2.21                     |                 |         |             |                           |                           |
| <i>TYMS</i>         | 0.0012  | -1.61       | -1.07                     | -1.72                     | <i>FAM102A</i>      | 0.0012  | -1.21       | -1.52                     | -1.84                     |                 |         |             |                           |                           |
| <i>NTSE</i>         | 0.0045  | 1.56        | -1.72                     | -1.1                      | <i>MGAT5</i>        | 0.0007  | 1.18        | -1.82                     | -1.54                     |                 |         |             |                           |                           |
| <i>GPATCH11</i>     | 0.0004  | -1.33       | -1.21                     | -1.61                     | <i>CD27</i>         | 0.0000  | -1.07       | -1.63                     | -1.76                     |                 |         |             |                           |                           |
| <i>ARMCX6</i>       | 0.0064  | -1.14       | -1.32                     | -1.51                     | <i>PRCP</i>         | 0.0000  | -1.05       | -1.67                     | -1.75                     |                 |         |             |                           |                           |
| <i>CDKN3</i>        | 0.0083  | -1.23       | -1.27                     | -1.57                     | <i>JAG1</i>         | 0.0016  | -1.48       | -1.38                     | -2.05                     |                 |         |             |                           |                           |

| 24 hours after NALM-6 stimulation (429 genes) |         |             |                           |                           |                     |         |             |                           |                           |                      |         |             |                           |                           |
|-----------------------------------------------|---------|-------------|---------------------------|---------------------------|---------------------|---------|-------------|---------------------------|---------------------------|----------------------|---------|-------------|---------------------------|---------------------------|
| Genes                                         | P-value | Fold Change |                           |                           | Genes               | P-value | Fold Change |                           |                           | Genes                | P-value | Fold Change |                           |                           |
|                                               |         | 28z vs BB-z | 28-ΔIL2RB-z (YXXQ) vs 28z | 28-ΔIL2RB-z (YXXQ) vs BBz |                     |         | 28z vs BB-z | 28-ΔIL2RB-z (YXXQ) vs 28z | 28-ΔIL2RB-z (YXXQ) vs BBz |                      |         | 28z vs BB-z | 28-ΔIL2RB-z (YXXQ) vs 28z | 28-ΔIL2RB-z (YXXQ) vs BBz |
| <i>IL10</i>                                   | 0.0015  | 1.18        | 5.77                      | 6.83                      | <i>MIR580</i>       | 0.0076  | -1.08       | 1.89                      | 1.75                      | <i>LOC729088</i>     | 0.0004  | 1.54        | 1.14                      | 1.76                      |
| <i>IL1R1</i>                                  | 0.0012  | 1.48        | 1.59                      | 2.36                      | <i>CD274</i>        | 0.0005  | 1.44        | 1.49                      | 2.14                      | <i>PCCA</i>          | 0.0002  | -1.08       | 1.51                      | 1.39                      |
| <i>KLRC1</i>                                  | 0.0014  | -1.04       | 2                         | 1.92                      | <i>SLC2A3</i>       | 0.0014  | -1.09       | 1.88                      | 1.73                      | <i>MTM1</i>          | 0.0014  | -1.51       | 1.74                      | 1.15                      |
| <i>F2R</i>                                    | 0.0002  | -1.1        | 2.03                      | 1.85                      | <i>LOC105376145</i> | 0.0028  | 1.1         | 1.72                      | 1.89                      | <i>SETBP1</i>        | 0.0002  | 1.53        | 1.14                      | 1.74                      |
| <i>GZMB</i>                                   | 0.0042  | 1.4         | 1.43                      | 1.99                      | <i>PALLD</i>        | 0.0036  | -1.06       | 1.81                      | 1.71                      | <i>CASP8</i>         | 0.0046  | -1.17       | 1.55                      | 1.32                      |
| <i>PRDM1</i>                                  | 0.0009  | 1.41        | 1.31                      | 1.85                      | <i>AIM2</i>         | 0.0006  | -1.09       | 1.83                      | 1.68                      | <i>FCMR</i>          | 0.0078  | 1.24        | 1.28                      | 1.59                      |
| <i>CCR5</i>                                   | 0.0094  | -1.27       | 1.76                      | 1.38                      | <i>TNIP3</i>        | 0.0008  | -1.07       | 1.82                      | 1.69                      | <i>PWARSN</i>        | 0.0056  | 1.26        | 1.27                      | 1.59                      |
| <i>IL1R2</i>                                  | 0.0005  | 1.27        | 1.35                      | 1.71                      | <i>LOC389765</i>    | 0.0055  | 1.51        | 1.39                      | 2.09                      | <i>CLK1</i>          | 0.0061  | -1.19       | 1.55                      | 1.3                       |
| <i>KSRI</i>                                   | 0.0009  | -1.12       | 1.57                      | 1.4                       | <i>ABCA2</i>        | 0.0004  | 1.07        | 1.68                      | 1.79                      | <i>RASGRF2</i>       | 0.0089  | 1.13        | 1.34                      | 1.51                      |
| <i>GZMA</i>                                   | 0.0033  | -1.52       | 1.76                      | 1.16                      | <i>RGS9</i>         | 0.0002  | -1.18       | 1.87                      | 1.59                      | <i>PGAM1</i>         | 0.0005  | 1.38        | 1.2                       | 1.65                      |
| <i>NKG7</i>                                   | 0.0036  | 1.51        | 1.13                      | 1.7                       | <i>ANKRD20A5P</i>   | 0.0052  | 1.53        | 1.36                      | 2.08                      | <i>LAG3</i>          | 0.0027  | 1.78        | 1.02                      | 1.81                      |
| <i>GCNT1</i>                                  | 0.0017  | 1.25        | 1.21                      | 1.5                       | <i>TMED10P1</i>     | 0.0049  | 1.06        | 1.67                      | 1.77                      | <i>GLUD1</i>         | 0.0037  | 1.14        | 1.32                      | 1.51                      |
| <i>BMPRIA</i>                                 | 0.0032  | 1.51        | 1.02                      | 1.54                      | <i>MIR3685</i>      | 0.0016  | 1.52        | 1.36                      | 2.07                      | <i>PBXIP1</i>        | 0.0076  | -1.39       | 1.64                      | 1.18                      |
| <i>IL21</i>                                   | 0.0038  | -1.12       | 2.87                      | 2.56                      | <i>XRR1A</i>        | 0.0005  | 1.06        | 1.65                      | 1.75                      | <i>CIITA</i>         | 0.0066  | -1.3        | 1.59                      | 1.22                      |
| <i>ABLIM1</i>                                 | 0.0098  | -1.02       | 2.2                       | 2.15                      | <i>ACVRI</i>        | 0.0003  | 1.17        | 1.56                      | 1.83                      | <i>LOC220729</i>     | 0.0088  | -1.14       | 1.5                       | 1.31                      |
| <i>GALNT10</i>                                | 0.0017  | -1.02       | 2.09                      | 2.04                      | <i>TC2N</i>         | 0.0020  | -1.68       | 2.11                      | 1.26                      | <i>CST7</i>          | 0.0009  | 1.45        | 1.15                      | 1.66                      |
| <i>CTLA4</i>                                  | 0.0002  | 1.02        | 1.98                      | 2.02                      | <i>ARRDC3</i>       | 0.0000  | -1.25       | 1.86                      | 1.49                      | <i>TMEM14EP</i>      | 0.0073  | -1.34       | 1.61                      | 1.19                      |
| <i>SBN02</i>                                  | 0.0015  | 1.02        | 1.79                      | 1.82                      | <i>MIR3945</i>      | 0.0052  | 1.25        | 1.49                      | 1.86                      | <i>MAP3K5</i>        | 0.0000  | -1.35       | 1.6                       | 1.19                      |
| <i>CD28</i>                                   | 0.0060  | -1.22       | 1.96                      | 1.61                      | <i>TANC2</i>        | 0.0017  | 1.2         | 1.51                      | 1.82                      | <i>TMEM71</i>        | 0.0043  | -1.46       | 1.66                      | 1.13                      |
| <i>SPEF2</i>                                  | 0.0007  | 1.18        | 1.6                       | 1.88                      | <i>LINC-PINT</i>    | 0.0025  | 1.28        | 1.46                      | 1.86                      | <i>NIPAL4</i>        | 0.0039  | 1.41        | 1.15                      | 1.63                      |
| <i>MFAP3</i>                                  | 0.0025  | -1.11       | 1.79                      | 1.61                      | <i>BCAT1</i>        | 0.0043  | 1.04        | 1.62                      | 1.69                      | <i>SERPINI1</i>      | 0.0037  | -1.45       | 1.64                      | 1.13                      |
| <i>SOX5</i>                                   | 0.0003  | 1.02        | 1.64                      | 1.68                      | <i>RTKN2</i>        | 0.0000  | -1.28       | 1.85                      | 1.44                      | <i>LGALS3</i>        | 0.0078  | 1.28        | 1.21                      | 1.55                      |
| <i>NFIA</i>                                   | 0.0004  | 1.14        | 1.5                       | 1.72                      | <i>RNF213</i>       | 0.0005  | -1.48       | 1.95                      | 1.32                      | <i>LOC105376177</i>  | 0.0005  | 1.31        | 1.19                      | 1.56                      |
| <i>ITGA3</i>                                  | 0.0056  | -1          | 1.52                      | 1.52                      | <i>PGAP1</i>        | 0.0005  | 1.06        | 1.58                      | 1.67                      | <i>CCL4L1</i>        | 0.0071  | 1.68        | 1.02                      | 1.71                      |
| <i>RFX3</i>                                   | 0.0042  | -1.41       | 1.54                      | 1.09                      | <i>LOC101060038</i> | 0.0072  | -1.37       | 1.88                      | 1.37                      | <i>ZNF101</i>        | 0.0006  | -1.24       | 1.51                      | 1.22                      |
| <i>BCL3</i>                                   | 0.0002  | -1.18       | 2.09                      | 1.77                      | <i>KLRAP1</i>       | 0.0004  | 1.02        | 1.59                      | 1.62                      | <i>SNORD127</i>      | 0.0038  | 1.26        | 1.21                      | 1.52                      |
| <i>BATF</i>                                   | 0.0003  | -1.03       | 1.75                      | 1.7                       | <i>SNORD11B</i>     | 0.0033  | 1.25        | 1.42                      | 1.78                      | <i>VAMP4</i>         | 0.0024  | -1.28       | 1.52                      | 1.19                      |
| <i>SOC33</i>                                  | 0.0030  | 1.34        | 1.43                      | 1.92                      | <i>CD226</i>        | 0.0007  | 1.4         | 1.32                      | 1.86                      | <i>MYO6</i>          | 0.0040  | 1.46        | 1.1                       | 1.61                      |
| <i>FOSL2</i>                                  | 0.0002  | 1.25        | 1.34                      | 1.67                      | <i>TMEM65</i>       | 0.0004  | 1.03        | 1.56                      | 1.61                      | <i>SLC7A5P2</i>      | 0.0088  | 1.49        | 1.09                      | 1.62                      |
| <i>MCTP2</i>                                  | 0.0003  | -1.11       | 1.57                      | 1.41                      | <i>SIK3-IT1</i>     | 0.0002  | 1.42        | 1.31                      | 1.86                      | <i>FKBP14</i>        | 0.0079  | 1.27        | 1.18                      | 1.51                      |
| <i>GPR18</i>                                  | 0.0025  | -1.58       | 1.66                      | 1.05                      | <i>MIR573</i>       | 0.0034  | -1.16       | 1.7                       | 1.47                      | <i>CLU</i>           | 0.0045  | -1.37       | 1.55                      | 1.13                      |
| <i>OSTF1</i>                                  | 0.0001  | -1.38       | 1.51                      | 1.09                      | <i>IL1RAP</i>       | 0.0099  | 1.14        | 1.48                      | 1.69                      | <i>C10orf128</i>     | 0.0069  | 1.45        | 1.08                      | 1.56                      |
| <i>TNFRSF8</i>                                | 0.0011  | 1.34        | 5.99                      | 8.05                      | <i>ZC3H12D</i>      | 0.0061  | -1.06       | 1.62                      | 1.53                      | <i>SLC25A4</i>       | 0.0082  | 1.63        | 1                         | 1.64                      |
| <i>LOC105373955</i>                           | 0.0022  | 2           | 3.58                      | 7.16                      | <i>NUGGC</i>        | 0.0052  | 1.13        | 1.48                      | 1.67                      | <i>ZNF449</i>        | 0.0008  | -1.34       | 1.5                       | 1.12                      |
| <i>IL26</i>                                   | 0.0009  | -1          | 4.42                      | 4.41                      | <i>JGANKP</i>       | 0.0016  | -1.07       | 1.61                      | 1.51                      | <i>ARHGGEF35</i>     | 0.0017  | 1.51        | 1.04                      | 1.57                      |
| <i>EPAS1</i>                                  | 0.0045  | 2           | 2.87                      | 5.74                      | <i>SERPINB1</i>     | 0.0037  | -1.05       | 1.6                       | 1.52                      | <i>LOC105370905</i>  | 0.0005  | -1.46       | 1.54                      | 1.05                      |
| <i>COL6A3</i>                                 | 0.0049  | 1.08        | 3.41                      | 3.69                      | <i>LOC154761</i>    | 0.0052  | 1.11        | 1.48                      | 1.64                      | <i>ADAMTS6</i>       | 0.0006  | 1.44        | 1.04                      | 1.5                       |
| <i>RCAN2</i>                                  | 0.0004  | 1.02        | 3.02                      | 3.09                      | <i>CCR1</i>         | 0.0004  | -1.55       | 1.89                      | 1.22                      | <i>ADCY3</i>         | 0.0079  | 1.44        | 1.04                      | 1.5                       |
| <i>LOC101928173</i>                           | 0.0011  | 1.7         | 2.17                      | 3.69                      | <i>ADD3</i>         | 0.0057  | -1.46       | 1.84                      | 1.26                      | <i>F5</i>            | 0.0000  | 2.75        | -1.22                     | 2.25                      |
| <i>TRERF1</i>                                 | 0.0000  | -1.39       | 3.29                      | 2.36                      | <i>HLA-DRA</i>      | 0.0052  | -1.64       | 1.92                      | 1.18                      | <i>EMP1</i>          | 0.0086  | 2.37        | -1.13                     | 2.09                      |
| <i>SLCO4C1</i>                                | 0.0084  | -1.15       | 3.01                      | 2.61                      | <i>TXK</i>          | 0.0074  | -1.23       | 1.7                       | 1.38                      | <i>TP53INP1</i>      | 0.0045  | -1.92       | 1.84                      | -1.04                     |
| <i>IL7R</i>                                   | 0.0023  | -1.66       | 3.24                      | 1.95                      | <i>NARF</i>         | 0.0016  | 1.01        | 1.53                      | 1.54                      | <i>MYOF</i>          | 0.0007  | 1.93        | -1.1                      | 1.76                      |
| <i>GLUL</i>                                   | 0.0043  | 1.13        | 2.39                      | 2.71                      | <i>FAM184A</i>      | 0.0018  | 1.03        | 1.51                      | 1.56                      | <i>BNIP3</i>         | 0.0096  | 1.53        | -1.01                     | 1.51                      |
| <i>ZNRF1</i>                                  | 0.0003  | 1.09        | 2.42                      | 2.64                      | <i>RRAGC</i>        | 0.0005  | 1.19        | 1.4                       | 1.67                      | <i>ALOX5AP</i>       | 0.0001  | -1.69       | 1.55                      | -1.09                     |
| <i>ZBED2</i>                                  | 0.0057  | 1.12        | 2.33                      | 2.6                       | <i>RPRD1A</i>       | 0.0005  | -1.13       | 1.63                      | 1.44                      | <i>LOC729461</i>     | 0.0013  | -1.58       | 1.5                       | -1.05                     |
| <i>ANKRD20A1</i>                              | 0.0026  | 1.17        | 2.12                      | 2.48                      | <i>PARP9</i>        | 0.0001  | -1.3        | 1.73                      | 1.33                      | <i>HERC6</i>         | 0.0031  | -1.73       | 1.53                      | -1.13                     |
| <i>SULT1B1</i>                                | 0.0022  | -1.14       | 2.37                      | 2.08                      | <i>KLRD1</i>        | 0.0078  | 1.05        | 1.49                      | 1.56                      | <i>GZMK</i>          | 0.0051  | -2.74       | 1.86                      | -1.47                     |
| <i>DDIT4</i>                                  | 0.0025  | -1.14       | 2.27                      | 1.99                      | <i>ATP2B4</i>       | 0.0008  | -1.73       | 1.92                      | 1.11                      | <i>SIRPB1</i>        | 0.0023  | -1.73       | 1.51                      | -1.15                     |
| <i>SATB1</i>                                  | 0.0001  | -1.15       | 2.24                      | 1.95                      | <i>CRYZ</i>         | 0.0002  | -1.14       | 1.61                      | 1.42                      | <i>PAM</i>           | 0.0000  | 1.91        | -1.22                     | 1.56                      |
| <i>STRIP2</i>                                 | 0.0004  | 1.34        | 1.79                      | 2.4                       | <i>SNORD99</i>      | 0.0011  | 1.88        | 1.05                      | 1.97                      | <i>GPSM2</i>         | 0.0032  | -1.69       | 1.44                      | -1.18                     |
| <i>SH3BP5</i>                                 | 0.0009  | -1.2        | 2.27                      | 1.9                       | <i>HNRNPU</i>       | 0.0055  | 1.01        | 1.5                       | 1.51                      | <i>RHOU</i>          | 0.0055  | -1.5        | 1.36                      | -1.1                      |
| <i>FAM46C</i>                                 | 0.0003  | -1.28       | 2.34                      | 1.82                      | <i>LINC00484</i>    | 0.0035  | 1.36        | 1.28                      | 1.73                      | <i>SAMD9L</i>        | 0.0011  | -1.82       | 1.48                      | -1.23                     |
| <i>GIMAP7</i>                                 | 0.0001  | -2.15       | 2.82                      | 1.31                      | <i>GAB3</i>         | 0.0000  | -1.24       | 1.66                      | 1.34                      | <i>ENPP4</i>         | 0.0090  | 1.5         | -1.11                     | 1.34                      |
| <i>GPR160</i>                                 | 0.0008  | 1.24        | 1.83                      | 2.27                      | <i>SPATS2L</i>      | 0.0011  | -1.03       | 1.52                      | 1.47                      | <i>ERP27</i>         | 0.0009  | -1.77       | 1.44                      | -1.23                     |
| <i>GIMAP4</i>                                 | 0.0005  | -2.04       | 2.67                      | 1.31                      | <i>TRIB2</i>        | 0.0074  | -1.66       | 1.86                      | 1.12                      | <i>VDR</i>           | 0.0012  | 1.55        | -1.15                     | 1.35                      |
| <i>PRKAR2B</i>                                | 0.0033  | 1.24        | 1.76                      | 2.19                      | <i>LOC100996286</i> | 0.0008  | -1.9        | 1.95                      | 1.03                      | <i>EVI2B</i>         | 0.0009  | -1.85       | 1.46                      | -1.27                     |
| <i>FURIN</i>                                  | 0.0010  | -1.26       | 2.17                      | 1.73                      | <i>TCAF2</i>        | 0.0030  | -1.02       | 1.5                       | 1.48                      | <i>MVB12B</i>        | 0.0007  | -1.54       | 1.33                      | -1.16                     |
| <i>STOM</i>                                   | 0.0004  | -1.18       | 2.11                      | 1.78                      | <i>ARID3B</i>       | 0.0056  | 1.27        | 1.31                      | 1.66                      | <i>CNN2</i>          | 0.0044  | -1.51       | 1.31                      | -1.16                     |
| <i>KDSR</i>                                   | 0.0017  | 1.24        | 1.73                      | 2.15                      | <i>PLGLA</i>        | 0.0088  | 1.21        | 1.34                      | 1.61                      | <i>TJP2</i>          | 0.0004  | 1.86        | -1.29                     | 1.44                      |
| <i>SLC27A2</i>                                | 0.0003  | 1.03        | 1.91                      | 1.96                      | <i>SLC9A9</i>       | 0.0000  | -1.72       | 1.86                      | 1.08                      | <i>GOS2</i>          | 0.0033  | 1.9         | -1.32                     | 1.45                      |
| <i>GPR183</i>                                 | 0.0060  | -1.05       | 1.97                      | 1.87                      | <i>RNF157</i>       | 0.0004  | 1.16        | 1.36                      | 1.58                      | <i>SNORD35B</i>      | 0.0041  | 1.72        | -1.25                     | 1.38                      |
| <i>MAF</i>                                    | 0.0014  | 1.87        | 1.33                      | 2.48                      | <i>GALNT3</i>       | 0.0002  | 1.11        | 1.39                      | 1.55                      | <i>DKFZP58611420</i> | 0.0036  | -1.68       | 1.35                      | -1.24                     |
| <i>LUCAT1</i>                                 | 0.0003  | -1.24       | 2.1                       | 1.68                      | <i>CYP4F35P</i>     | 0.0090  | 1.07        | 1.42                      | 1.52                      | <i>DYNC2L1I</i>      | 0.0007  | 1.64        | -1.23                     | 1.33                      |
| <i>PIM2</i>                                   | 0.0003  | 1.56        | 1.44                      | 2.23                      | <i>SLC39A10</i>     | 0.0002  | -1.22       | 1.6                       | 1.32                      | <i>SLFN5</i>         | 0.0042  | -2.07       | 1.49                      | -1.39                     |
| <i>FNIP2</i>                                  | 0.0007  | 1.23        | 1.64                      | 2.02                      | <i>LOC101927841</i> | 0.0043  | 1.46        | 1.19                      | 1.73                      | <i>SAMD9</i>         | 0.0044  | -1.54       | 1.29                      | -1.2                      |
| <i>GZMH</i>                                   | 0.0000  | 1.62        | 1.4                       | 2.26                      | <i>GPR87</i>        | 0.0014  | 1.6         | 1.12                      | 1.78                      | <i>LOC105370435</i>  | 0.0066  | -1.59       | 1.3                       | -1.22                     |

| Genes               | P-value  | Fold Change |                           |                           | Genes               | P-value | Fold Change |                           |                           | Genes               | P-value | Fold Change |                           |                           |
|---------------------|----------|-------------|---------------------------|---------------------------|---------------------|---------|-------------|---------------------------|---------------------------|---------------------|---------|-------------|---------------------------|---------------------------|
|                     |          | 28z vs BB-z | 28-ΔIL2RB-z (YXXQ) vs 28z | 28-ΔIL2RB-z (YXXQ) vs BBz |                     |         | 28z vs BB-z | 28-ΔIL2RB-z (YXXQ) vs 28z | 28-ΔIL2RB-z (YXXQ) vs BBz |                     |         | 28z vs BB-z | 28-ΔIL2RB-z (YXXQ) vs 28z | 28-ΔIL2RB-z (YXXQ) vs BBz |
| <i>CTH</i>          | 0.005035 | 1.55        | -1.23                     | 1.26                      | <i>CYLD</i>         | 0.0029  | -1.24       | -1.24                     | -1.54                     | <i>ETS2</i>         | 0.0016  | -1.3        | -1.38                     | -1.8                      |
| <i>CINP</i>         | 0.009847 | 1.66        | -1.29                     | 1.29                      | <i>KIAA0922</i>     | 0.0032  | -1.19       | -1.27                     | -1.51                     | <i>TNFSF14</i>      | 0.0000  | 1.52        | -1.93                     | -1.26                     |
| <i>FAM65B</i>       | 0.004033 | -1.66       | 1.28                      | -1.29                     | <i>OR51A2</i>       | 0.0035  | -1.19       | -1.27                     | -1.51                     | <i>FAM69A</i>       | 0.0000  | 1.22        | -1.76                     | -1.44                     |
| <i>SMAD3</i>        | 0.001404 | -1.54       | 1.23                      | -1.25                     | <i>NFIX</i>         | 0.0072  | 1.18        | -1.51                     | -1.28                     | <i>FOXP1</i>        | 0.0081  | 1.21        | -1.75                     | -1.45                     |
| <i>NCKAP1</i>       | 0.003843 | 1.8         | -1.36                     | 1.33                      | <i>TNFAIP3</i>      | 0.0001  | 1.58        | -1.72                     | -1.08                     | <i>FUT8</i>         | 0.0055  | 1.01        | -1.61                     | -1.6                      |
| <i>KIF14</i>        | 0.002568 | -1.52       | 1.21                      | -1.26                     | <i>PDE7A</i>        | 0.0023  | -1.33       | -1.2                      | -1.6                      | <i>SERTAD2</i>      | 0.0003  | -1.19       | -1.47                     | -1.74                     |
| <i>SNORA71A</i>     | 0.006903 | 1.57        | -1.29                     | 1.22                      | <i>UBASH3B</i>      | 0.0001  | 1.38        | -1.63                     | -1.18                     | <i>LOC105377447</i> | 0.0005  | 1.04        | -1.64                     | -1.58                     |
| <i>GVINP1</i>       | 0.004866 | -1.5        | 1.18                      | -1.28                     | <i>SNTB1</i>        | 0.0008  | -1.2        | -1.28                     | -1.53                     | <i>NFE2L3</i>       | 0.0010  | 1.35        | -1.86                     | -1.37                     |
| <i>GNPDA1</i>       | 0.000047 | 2.03        | -1.48                     | 1.37                      | <i>CLIC4</i>        | 0.0070  | 1.27        | -1.57                     | -1.24                     | <i>INPP5F</i>       | 0.0069  | -1.15       | -1.51                     | -1.73                     |
| <i>APOBEC3H</i>     | 0.004123 | -1.56       | 1.19                      | -1.31                     | <i>LOC105373187</i> | 0.0091  | -1.56       | -1.1                      | -1.72                     | <i>PDCD4</i>        | 0.0048  | -1.16       | -1.5                      | -1.75                     |
| <i>CCNG2</i>        | 0.002079 | -1.57       | 1.19                      | -1.32                     | <i>UNQ6494</i>      | 0.0071  | -1.22       | -1.27                     | -1.55                     | <i>ARHGAP31</i>     | 0.0039  | 1.09        | -1.7                      | -1.56                     |
| <i>LRMP</i>         | 0.007492 | -1.62       | 1.2                       | -1.35                     | <i>HIVEP3</i>       | 0.0045  | 1.38        | -1.64                     | -1.19                     | <i>P2RY14</i>       | 0.0040  | -1.78       | -1.18                     | -2.11                     |
| <i>CCR2</i>         | 0.000834 | -2.26       | 1.42                      | -1.59                     | <i>RAB9A</i>        | 0.0003  | -1.14       | -1.33                     | -1.51                     | <i>CRIMI</i>        | 0.0090  | 2.1         | -2.25                     | -1.07                     |
| <i>IQCF3</i>        | 0.002961 | 1.68        | -1.41                     | 1.19                      | <i>LAX1</i>         | 0.0040  | 1.24        | -1.57                     | -1.27                     | <i>ATXN1</i>        | 0.0035  | -1.02       | -1.66                     | -1.69                     |
| <i>NFATC1</i>       | 0.009257 | 1.51        | -1.35                     | 1.12                      | <i>CD72</i>         | 0.0062  | 1.58        | -1.75                     | -1.11                     | <i>SYPL1</i>        | 0.0003  | -1.29       | -1.46                     | -1.89                     |
| <i>TRGJP1</i>       | 0.0089   | -1.62       | 1.15                      | -1.4                      | <i>LOC105379695</i> | 0.0087  | 1.62        | -1.77                     | -1.09                     | <i>AMICA1</i>       | 0.0001  | 1.33        | -1.92                     | -1.45                     |
| <i>KCCAT198</i>     | 0.0074   | -2.35       | 1.41                      | -1.67                     | <i>LITAF</i>        | 0.0000  | 1.28        | -1.61                     | -1.25                     | <i>NEK6</i>         | 0.0005  | 1.05        | -1.73                     | -1.65                     |
| <i>GLIPRI</i>       | 0.0020   | -1.56       | 1.09                      | -1.42                     | <i>IL10RA</i>       | 0.0012  | -1.16       | -1.32                     | -1.54                     | <i>TLR5</i>         | 0.0011  | -1.93       | -1.16                     | -2.24                     |
| <i>RGCC</i>         | 0.0020   | 1.54        | -1.42                     | 1.08                      | <i>XIRP1</i>        | 0.0099  | 1.81        | -1.85                     | -1.02                     | <i>TNFSF11</i>      | 0.0021  | 1.01        | -1.71                     | -1.7                      |
| <i>LOC101929929</i> | 0.0037   | 1.53        | -1.42                     | 1.08                      | <i>SNX11</i>        | 0.0005  | 1.11        | -1.51                     | -1.36                     | <i>MAL</i>          | 0.0051  | 1.06        | -1.75                     | -1.66                     |
| <i>MCOLN2</i>       | 0.0049   | 1.52        | -1.44                     | 1.06                      | <i>KIAA1147</i>     | 0.0057  | 1.19        | -1.56                     | -1.32                     | <i>PSTPIP2</i>      | 0.0001  | 1.99        | -2.28                     | -1.14                     |
| <i>MYBL1</i>        | 0.0094   | -1.55       | 1.05                      | -1.48                     | <i>MIR1249</i>      | 0.0059  | -1.45       | -1.18                     | -1.71                     | <i>IKZF2</i>        | 0.0007  | -1.6        | -1.32                     | -2.1                      |
| <i>TNFSF13B</i>     | 0.0062   | -1.5        | 1.02                      | -1.46                     | <i>DNAJC5B</i>      | 0.0061  | -1.81       | -1.03                     | -1.86                     | <i>COL6A1</i>       | 0.0012  | -1.27       | -1.51                     | -1.93                     |
| <i>SIRPG</i>        | 0.0006   | -1.86       | 1.16                      | -1.6                      | <i>ARHGFE3</i>      | 0.0022  | -1.11       | -1.37                     | -1.52                     | <i>SNX9</i>         | 0.0003  | 1.3         | -1.95                     | -1.5                      |
| <i>RHOB</i>         | 0.0000   | 1.71        | -1.55                     | 1.1                       | <i>OAS3</i>         | 0.0081  | -1.3        | -1.26                     | -1.64                     | <i>ISMI</i>         | 0.0044  | 1.35        | -1.99                     | -1.48                     |
| <i>MIR155HG</i>     | 0.0015   | 1.72        | -1.57                     | 1.09                      | <i>KRT7</i>         | 0.0079  | -1.32       | -1.25                     | -1.66                     | <i>NCF2</i>         | 0.0011  | 1.04        | -1.77                     | -1.71                     |
| <i>GPRI5</i>        | 0.0005   | -1.86       | 1.12                      | -1.66                     | <i>RAB30</i>        | 0.0093  | 1.12        | -1.55                     | -1.38                     | <i>SGPP2</i>        | 0.0076  | 1.03        | -1.77                     | -1.71                     |
| <i>C12orf75</i>     | 0.0007   | -1.54       | 1                         | -1.54                     | <i>PTPN3</i>        | 0.0017  | -1.77       | -1.06                     | -1.88                     | <i>RDH10</i>        | 0.0035  | -1.02       | -1.75                     | -1.79                     |
| <i>DUSP2</i>        | 0.0004   | 1.92        | -1.72                     | 1.12                      | <i>LOC105375440</i> | 0.0042  | 1.13        | -1.56                     | -1.38                     | <i>RAB8B</i>        | 0.0003  | 1.02        | -1.81                     | -1.77                     |
| <i>CCL3L3</i>       | 0.0072   | 2.17        | -1.81                     | 1.2                       | <i>ADO</i>          | 0.0069  | 1.07        | -1.52                     | -1.42                     | <i>SH2B3</i>        | 0.0002  | 1.41        | -2.1                      | -1.49                     |
| <i>CHRNA6</i>       | 0.0007   | -1.79       | 1.06                      | -1.69                     | <i>TIGIT</i>        | 0.0035  | 1.19        | -1.6                      | -1.34                     | <i>CXorf21</i>      | 0.0016  | -1.42       | -1.49                     | -2.1                      |
| <i>MFSD2A</i>       | 0.0011   | 1.75        | -1.69                     | 1.04                      | <i>STAP1</i>        | 0.0024  | -1.76       | -1.07                     | -1.88                     | <i>P2RY10</i>       | 0.0000  | -1.32       | -1.56                     | -2.06                     |
| <i>XAF1</i>         | 0.0007   | -2.01       | 1.11                      | -1.81                     | <i>STAT5A</i>       | 0.0001  | 1.2         | -1.61                     | -1.34                     | <i>MPZL3</i>        | 0.0007  | 1.19        | -1.97                     | -1.65                     |
| <i>IGKV3D-15</i>    | 0.0011   | -1.77       | 1.02                      | -1.74                     | <i>RILPL2</i>       | 0.0000  | 1.35        | -1.7                      | -1.26                     | <i>CD38</i>         | 0.0049  | -1.25       | -1.62                     | -2.02                     |
| <i>GSTA4</i>        | 0.0022   | 1.74        | -1.74                     | 1                         | <i>LOC105370498</i> | 0.0099  | 1.23        | -1.63                     | -1.33                     | <i>FSCN1</i>        | 0.0002  | -1.24       | -1.63                     | -2.03                     |
| <i>CCDC141</i>      | 0.0009   | -1.91       | 1.05                      | -1.83                     | <i>LOC105373315</i> | 0.0030  | 1.08        | -1.54                     | -1.43                     | <i>TIAM2</i>        | 0.0000  | 1.48        | -2.19                     | -1.48                     |
| <i>IRF8</i>         | 0.0008   | 3.02        | -2.58                     | 1.17                      | <i>PHLDA1</i>       | 0.0071  | -1.03       | -1.46                     | -1.51                     | <i>CD70</i>         | 0.0001  | 1.29        | -2.07                     | -1.61                     |
| <i>IFNG</i>         | 0.0021   | 2.9         | -2.89                     | 1.01                      | <i>NELL2</i>        | 0.0000  | -1.38       | -1.25                     | -1.73                     | <i>ACTN1</i>        | 0.0021  | 1.06        | -1.89                     | -1.79                     |
| <i>MDFIC</i>        | 0.0014   | 1.45        | -1.52                     | -1.05                     | <i>EBI3</i>         | 0.0005  | 1.48        | -1.78                     | -1.2                      | <i>SESN3</i>        | 0.0009  | -1.03       | -1.82                     | -1.88                     |
| <i>LOC100129973</i> | 0.0020   | -1.46       | -1.05                     | -1.53                     | <i>FAM105A</i>      | 0.0010  | -1.69       | -1.11                     | -1.87                     | <i>CD83</i>         | 0.0025  | 1.59        | -2.27                     | -1.43                     |
| <i>B3GNT5</i>       | 0.0042   | 1.42        | -1.53                     | -1.08                     | <i>EGR2</i>         | 0.0012  | 1.37        | -1.73                     | -1.26                     | <i>BCL2L1</i>       | 0.0001  | 1.4         | -2.17                     | -1.55                     |
| <i>ARHGFE2</i>      | 0.0049   | 1.33        | -1.5                      | -1.13                     | <i>NINJ1</i>        | 0.0014  | 1.24        | -1.66                     | -1.34                     | <i>TRAF1</i>        | 0.0000  | 1.29        | -2.1                      | -1.63                     |
| <i>LOC105371864</i> | 0.0001   | 1.34        | -1.51                     | -1.13                     | <i>NRIP1</i>        | 0.0025  | -1.18       | -1.38                     | -1.62                     | <i>DENND5A</i>      | 0.0013  | 1.1         | -1.95                     | -1.78                     |
| <i>IL9R</i>         | 0.0000   | -1.52       | -1.05                     | -1.59                     | <i>PPFIBP1</i>      | 0.0000  | -1.57       | -1.17                     | -1.84                     | <i>PRRT3</i>        | 0.0003  | 1.02        | -1.91                     | -1.88                     |
| <i>ADAP1</i>        | 0.0014   | 1.38        | -1.53                     | -1.11                     | <i>LINC00158</i>    | 0.0059  | 1.94        | -1.99                     | -1.02                     | <i>MIR146A</i>      | 0.0002  | 1.12        | -2.01                     | -1.79                     |
| <i>PIKFYVE</i>      | 0.0058   | -1.38       | -1.11                     | -1.53                     | <i>GPR174</i>       | 0.0026  | -1.24       | -1.35                     | -1.67                     | <i>LOC100129034</i> | 0.0036  | 1.04        | -1.94                     | -1.86                     |
| <i>EED</i>          | 0.0018   | 1.62        | -1.65                     | -1.01                     | <i>LRIG1</i>        | 0.0002  | -1.03       | -1.5                      | -1.54                     | <i>PELO</i>         | 0.0046  | -1.4        | -1.59                     | -2.22                     |
| <i>RAB11FIP1</i>    | 0.0069   | 1.33        | -1.52                     | -1.14                     | <i>IGF1LR1</i>      | 0.0000  | 1.18        | -1.64                     | -1.4                      | <i>ZNF704</i>       | 0.0005  | 1.75        | -2.5                      | -1.43                     |
| <i>ACSL6</i>        | 0.0001   | 1.66        | -1.67                     | -1                        | <i>FGFR1</i>        | 0.0001  | -1.41       | -1.26                     | -1.78                     | <i>AICDA</i>        | 0.0045  | 1.08        | -2.05                     | -1.9                      |
| <i>DOK2</i>         | 0.0004   | 1.32        | -1.52                     | -1.15                     | <i>NFKB2</i>        | 0.0004  | 1.2         | -1.66                     | -1.38                     | <i>CCLAL2</i>       | 0.0014  | 2.67        | -2.9                      | -1.09                     |
| <i>ADRBK2</i>       | 0.0022   | -1.41       | -1.11                     | -1.56                     | <i>CYSLTR1</i>      | 0.0046  | -1.6        | -1.17                     | -1.88                     | <i>RGS16</i>        | 0.0028  | 1.47        | -2.37                     | -1.62                     |
| <i>IQCF2</i>        | 0.0027   | -1.36       | -1.13                     | -1.54                     | <i>STARD4</i>       | 0.0034  | 1.09        | -1.59                     | -1.46                     | <i>CCR8</i>         | 0.0008  | -1.54       | -1.57                     | -2.43                     |
| <i>EPB41L4B</i>     | 0.0037   | -1.3        | -1.16                     | -1.51                     | <i>ADGRE5</i>       | 0.0004  | 1.04        | -1.56                     | -1.5                      | <i>MIR200C</i>      | 0.0052  | -1.28       | -1.78                     | -2.27                     |
| <i>TP53I11</i>      | 0.0046   | -1.37       | -1.13                     | -1.54                     | <i>AGK</i>          | 0.0001  | 1.18        | -1.66                     | -1.41                     | <i>CRTAM</i>        | 0.0004  | 1.31        | -2.33                     | -1.78                     |
| <i>C16orf45</i>     | 0.0071   | 1.63        | -1.66                     | -1.02                     | <i>NFKBIA</i>       | 0.0004  | 1.41        | -1.8                      | -1.27                     | <i>CD160</i>        | 0.0007  | 2.83        | -3.04                     | -1.08                     |
| <i>GCNT2</i>        | 0.0039   | -1.33       | -1.15                     | -1.53                     | <i>CAV1</i>         | 0.0001  | -1.09       | -1.47                     | -1.61                     | <i>LAYN</i>         | 0.0001  | -1.23       | -1.86                     | -2.29                     |
| <i>BMF</i>          | 0.0003   | 1.34        | -1.55                     | -1.15                     | <i>GUCY1B3</i>      | 0.0014  | -1.37       | -1.3                      | -1.78                     | <i>BACH2</i>        | 0.0001  | 1.39        | -2.43                     | -1.75                     |
| <i>SLAH2</i>        | 0.0003   | 1.33        | -1.54                     | -1.16                     | <i>PLPP1</i>        | 0.0001  | 1.02        | -1.56                     | -1.53                     | <i>PTGIR</i>        | 0.0020  | 1.29        | -2.36                     | -1.82                     |
| <i>ZBTB32</i>       | 0.0046   | 1.69        | -1.71                     | -1.01                     | <i>TNF</i>          | 0.0056  | 1.67        | -1.94                     | -1.16                     | <i>TAGAP</i>        | 0.0000  | 1.95        | -2.78                     | -1.43                     |
| <i>CD52</i>         | 0.0021   | -1.26       | -1.2                      | -1.52                     | <i>ZG16B</i>        | 0.0010  | -1.37       | -1.31                     | -1.79                     | <i>TBC1D4</i>       | 0.0001  | 2.12        | -2.89                     | -1.37                     |
| <i>LINC00853</i>    | 0.0039   | 1.26        | -1.52                     | -1.21                     | <i>TRGV10</i>       | 0.0007  | -1.58       | -1.21                     | -1.9                      | <i>SPRY1</i>        | 0.0033  | 1.59        | -2.66                     | -1.67                     |
| <i>LOC440867</i>    | 0.0083   | -1.35       | -1.16                     | -1.57                     | <i>SERPINE2</i>     | 0.0058  | 1.57        | -1.9                      | -1.21                     | <i>MYO1E</i>        | 0.0009  | 1.45        | -2.58                     | -1.78                     |
| <i>TTN</i>          | 0.0047   | -1.5        | -1.1                      | -1.65                     | <i>TRIP10</i>       | 0.0001  | 1.41        | -1.82                     | -1.29                     | <i>REL</i>          | 0.0032  | 1.42        | -2.64                     | -1.86                     |
| <i>COL6A2</i>       | 0.0053   | -1.29       | -1.2                      | -1.55                     | <i>AHI1</i>         | 0.0063  | -1.31       | -1.35                     | -1.77                     | <i>CD80</i>         | 0.0091  | 2.19        | -3.09                     | -1.41                     |
| <i>VIM</i>          | 0.0013   | -1.51       | -1.1                      | -1.66                     | <i>SGK223</i>       | 0.0008  | 1.34        | -1.79                     | -1.34                     | <i>PHEX</i>         | 0.0015  | 3.33        | -3.53                     | -1.06                     |
| <i>GBP4</i>         | 0.0022   | -1.74       | -1.01                     | -1.75                     | <i>CD109</i>        | 0.0001  | 1.62        | -1.95                     | -1.2                      | <i>LOC105370177</i> | 0.0006  | 1.41        | -2.73                     | -1.94                     |
| <i>IFNAR2</i>       | 0.0001   | -1.45       | -1.13                     | -1.64                     | <i>HVCN1</i>        | 0.0006  | 1.35        | -1.82                     | -1.34                     | <i>NHS</i>          | 0.0001  | -1.19       | -2.16                     | -2.56                     |
| <i>TSPAN13</i>      | 0.0081   | 1.41        | -1.62                     | -1.15                     | <i>SHC4</i>         | 0.0019  | 1.81        | -2.04                     | -1.13                     | <i>CCLA</i>         | 0.0008  | 2.69        | -3.49                     | -1.29                     |

| Genes           | P-value | Fold Change |                           |                           |
|-----------------|---------|-------------|---------------------------|---------------------------|
|                 |         | 28z vs BB-z | 28-ΔIL2RB-z (YXXQ) vs 28z | 28-ΔIL2RB-z (YXXQ) vs BBz |
| <i>KIAA1324</i> | 0.0004  | -1.03       | -2.38                     | -2.45                     |
| <i>VCAM1</i>    | 0.0058  | -2.42       | -1.41                     | -3.42                     |
| <i>ABTB2</i>    | 0.0017  | 1.53        | -2.98                     | -1.94                     |
| <i>IL23A</i>    | 0.0012  | 2.34        | -3.45                     | -1.48                     |
| <i>XCL1</i>     | 0.0031  | 1.38        | -2.88                     | -2.09                     |
| <i>DHRS3</i>    | 0.0000  | 1.51        | -3.01                     | -1.99                     |
| <i>PDE7B</i>    | 0.0001  | -1.88       | -1.74                     | -3.27                     |
| <i>IGF1</i>     | 0.0010  | 1.64        | -3.18                     | -1.94                     |
| <i>IL13</i>     | 0.0034  | 1.11        | -2.71                     | -2.43                     |
| <i>TNFRSF9</i>  | 0.0012  | 2.14        | -3.59                     | -1.68                     |
| <i>SDC4</i>     | 0.0002  | 1.93        | -3.53                     | -1.83                     |
| <i>IL1A</i>     | 0.0012  | 2.39        | -3.8                      | -1.59                     |
| <i>NR4A2</i>    | 0.0004  | 2.14        | -3.76                     | -1.75                     |
| <i>DUSP10</i>   | 0.0001  | 1.02        | -3.02                     | -2.94                     |
| <i>IER3</i>     | 0.0001  | 1.69        | -3.78                     | -2.23                     |
| <i>NR4A3</i>    | 0.0007  | 2.47        | -4.58                     | -1.85                     |
| <i>HNF1B</i>    | 0.0003  | -1.08       | -3.25                     | -3.51                     |
| <i>AFAP1L2</i>  | 0.0005  | -1.34       | -2.96                     | -3.96                     |
| <i>CD82</i>     | 0.0011  | 1.48        | -4.2                      | -2.83                     |
| <i>CD200</i>    | 0.0000  | 3.93        | -5.88                     | -1.49                     |
| <i>TNFSF4</i>   | 0.0009  | -1.04       | -4.85                     | -5.03                     |
| <i>XCL2</i>     | 0.0000  | 2.69        | -10.5                     | -3.9                      |
| <i>CSF2</i>     | 0.0001  | 3.35        | -13.94                    | -4.16                     |
| <i>CCL22</i>    | 0.0000  | 2.04        | -12.63                    | -6.18                     |
| <i>IL2</i>      | 0.0003  | 13.36       | -18.01                    | -1.35                     |
| <i>CCL1</i>     | 0.0001  | 2.14        | -34.25                    | -15.97                    |
| <i>IL3</i>      | 0.0001  | 13.75       | -47.44                    | -3.45                     |



| 72 hours after NALM-6 stimulaiton 1351 genes) |         |             |                           |                           |                     |         |             |                           |                           |                     |         |             |                           |                           |
|-----------------------------------------------|---------|-------------|---------------------------|---------------------------|---------------------|---------|-------------|---------------------------|---------------------------|---------------------|---------|-------------|---------------------------|---------------------------|
| Genes                                         | P-value | Fold Change |                           |                           | Genes               | P-value | Fold Change |                           |                           | Genes               | P-value | Fold Change |                           |                           |
|                                               |         | 28z vs BB-z | 28-AIL2RB-z (YXXQ) vs 28z | 28-AIL2RB-z (YXXQ) vs BBz |                     |         | 28z vs BB-z | 28-AIL2RB-z (YXXQ) vs 28z | 28-AIL2RB-z (YXXQ) vs BBz |                     |         | 28z vs BB-z | 28-AIL2RB-z (YXXQ) vs 28z | 28-AIL2RB-z (YXXQ) vs BBz |
| <i>IL18RAP</i>                                | 0.0001  | 2.7         | 1.79                      | 4.82                      | <i>LINC01358</i>    | 0.0027  | -1.86       | 5.15                      | 2.78                      | <i>HIST1H4B</i>     | 0.0023  | 1.1         | 1.97                      | 2.18                      |
| <i>GZMB</i>                                   | 0.0004  | 1.9         | 1.92                      | 3.66                      | <i>ITGA6</i>        | 0.0000  | 1.49        | 3.09                      | 4.61                      | <i>LOC154761</i>    | 0.0001  | -1.25       | 2.3                       | 1.83                      |
| <i>IL10</i>                                   | 0.0095  | -1.02       | 2.6                       | 2.56                      | <i>CATSPERB</i>     | 0.0012  | -1.7        | 4.53                      | 2.66                      | <i>HYKK</i>         | 0.0054  | -1.15       | 2.19                      | 1.91                      |
| <i>NEAT1</i>                                  | 0.0001  | -1.11       | 2.51                      | 2.28                      | <i>FGFBP2</i>       | 0.0000  | -2.47       | 4.98                      | 2.01                      | <i>LOC102724275</i> | 0.0001  | -1.33       | 2.34                      | 1.76                      |
| <i>IL12A</i>                                  | 0.0005  | -1.67       | 2.91                      | 1.74                      | <i>VSIG1</i>        | 0.0001  | -3.14       | 5.16                      | 1.64                      | <i>NUCB2</i>        | 0.0001  | -1.46       | 2.44                      | 1.66                      |
| <i>MXD1</i>                                   | 0.0004  | -1.09       | 2.14                      | 1.96                      | <i>LOC101929355</i> | 0.0068  | -1.07       | 3.3                       | 3.09                      | <i>KLRC3</i>        | 0.0000  | -2.47       | 2.91                      | 1.18                      |
| <i>GAS2L3</i>                                 | 0.0009  | 1.05        | 1.99                      | 2.09                      | <i>GIMAP4</i>       | 0.0000  | -2.23       | 4.37                      | 1.96                      | <i>MUC1</i>         | 0.0041  | -1.1        | 2.14                      | 1.95                      |
| <i>CCRS5</i>                                  | 0.0030  | -1          | 2.04                      | 2.03                      | <i>TNFRSF8</i>      | 0.0017  | 1.91        | 2.12                      | 4.05                      | <i>SEC31B</i>       | 0.0003  | 1.16        | 1.89                      | 2.2                       |
| <i>NKG7</i>                                   | 0.0004  | 1.38        | 1.63                      | 2.26                      | <i>LINC00239</i>    | 0.0000  | -1.08       | 3.18                      | 2.96                      | <i>JUN</i>          | 0.0032  | -1.23       | 2.25                      | 1.83                      |
| <i>IFNG</i>                                   | 0.0058  | 1.92        | 1.33                      | 2.55                      | <i>CXCR6</i>        | 0.0001  | 1.05        | 2.99                      | 3.14                      | <i>HEL3L</i>        | 0.0004  | -1.52       | 2.45                      | 1.61                      |
| <i>LPCAT3</i>                                 | 0.0000  | -1.2        | 2.09                      | 1.74                      | <i>GLUL</i>         | 0.0000  | 1.09        | 2.93                      | 3.2                       | <i>GNLY</i>         | 0.0000  | -1.94       | 2.66                      | 1.37                      |
| <i>KLRC1</i>                                  | 0.0023  | 1.09        | 1.8                       | 1.96                      | <i>CEP112</i>       | 0.0001  | -1.52       | 3.69                      | 2.43                      | <i>KLRD1</i>        | 0.0000  | -1.74       | 2.55                      | 1.47                      |
| <i>F2R</i>                                    | 0.0001  | 1.21        | 1.62                      | 1.96                      | <i>BCL6</i>         | 0.0001  | -2.01       | 4.08                      | 2.03                      | <i>RNF213</i>       | 0.0000  | 1.1         | 1.91                      | 2.1                       |
| <i>PLEKHF1</i>                                | 0.0061  | -1.07       | 1.63                      | 1.52                      | <i>IGKV3OR2-268</i> | 0.0004  | -1.24       | 3.3                       | 2.66                      | <i>LGMN</i>         | 0.0039  | -1.07       | 2.07                      | 1.93                      |
| <i>CD47</i>                                   | 0.0001  | -1.06       | 1.62                      | 1.52                      | <i>TJP2</i>         | 0.0005  | -1.23       | 3.23                      | 2.63                      | <i>GIMAP2</i>       | 0.0002  | -1.64       | 2.48                      | 1.51                      |
| <i>CCNE1</i>                                  | 0.0029  | -1.33       | 1.77                      | 1.33                      | <i>LINC00861</i>    | 0.0001  | -1.92       | 3.83                      | 1.99                      | <i>LINC01550</i>    | 0.0008  | -1.28       | 2.23                      | 1.75                      |
| <i>GLIPR1</i>                                 | 0.0000  | -1.47       | 1.81                      | 1.23                      | <i>PDLIM1</i>       | 0.0004  | 1.08        | 2.7                       | 2.9                       | <i>CCDC126</i>      | 0.0016  | -1.27       | 2.22                      | 1.75                      |
| <i>PLAC8</i>                                  | 0.0005  | -1.59       | 1.79                      | 1.12                      | <i>LY96</i>         | 0.0003  | 1.66        | 2.1                       | 3.49                      | <i>PLSCR1</i>       | 0.0000  | -1.07       | 2.05                      | 1.92                      |
| <i>BMPRIA</i>                                 | 0.0012  | 1.26        | 1.22                      | 1.53                      | <i>MAP3K5</i>       | 0.0000  | -1.22       | 3.07                      | 2.51                      | <i>SPATS2L</i>      | 0.0027  | 1.34        | 1.7                       | 2.27                      |
| <i>PRDM1</i>                                  | 0.0064  | 1.24        | 1.22                      | 1.51                      | <i>NUAK2</i>        | 0.0005  | -1.47       | 3.32                      | 2.26                      | <i>IGKV3D-7</i>     | 0.0001  | -1.13       | 2.1                       | 1.86                      |
| <i>SEMA7A</i>                                 | 0.0034  | 1.35        | 1.15                      | 1.56                      | <i>ELOVL4</i>       | 0.0004  | 1.38        | 2.29                      | 3.16                      | <i>LOC101928173</i> | 0.0021  | 1.68        | 1.48                      | 2.48                      |
| <i>ASXL1</i>                                  | 0.0009  | -1.35       | 1.54                      | 1.14                      | <i>FBXO32</i>       | 0.0002  | -1.79       | 3.44                      | 1.93                      | <i>FAM228B</i>      | 0.0005  | -1.27       | 2.2                       | 1.74                      |
| <i>ZFP36</i>                                  | 0.0000  | -1.6        | 3.68                      | 2.31                      | <i>GIMAP7</i>       | 0.0001  | -2.51       | 3.83                      | 1.53                      | <i>ADD2</i>         | 0.0001  | 1.43        | 1.62                      | 2.31                      |
| <i>CD28</i>                                   | 0.0004  | -1.79       | 3.39                      | 1.9                       | <i>IL26</i>         | 0.0053  | -1.19       | 2.91                      | 2.45                      | <i>ABCB1</i>        | 0.0000  | -1.29       | 2.21                      | 1.71                      |
| <i>SBNO2</i>                                  | 0.0000  | 1           | 2.47                      | 2.47                      | <i>TRPS1</i>        | 0.0000  | 1.32        | 2.31                      | 3.04                      | <i>PITPNC1</i>      | 0.0000  | -1.28       | 2.2                       | 1.72                      |
| <i>ABLIM1</i>                                 | 0.0001  | -1.66       | 2.82                      | 1.7                       | <i>LOC105373955</i> | 0.0011  | -1.27       | 2.97                      | 2.34                      | <i>STRIP2</i>       | 0.0040  | 1.6         | 1.51                      | 2.4                       |
| <i>TIAM1</i>                                  | 0.0002  | -1.93       | 2.7                       | 1.4                       | <i>IKZF3</i>        | 0.0000  | -2.09       | 3.59                      | 1.72                      | <i>MVP</i>          | 0.0015  | -1.18       | 2.11                      | 1.79                      |
| <i>PPP1R3B</i>                                | 0.0011  | 1.16        | 1.85                      | 2.15                      | <i>SLC9A9</i>       | 0.0002  | -1.82       | 3.39                      | 1.87                      | <i>ARRDC3</i>       | 0.0001  | -1.36       | 2.22                      | 1.64                      |
| <i>ITGA3</i>                                  | 0.0007  | -1.04       | 1.91                      | 1.84                      | <i>TC2N</i>         | 0.0000  | -2.17       | 3.52                      | 1.62                      | <i>FURIN</i>        | 0.0010  | 1.54        | 1.52                      | 2.34                      |
| <i>CD200R1</i>                                | 0.0003  | -2.07       | 2.47                      | 1.19                      | <i>STOM</i>         | 0.0000  | 1.69        | 1.89                      | 3.18                      | <i>GCA</i>          | 0.0034  | -1.04       | 1.97                      | 1.89                      |
| <i>TBC1D15</i>                                | 0.0008  | -1.15       | 1.81                      | 1.57                      | <i>PIK3AP1</i>      | 0.0001  | -1.03       | 2.57                      | 2.49                      | <i>GRAMD1B</i>      | 0.0012  | 1           | 1.89                      | 1.89                      |
| <i>METRNL</i>                                 | 0.0000  | 1.86        | 1.17                      | 2.16                      | <i>TRIB2</i>        | 0.0001  | -1.74       | 3.16                      | 1.82                      | <i>HIST1H2BC</i>    | 0.0012  | 1.05        | 1.83                      | 1.93                      |
| <i>RAPGEF6</i>                                | 0.0006  | -1.1        | 1.75                      | 1.58                      | <i>KCTD6</i>        | 0.0031  | 1.13        | 2.34                      | 2.64                      | <i>LOC101927902</i> | 0.0004  | -1.52       | 2.26                      | 1.49                      |
| <i>ARHGAP12</i>                               | 0.0050  | -1.17       | 1.75                      | 1.5                       | <i>GIMAP1</i>       | 0.0009  | -1.63       | 3.05                      | 1.87                      | <i>TXK</i>          | 0.0000  | -1.26       | 2.09                      | 1.66                      |
| <i>GP5M2</i>                                  | 0.0005  | -1.21       | 1.77                      | 1.46                      | <i>ZFYVE28</i>      | 0.0000  | -1          | 2.47                      | 2.45                      | <i>SLC27A2</i>      | 0.0016  | 1.28        | 1.64                      | 2.1                       |
| <i>GALNT10</i>                                | 0.0016  | 1.01        | 1.6                       | 1.62                      | <i>TP53INP1</i>     | 0.0001  | -6.06       | 5.91                      | -1.02                     | <i>ISG20</i>        | 0.0003  | -1.6        | 2.3                       | 1.43                      |
| <i>JAK3</i>                                   | 0.0086  | -1.06       | 1.63                      | 1.54                      | <i>SELL</i>         | 0.0000  | -3.33       | 3.72                      | 1.12                      | <i>CAPRN2</i>       | 0.0002  | -1.22       | 2.04                      | 1.67                      |
| <i>NPC2</i>                                   | 0.0002  | -1.1        | 1.66                      | 1.51                      | <i>ABCA2</i>        | 0.0000  | -1.4        | 2.81                      | 2                         | <i>GUSBP11</i>      | 0.0004  | -1.29       | 2.09                      | 1.62                      |
| <i>IMPA2</i>                                  | 0.0079  | 1.09        | 1.51                      | 1.65                      | <i>GZMH</i>         | 0.0001  | 1.25        | 2.12                      | 2.65                      | <i>PDGFRB</i>       | 0.0004  | 1.39        | 1.55                      | 2.16                      |
| <i>PGS1</i>                                   | 0.0006  | 1.16        | 1.44                      | 1.68                      | <i>SDK2</i>         | 0.0027  | -1.22       | 2.59                      | 2.11                      | <i>SETBP1</i>       | 0.0004  | 1.6         | 1.43                      | 2.28                      |
| <i>CFLAR</i>                                  | 0.0001  | -1.87       | 1.99                      | 1.07                      | <i>GAB3</i>         | 0.0000  | -1.05       | 2.4                       | 2.29                      | <i>PTPN13</i>       | 0.0042  | 1.02        | 1.83                      | 1.86                      |
| <i>CTS1</i>                                   | 0.0004  | -1.34       | 1.71                      | 1.28                      | <i>MIR21</i>        | 0.0002  | -1.18       | 2.53                      | 2.14                      | <i>LINC00880</i>    | 0.0013  | -1.14       | 1.96                      | 1.72                      |
| <i>SIGIRR</i>                                 | 0.0067  | -1.34       | 1.68                      | 1.25                      | <i>AIM2</i>         | 0.0007  | 1.07        | 2.25                      | 2.41                      | <i>SH3BP5</i>       | 0.0004  | -2.47       | 2.61                      | 1.06                      |
| <i>IQGAP2</i>                                 | 0.0001  | -1.16       | 1.57                      | 1.35                      | <i>GIMAP8</i>       | 0.0001  | -2.08       | 3.14                      | 1.51                      | <i>CSTF2T</i>       | 0.0005  | 1.07        | 1.76                      | 1.9                       |
| <i>IL17RA</i>                                 | 0.0062  | -1.25       | 1.53                      | 1.22                      | <i>ANKRD20A1</i>    | 0.0003  | 1.15        | 2.16                      | 2.48                      | <i>CD300A</i>       | 0.0005  | 1.61        | 1.4                       | 2.26                      |
| <i>PRPF38B</i>                                | 0.0015  | -1.27       | 1.5                       | 1.18                      | <i>CLU</i>          | 0.0086  | 1.12        | 2.19                      | 2.45                      | <i>GSDMB</i>        | 0.0000  | -1.36       | 2.1                       | 1.54                      |
| <i>SOC33</i>                                  | 0.0000  | 1.29        | 3.15                      | 4.06                      | <i>KDSR</i>         | 0.0000  | 1.58        | 1.79                      | 2.84                      | <i>LINC01058</i>    | 0.0016  | -1.66       | 2.27                      | 1.37                      |
| <i>BCL3</i>                                   | 0.0004  | -1.67       | 2.51                      | 1.5                       | <i>HSBP1L1</i>      | 0.0093  | -1.56       | 2.8                       | 1.8                       | <i>CD8B</i>         | 0.0008  | -1.15       | 1.95                      | 1.69                      |
| <i>JUNB</i>                                   | 0.0005  | -1.58       | 2.33                      | 1.47                      | <i>RARRES3</i>      | 0.0011  | -2.05       | 3.08                      | 1.51                      | <i>MX2</i>          | 0.0089  | -1.25       | 2.01                      | 1.61                      |
| <i>BATF</i>                                   | 0.0007  | -1.07       | 1.93                      | 1.81                      | <i>MIR3143</i>      | 0.0080  | 1.38        | 1.9                       | 2.63                      | <i>JHDM1D</i>       | 0.0014  | 1.12        | 1.7                       | 1.91                      |
| <i>DOCK9</i>                                  | 0.0002  | -1.47       | 1.96                      | 1.33                      | <i>LOC105370526</i> | 0.0001  | 1.57        | 1.76                      | 2.76                      | <i>HIVEP2</i>       | 0.0002  | -1.49       | 2.15                      | 1.45                      |
| <i>SUSD3</i>                                  | 0.0026  | -1.16       | 1.64                      | 1.41                      | <i>FASLG</i>        | 0.0003  | -1.13       | 2.38                      | 2.11                      | <i>ACVR1</i>        | 0.0002  | 1.12        | 1.69                      | 1.9                       |
| <i>BCR</i>                                    | 0.0004  | -1.14       | 1.54                      | 1.35                      | <i>NUGGC</i>        | 0.0005  | -1.36       | 2.57                      | 1.89                      | <i>CASP8</i>        | 0.0013  | -1.53       | 2.17                      | 1.42                      |
| <i>DUSP16</i>                                 | 0.0001  | -1.77       | 1.84                      | 1.04                      | <i>STYK1</i>        | 0.0029  | 1.41        | 1.84                      | 2.6                       | <i>SLAMF6</i>       | 0.0000  | -1.8        | 2.31                      | 1.28                      |
| <i>DPY19L3</i>                                | 0.0047  | -1.27       | 1.6                       | 1.26                      | <i>C8orf88</i>      | 0.0082  | 1.29        | 1.94                      | 2.5                       | <i>TMEM65</i>       | 0.0005  | 2.36        | 1.07                      | 2.52                      |
| <i>MCTP2</i>                                  | 0.0008  | 1.19        | 1.3                       | 1.54                      | <i>PARP9</i>        | 0.0024  | 1.01        | 2.2                       | 2.23                      | <i>ANKRD20A3</i>    | 0.0053  | 1.06        | 1.73                      | 1.84                      |
| <i>NUP98</i>                                  | 0.0000  | -1.14       | 1.5                       | 1.32                      | <i>LOC389765</i>    | 0.0097  | 1.21        | 2                         | 2.42                      | <i>KLF10</i>        | 0.0020  | 1.05        | 1.74                      | 1.83                      |
| <i>TIPARP</i>                                 | 0.0012  | -1.21       | 1.52                      | 1.26                      | <i>FAM184A</i>      | 0.0024  | 1.05        | 2.15                      | 2.25                      | <i>CMTM8</i>        | 0.0004  | 1.11        | 1.69                      | 1.88                      |
| <i>TANC2</i>                                  | 0.0001  | -1.82       | 9.87                      | 5.41                      | <i>PPLALAE</i>      | 0.0027  | 1.13        | 2.05                      | 2.31                      | <i>GBP2</i>         | 0.0000  | -1.13       | 1.89                      | 1.67                      |
| <i>SULT1B1</i>                                | 0.0007  | -1.24       | 7.82                      | 6.3                       | <i>LUCAT1</i>       | 0.0004  | 1.08        | 2.08                      | 2.25                      | <i>CEP70</i>        | 0.0000  | -1.52       | 2.14                      | 1.41                      |
| <i>KIAA0226L</i>                              | 0.0002  | -1.43       | 8                         | 5.61                      | <i>COL6A3</i>       | 0.0092  | -1.35       | 2.47                      | 1.83                      | <i>LOC105370333</i> | 0.0038  | 1.35        | 1.51                      | 2.04                      |
| <i>LOC105370676</i>                           | 0.0000  | -1.1        | 4.73                      | 4.29                      | <i>RF8</i>          | 0.0014  | -2.35       | 2.99                      | 1.27                      | <i>PHF11</i>        | 0.0002  | -1.08       | 1.84                      | 1.71                      |
| <i>ZNRF1</i>                                  | 0.0000  | 1.02        | 4.46                      | 4.55                      | <i>INTS10</i>       | 0.0000  | 1.35        | 1.79                      | 2.42                      | <i>LOC102724081</i> | 0.0000  | -1.36       | 2.03                      | 1.49                      |
| <i>TRERF1</i>                                 | 0.0000  | -1.24       | 4.94                      | 3.99                      | <i>RASA3</i>        | 0.0000  | -1.74       | 2.66                      | 1.53                      | <i>LINC00884</i>    | 0.0018  | 1.11        | 1.66                      | 1.85                      |
| <i>LOC101927613</i>                           | 0.0005  | -1.04       | 4.17                      | 4                         | <i>RRADG</i>        | 0.0004  | -1.38       | 2.43                      | 1.76                      | <i>PHOSPHO2</i>     | 0.0005  | 1.14        | 1.64                      | 1.87                      |
| <i>RCAN2</i>                                  | 0.0004  | 1.26        | 3.57                      | 4.48                      | <i>DUSP1</i>        | 0.0006  | -1.67       | 2.59                      | 1.56                      | <i>CD7</i>          | 0.0000  | -1.11       | 1.84                      | 1.66                      |

| Genes        | P-value | Fold Change |                           |                           | Genes         | P-value | Fold Change |                           |                           | Genes        | P-value | Fold Change |                           |                           |
|--------------|---------|-------------|---------------------------|---------------------------|---------------|---------|-------------|---------------------------|---------------------------|--------------|---------|-------------|---------------------------|---------------------------|
|              |         | 28z vs BB-z | 28-AIL2RB-z (YXXQ) vs 28z | 28-AIL2RB-z (YXXQ) vs BBz |               |         | 28z vs BB-z | 28-AIL2RB-z (YXXQ) vs 28z | 28-AIL2RB-z (YXXQ) vs BBz |              |         | 28z vs BB-z | 28-AIL2RB-z (YXXQ) vs 28z | 28-AIL2RB-z (YXXQ) vs BBz |
| CLEC2B       | 0.0000  | -1.11       | 1.84                      | 1.66                      | ZNF658B       | 0.0003  | -1.3        | 1.82                      | 1.39                      | UBL3         | 0.0006  | -1.87       | 1.96                      | 1.05                      |
| PLGLB1       | 0.0075  | -1.25       | 1.93                      | 1.55                      | SYCP2         | 0.0016  | -1.76       | 2.04                      | 1.16                      | LDAH         | 0.0010  | -1.15       | 1.61                      | 1.4                       |
| OZFRL1       | 0.0002  | 1.02        | 1.72                      | 1.75                      | FAM8A1        | 0.0004  | -1.37       | 1.85                      | 1.35                      | PFKFB3       | 0.0018  | -1.21       | 1.65                      | 1.36                      |
| CCDC69       | 0.0080  | -1.03       | 1.76                      | 1.7                       | GPR160        | 0.0014  | 1.32        | 1.38                      | 1.82                      | SGMS1        | 0.0009  | -1.32       | 1.71                      | 1.3                       |
| SMIM10       | 0.0011  | 1.55        | 1.36                      | 2.1                       | LOC100289361  | 0.0033  | -1          | 1.6                       | 1.59                      | FKBP11       | 0.0003  | 1.35        | 1.28                      | 1.72                      |
| C17orf62     | 0.0008  | 1.06        | 1.68                      | 1.77                      | ZNRF2         | 0.0006  | -1.36       | 1.84                      | 1.35                      | GDPD3        | 0.0016  | 1.07        | 1.45                      | 1.55                      |
| GLUD1        | 0.0015  | 1.25        | 1.54                      | 1.91                      | BLVRB         | 0.0002  | 1.11        | 1.51                      | 1.68                      | AGO4         | 0.0003  | -1.68       | 1.87                      | 1.12                      |
| LOC100507209 | 0.0040  | 1.09        | 1.65                      | 1.8                       | IGFBP7        | 0.0060  | -1.13       | 1.69                      | 1.5                       | BCAT1        | 0.0030  | 1.8         | 1.07                      | 1.92                      |
| SLC2A3       | 0.0003  | 1.74        | 1.26                      | 2.19                      | ZFP36L2       | 0.0001  | -1.85       | 2.07                      | 1.12                      | HEATR5A      | 0.0076  | 1.16        | 1.39                      | 1.6                       |
| CEP162       | 0.0002  | -1.43       | 2.03                      | 1.42                      | CLK1          | 0.0001  | -1.59       | 1.95                      | 1.23                      | TMD4         | 0.0016  | -1.23       | 1.65                      | 1.34                      |
| LOC101929241 | 0.0012  | -1.18       | 1.86                      | 1.58                      | GRAMD1C       | 0.0067  | -1.56       | 1.94                      | 1.24                      | ADD3         | 0.0006  | -1.31       | 1.69                      | 1.29                      |
| TCAF2        | 0.0000  | -1.06       | 1.77                      | 1.67                      | LOC100128816  | 0.0003  | -1.13       | 1.69                      | 1.49                      | OMA1         | 0.0006  | -1.16       | 1.6                       | 1.37                      |
| WDR59        | 0.0001  | -1.05       | 1.76                      | 1.68                      | METTL23       | 0.0006  | -1.14       | 1.69                      | 1.49                      | LDOC1L       | 0.0077  | -1.47       | 1.77                      | 1.2                       |
| SETDB2       | 0.0000  | -1.34       | 1.97                      | 1.47                      | MKRN3         | 0.0005  | 1.19        | 1.45                      | 1.73                      | LOC101928605 | 0.0077  | 1.09        | 1.42                      | 1.55                      |
| ZNF683       | 0.0034  | -1.31       | 1.95                      | 1.49                      | OARD1         | 0.0064  | -1.13       | 1.69                      | 1.49                      | MTERF2       | 0.0051  | -1.12       | 1.57                      | 1.4                       |
| GIMAP6       | 0.0044  | -1.92       | 2.26                      | 1.18                      | CXorf57       | 0.0035  | 1.04        | 1.55                      | 1.62                      | OPN3         | 0.0066  | 1.04        | 1.45                      | 1.52                      |
| INADL        | 0.0001  | -1.17       | 1.85                      | 1.58                      | DPY19L1       | 0.0053  | 1.02        | 1.56                      | 1.6                       | ZDBF2        | 0.0018  | 1.26        | 1.31                      | 1.66                      |
| AGTPBP1      | 0.0001  | 1.18        | 1.57                      | 1.85                      | GPRIN3        | 0.0013  | -1          | 1.58                      | 1.58                      | ZNF141       | 0.0014  | -1.12       | 1.57                      | 1.4                       |
| LAG3         | 0.0007  | 1.43        | 1.41                      | 2.01                      | ZNF101        | 0.0001  | 1.06        | 1.53                      | 1.63                      | ZNF350       | 0.0000  | -1.28       | 1.67                      | 1.3                       |
| FAM46C       | 0.0019  | 1.26        | 1.51                      | 1.9                       | ATP2B4        | 0.0001  | -1.25       | 1.76                      | 1.4                       | KLF3         | 0.0003  | -1.83       | 1.91                      | 1.05                      |
| PCED1B       | 0.0013  | -1.66       | 2.13                      | 1.28                      | HENMT1        | 0.0001  | -1.22       | 1.73                      | 1.42                      | FAM160B1     | 0.0000  | -1.35       | 1.7                       | 1.26                      |
| PHYKPL       | 0.0000  | -1.09       | 1.78                      | 1.63                      | LOC101927027  | 0.0032  | -1.27       | 1.76                      | 1.39                      | MANIA1       | 0.0012  | 1.15        | 1.38                      | 1.58                      |
| NARF         | 0.0000  | -1.05       | 1.74                      | 1.66                      | LOC645513     | 0.0051  | -1.11       | 1.66                      | 1.49                      | POLC3        | 0.0014  | -1.17       | 1.6                       | 1.36                      |
| FLJ32255     | 0.0023  | -1.34       | 1.95                      | 1.45                      | ZNF84         | 0.0009  | -1.31       | 1.78                      | 1.36                      | PTPRCAP      | 0.0008  | -1.41       | 1.73                      | 1.23                      |
| KLHDC1       | 0.0041  | -1.46       | 2.02                      | 1.38                      | LOC102723540  | 0.0084  | -2.05       | 2.11                      | 1.03                      | PRG4         | 0.0083  | -1.8        | 1.9                       | 1.05                      |
| RGS9         | 0.0006  | -1.59       | 2.08                      | 1.31                      | STK17A        | 0.0008  | -1.21       | 1.72                      | 1.42                      | AQP3         | 0.0002  | -1.75       | 1.87                      | 1.07                      |
| VWASA        | 0.0017  | -1.12       | 1.79                      | 1.6                       | RAB38         | 0.0012  | -1.09       | 1.63                      | 1.5                       | SLC16A7      | 0.0005  | 1.19        | 1.34                      | 1.6                       |
| GPR135       | 0.0098  | -1.07       | 1.75                      | 1.63                      | ADGRE1        | 0.0097  | -1.35       | 1.8                       | 1.33                      | FAM89B       | 0.0034  | -1.76       | 1.88                      | 1.06                      |
| LOC105373495 | 0.0002  | -1.52       | 2.04                      | 1.34                      | JAKMIP2       | 0.0048  | -1.34       | 1.79                      | 1.34                      | GSAP         | 0.0012  | -1.1        | 1.54                      | 1.4                       |
| MTIL         | 0.0029  | -1.46       | 2.01                      | 1.37                      | UHRF2         | 0.0064  | -1.11       | 1.65                      | 1.48                      | TLR1         | 0.0005  | -1.16       | 1.58                      | 1.35                      |
| RWDD2A       | 0.0008  | -1.27       | 1.89                      | 1.49                      | TRIM5         | 0.0002  | -1.58       | 1.91                      | 1.21                      | ZNF440       | 0.0003  | -1.3        | 1.66                      | 1.27                      |
| IRAK4        | 0.0006  | -1.22       | 1.85                      | 1.52                      | ACVR2A        | 0.0053  | -1.4        | 1.82                      | 1.3                       | DHRS12       | 0.0004  | -1.08       | 1.51                      | 1.41                      |
| PAPD5        | 0.0020  | -1.14       | 1.79                      | 1.58                      | RNFT1         | 0.0011  | -1.25       | 1.73                      | 1.39                      | GZMM         | 0.0010  | 1.1         | 1.39                      | 1.53                      |
| RNF157       | 0.0009  | 1.59        | 1.3                       | 2.07                      | ST6GALNAC3    | 0.0052  | -1.07       | 1.61                      | 1.5                       | JMJD1C       | 0.0016  | -1.09       | 1.52                      | 1.4                       |
| ENPP2        | 0.0084  | -1.65       | 2.09                      | 1.27                      | HMGB1         | 0.0028  | -1.47       | 1.85                      | 1.26                      | TPP1         | 0.0001  | -1.45       | 1.73                      | 1.19                      |
| MT1F         | 0.0022  | -1.97       | 2.23                      | 1.13                      | NOTCH1        | 0.0001  | -1.1        | 1.63                      | 1.48                      | CHST12       | 0.0009  | -1.6        | 1.79                      | 1.12                      |
| FOSB         | 0.0053  | -1.39       | 1.96                      | 1.4                       | CST7          | 0.0001  | 1.37        | 1.31                      | 1.79                      | F5           | 0.0038  | 1.07        | 1.41                      | 1.5                       |
| PAFAH1B3     | 0.0014  | 1.11        | 1.59                      | 1.76                      | LOC100996286  | 0.0016  | -1.67       | 1.94                      | 1.16                      | KDM7A        | 0.0005  | 1.18        | 1.33                      | 1.58                      |
| LOC101060038 | 0.0023  | -1.45       | 1.98                      | 1.37                      | DENND6A       | 0.0008  | -1.24       | 1.71                      | 1.39                      | MYO1F        | 0.0066  | -1.34       | 1.67                      | 1.24                      |
| ARIH2        | 0.0002  | 1.35        | 1.42                      | 1.92                      | INPP4B        | 0.0052  | 1.16        | 1.43                      | 1.67                      | OASL         | 0.0084  | 1.28        | 1.28                      | 1.63                      |
| NEMP2        | 0.0025  | -1.09       | 1.74                      | 1.59                      | LOC101929947  | 0.0027  | -1.12       | 1.64                      | 1.46                      | FYB          | 0.0001  | -1.55       | 1.76                      | 1.14                      |
| NMRK1        | 0.0026  | -1.58       | 2.04                      | 1.29                      | ATF7IP2       | 0.0011  | -1.78       | 1.98                      | 1.11                      | HIST1H2BE    | 0.0068  | 1.29        | 1.27                      | 1.63                      |
| CCNL1        | 0.0026  | -1.46       | 1.97                      | 1.36                      | CYTH4         | 0.0017  | -1.51       | 1.86                      | 1.23                      | LZTFL1       | 0.0061  | -1.08       | 1.51                      | 1.39                      |
| BIN2         | 0.0001  | -1.7        | 2.09                      | 1.23                      | SLC46A3       | 0.0003  | -1.66       | 1.93                      | 1.16                      | SENP7        | 0.0004  | -1.44       | 1.71                      | 1.19                      |
| BNIP3        | 0.0004  | 1.96        | 1.12                      | 2.19                      | CD9           | 0.0020  | -1.16       | 1.66                      | 1.43                      | ITGAX        | 0.0065  | -1.79       | 1.85                      | 1.04                      |
| SATB1        | 0.0000  | 1.12        | 1.56                      | 1.74                      | ERMP1         | 0.0017  | -1.13       | 1.64                      | 1.45                      | ATP8B2       | 0.0048  | -1.16       | 1.55                      | 1.34                      |
| HS3ST3B1     | 0.0002  | -1.7        | 2.07                      | 1.22                      | IFI6          | 0.0076  | -1.31       | 1.75                      | 1.34                      | TMEM70       | 0.0026  | 1.45        | 1.18                      | 1.71                      |
| SNORD111B    | 0.0022  | -1.13       | 1.74                      | 1.55                      | MSL3          | 0.0016  | -1.29       | 1.74                      | 1.35                      | EZH1         | 0.0012  | -1.55       | 1.75                      | 1.13                      |
| GSDMA        | 0.0004  | -1.22       | 1.81                      | 1.48                      | ATP6V0A1      | 0.0089  | -1.25       | 1.71                      | 1.37                      | MYLIP        | 0.0001  | -1.57       | 1.76                      | 1.12                      |
| GSTM4        | 0.0059  | -1.22       | 1.81                      | 1.48                      | C5            | 0.0083  | -1.42       | 1.81                      | 1.27                      | CRIP1        | 0.0001  | -1.22       | 1.58                      | 1.3                       |
| ZNF92        | 0.0046  | -1.24       | 1.82                      | 1.47                      | CREBZF        | 0.0059  | -1.14       | 1.64                      | 1.44                      | HIST1H2BN    | 0.0008  | -1.21       | 1.58                      | 1.3                       |
| THADA        | 0.0000  | -1.13       | 1.74                      | 1.54                      | OLFM2         | 0.0075  | -1.33       | 1.76                      | 1.32                      | KLHDC7B      | 0.0056  | -1.52       | 1.73                      | 1.14                      |
| IFT80        | 0.0000  | -1.62       | 2.03                      | 1.25                      | PDK1          | 0.0004  | 1.33        | 1.32                      | 1.76                      | MALAT1       | 0.0015  | -1.14       | 1.53                      | 1.34                      |
| PICALM       | 0.0005  | -1.07       | 1.69                      | 1.58                      | FASTKD3       | 0.0064  | 1.02        | 1.52                      | 1.55                      | MXR47        | 0.0052  | -1.33       | 1.64                      | 1.23                      |
| GNAI3        | 0.0058  | 1.07        | 1.58                      | 1.68                      | BFSPI         | 0.0027  | -1.36       | 1.77                      | 1.3                       | TAS2R9       | 0.0063  | 1.16        | 1.33                      | 1.54                      |
| IFT88        | 0.0020  | 1.03        | 1.6                       | 1.66                      | DHX32         | 0.0002  | 1.35        | 1.31                      | 1.76                      | ABCA5        | 0.0028  | -1.15       | 1.53                      | 1.33                      |
| ER12         | 0.0028  | -1.26       | 1.82                      | 1.44                      | DTX3L         | 0.0017  | 1.01        | 1.52                      | 1.53                      | NRSN2        | 0.0051  | 1.16        | 1.32                      | 1.54                      |
| CDC25B       | 0.0001  | -1.83       | 2.1                       | 1.15                      | AAED1         | 0.0046  | 1.13        | 1.43                      | 1.62                      | POLG2        | 0.0085  | -1.12       | 1.51                      | 1.35                      |
| PCCA         | 0.0016  | -1.03       | 1.65                      | 1.6                       | HIST1H2AL     | 0.0007  | 1.34        | 1.3                       | 1.75                      | LOC105371870 | 0.0053  | -1.39       | 1.66                      | 1.2                       |
| LRRC8C       | 0.0077  | -1.66       | 2.02                      | 1.22                      | SNTB2         | 0.0033  | -1.13       | 1.62                      | 1.43                      | ZNF37BP      | 0.0057  | -1.38       | 1.66                      | 1.2                       |
| SERPINB1     | 0.0007  | -1.24       | 1.79                      | 1.45                      | TPT1          | 0.0003  | -1.35       | 1.75                      | 1.3                       | ZNF91        | 0.0001  | -1.41       | 1.67                      | 1.19                      |
| APPL1        | 0.0004  | 1.07        | 1.56                      | 1.67                      | GOLGA2P5      | 0.0093  | -1.18       | 1.64                      | 1.4                       | MGAT4A       | 0.0006  | -1.32       | 1.62                      | 1.23                      |
| VPS8         | 0.0024  | -1.04       | 1.65                      | 1.58                      | LRRC39        | 0.0031  | -1.14       | 1.62                      | 1.42                      | CFL2         | 0.0082  | -1.22       | 1.56                      | 1.28                      |
| FAM214A      | 0.0001  | -1.35       | 1.85                      | 1.37                      | ORMDL3        | 0.0001  | -1.31       | 1.72                      | 1.32                      | LUC7L        | 0.0029  | -1.27       | 1.59                      | 1.25                      |
| CLUAP1       | 0.0005  | -1.02       | 1.63                      | 1.59                      | LONP2         | 0.0055  | -1.73       | 1.92                      | 1.11                      | PPP2R5C      | 0.0001  | -1.45       | 1.68                      | 1.16                      |
| SSH2         | 0.0006  | -1.06       | 1.66                      | 1.56                      | LINS1         | 0.0024  | -1.13       | 1.6                       | 1.42                      | CECR5        | 0.0055  | 1.36        | 1.2                       | 1.63                      |
| DTNBP1       | 0.0008  | -1.23       | 1.78                      | 1.44                      | SIAE          | 0.0065  | -1.04       | 1.54                      | 1.48                      | MAN2A1       | 0.0091  | -1.3        | 1.6                       | 1.23                      |
| MFGES        | 0.0001  | -1.54       | 1.95                      | 1.26                      | DKFZP586I1420 | 0.0007  | -1.68       | 1.89                      | 1.12                      | PRMT2        | 0.0026  | -1.41       | 1.66                      | 1.17                      |

| Genes        | P-value | Fold Change |                           |                           | Genes        | P-value | Fold Change |                           |                           | Genes        | P-value | Fold Change |                           |                           |
|--------------|---------|-------------|---------------------------|---------------------------|--------------|---------|-------------|---------------------------|---------------------------|--------------|---------|-------------|---------------------------|---------------------------|
|              |         | 28z vs BB-z | 28-AIL2RB-z (YXXQ) vs 28z | 28-AIL2RB-z (YXXQ) vs BBz |              |         | 28z vs BB-z | 28-AIL2RB-z (YXXQ) vs 28z | 28-AIL2RB-z (YXXQ) vs BBz |              |         | 28z vs BB-z | 28-AIL2RB-z (YXXQ) vs 28z | 28-AIL2RB-z (YXXQ) vs BBz |
| PROK2        | 0.0001  | 1.26        | 1.25                      | 1.58                      | NAPEPLD      | 0.0015  | -1.33       | 1.51                      | 1.13                      | TRBV4-2      | 0.0088  | -1.77       | 1.63                      | -1.09                     |
| CD226        | 0.0082  | 1.36        | 1.2                       | 1.62                      | EPB41        | 0.0003  | -1.53       | 1.59                      | 1.04                      | AK4          | 0.0018  | 1.63        | -1.04                     | 1.57                      |
| CLIP4        | 0.0021  | -1.25       | 1.57                      | 1.25                      | ATP8A1       | 0.0012  | -1.37       | 1.52                      | 1.11                      | REG4         | 0.0002  | -1.87       | 1.66                      | -1.13                     |
| LOC100130798 | 0.0009  | 1.18        | 1.3                       | 1.52                      | CCDC7        | 0.0047  | -1.36       | 1.51                      | 1.11                      | TRBJ2-2      | 0.0041  | -1.9        | 1.67                      | -1.14                     |
| BIRC2        | 0.0015  | -1.41       | 1.65                      | 1.17                      | INSIG1       | 0.0007  | -1.46       | 1.56                      | 1.06                      | HACD4        | 0.0000  | -1.54       | 1.53                      | -1.01                     |
| FAM21C       | 0.0020  | -1.55       | 1.71                      | 1.1                       | LINC00969    | 0.0030  | -1.43       | 1.54                      | 1.08                      | KIAA0825     | 0.0032  | -1.59       | 1.55                      | -1.03                     |
| TRBV3-1      | 0.0019  | -1.75       | 1.79                      | 1.02                      | LOC105369699 | 0.0045  | 1.34        | 1.12                      | 1.5                       | SLFN5        | 0.0001  | -1.88       | 1.66                      | -1.14                     |
| ATF2         | 0.0000  | -1.31       | 1.59                      | 1.22                      | LRRC37A2     | 0.0005  | -1.34       | 1.5                       | 1.12                      | CD84         | 0.0007  | -1.77       | 1.61                      | -1.1                      |
| ETHE1        | 0.0013  | -1.18       | 1.52                      | 1.29                      | LSR          | 0.0001  | -1.47       | 1.56                      | 1.06                      | PRSS1        | 0.0004  | -1.84       | 1.64                      | -1.13                     |
| NIFK         | 0.0062  | -1.15       | 1.5                       | 1.31                      | RDM1         | 0.0080  | 1.35        | 1.11                      | 1.5                       | HLA-DPB2     | 0.0039  | -2.27       | 1.78                      | -1.28                     |
| YPEL1        | 0.0030  | -1.18       | 1.52                      | 1.29                      | GTF2IP4      | 0.0000  | -1.59       | 1.6                       | 1                         | LONRF1       | 0.0050  | 1.57        | -1.03                     | 1.53                      |
| SAMD3        | 0.0012  | -1.42       | 1.65                      | 1.16                      | MIR4770      | 0.0064  | 1.51        | 1.03                      | 1.56                      | RABGAP1L     | 0.0000  | -1.63       | 1.55                      | -1.05                     |
| TMEM198B     | 0.0003  | -1.72       | 1.77                      | 1.03                      | CNN2         | 0.0006  | -1.44       | 1.53                      | 1.06                      | SBF2         | 0.0024  | 1.52        | -1.01                     | 1.51                      |
| HEATR3       | 0.0021  | 1.22        | 1.26                      | 1.54                      | HSD17B11     | 0.0001  | -1.43       | 1.52                      | 1.07                      | DNAJB1       | 0.0039  | -1.55       | 1.51                      | -1.02                     |
| KIAA1551     | 0.0003  | -1.29       | 1.58                      | 1.22                      | TTC14        | 0.0081  | -1.44       | 1.53                      | 1.06                      | TRAJ50       | 0.0036  | -1.52       | 1.5                       | -1.01                     |
| THEM4        | 0.0019  | -1.22       | 1.54                      | 1.26                      | ALPK1        | 0.0041  | -1.5        | 1.55                      | 1.03                      | TRBJ2-3      | 0.0059  | -1.66       | 1.56                      | -1.07                     |
| TMEM116      | 0.0013  | -1.22       | 1.54                      | 1.26                      | PATZ1        | 0.0012  | -1.48       | 1.54                      | 1.04                      | TRBV19       | 0.0040  | -1.64       | 1.55                      | -1.06                     |
| BRWD3        | 0.0004  | -1.22       | 1.53                      | 1.26                      | SPOCK2       | 0.0038  | -1.45       | 1.51                      | 1.04                      | BCAS3        | 0.0003  | -1.92       | 1.65                      | -1.17                     |
| CDHR1        | 0.0059  | 1.18        | 1.28                      | 1.51                      | TRBV20-1     | 0.0018  | -1.5        | 1.52                      | 1.01                      | EPAS1        | 0.0031  | 2.41        | -1.33                     | 1.81                      |
| N4BP2L2-IT2  | 0.0001  | -1.23       | 1.54                      | 1.25                      | MYC          | 0.0013  | 1.5         | 1.01                      | 1.51                      | FAM65B       | 0.0001  | -2.04       | 1.69                      | -1.21                     |
| ODF2L        | 0.0021  | -1.23       | 1.54                      | 1.25                      | TRBV9        | 0.0063  | -1.51       | 1.52                      | 1                         | NAP1L4       | 0.0001  | -1.65       | 1.55                      | -1.07                     |
| SNRPN        | 0.0062  | -1.3        | 1.58                      | 1.21                      | GPR155       | 0.0003  | -3.35       | 3.12                      | -1.07                     | PNRC1        | 0.0009  | -1.55       | 1.51                      | -1.03                     |
| APH1B        | 0.0002  | -1.24       | 1.54                      | 1.24                      | TCF7         | 0.0001  | -5.83       | 3.33                      | -1.75                     | RPS6KA3      | 0.0000  | -1.66       | 1.55                      | -1.07                     |
| DDX26B       | 0.0002  | -1.4        | 1.62                      | 1.16                      | FCMR         | 0.0009  | -3.31       | 2.65                      | -1.25                     | SLFN13       | 0.0084  | 1.68        | -1.08                     | 1.56                      |
| GABPB1       | 0.0012  | 1.19        | 1.26                      | 1.51                      | GZMK         | 0.0001  | -4.39       | 2.88                      | -1.53                     | ITM2B        | 0.0002  | -1.5        | 1.49                      | -1.01                     |
| LOC100506100 | 0.0014  | -1.34       | 1.59                      | 1.18                      | YPEL3        | 0.0026  | -2.62       | 2.35                      | -1.11                     | CD52         | 0.0016  | -1.76       | 1.58                      | -1.11                     |
| TBC1D31      | 0.0018  | 1.31        | 1.2                       | 1.57                      | STK38        | 0.0001  | -2.22       | 2.21                      | -1                        | WDTC1        | 0.0027  | -1.67       | 1.55                      | -1.08                     |
| ZC3H12B      | 0.0003  | -1.28       | 1.55                      | 1.22                      | TRANK1       | 0.0000  | -2.3        | 2.2                       | -1.04                     | FAM13B       | 0.0005  | -1.81       | 1.59                      | -1.13                     |
| RNASEH2B     | 0.0005  | -1.43       | 1.63                      | 1.14                      | TUBA1A       | 0.0001  | -2.68       | 2.3                       | -1.17                     | ABCD2        | 0.0001  | -1.63       | 1.53                      | -1.07                     |
| PAM          | 0.0049  | 1.21        | 1.25                      | 1.51                      | IL6ST        | 0.0001  | -2.11       | 2.11                      | -1                        | XBPI         | 0.0014  | 1.67        | -1.08                     | 1.54                      |
| TMX4         | 0.0007  | -1.34       | 1.58                      | 1.18                      | FAM102A      | 0.0002  | -2.8        | 2.27                      | -1.24                     | TRBV6-5      | 0.0070  | -1.51       | 1.48                      | -1.02                     |
| GALNT3       | 0.0012  | 1.67        | 1.03                      | 1.72                      | PIK3IP1      | 0.0063  | -2.37       | 2.13                      | -1.12                     | AGBL2        | 0.0015  | -2.03       | 1.67                      | -1.22                     |
| LOC102724587 | 0.0077  | 1.72        | 1.01                      | 1.74                      | CALCOCO1     | 0.0000  | -2.17       | 2.01                      | -1.08                     | GTF2IRD2     | 0.0054  | -1.65       | 1.53                      | -1.08                     |
| GAS5         | 0.0073  | -1.48       | 1.64                      | 1.11                      | PGAP1        | 0.0039  | 2.1         | -1.06                     | 1.98                      | ZNF17        | 0.0019  | -1.91       | 1.62                      | -1.18                     |
| LOC105377576 | 0.0049  | 1.22        | 1.24                      | 1.51                      | SCML4        | 0.0002  | -2.19       | 2.01                      | -1.09                     | MIR181B1     | 0.0011  | -1.98       | 1.64                      | -1.2                      |
| RTP4         | 0.0029  | -1.35       | 1.58                      | 1.17                      | TM6SF1       | 0.0033  | 3.69        | -1.53                     | 2.41                      | TSHR         | 0.0007  | -1.87       | 1.6                       | -1.17                     |
| CRBN         | 0.0000  | -1.38       | 1.59                      | 1.15                      | CCDC53       | 0.0000  | -1.92       | 1.89                      | -1.02                     | LINC00426    | 0.0012  | -1.95       | 1.63                      | -1.2                      |
| GLDC         | 0.0050  | 1.22        | 1.23                      | 1.51                      | FMO4         | 0.0013  | -1.92       | 1.89                      | -1.02                     | TXLNGY       | 0.0046  | -1.69       | 1.53                      | -1.1                      |
| STK3         | 0.0087  | 1.23        | 1.23                      | 1.51                      | PYHIN1       | 0.0017  | -1.93       | 1.88                      | -1.03                     | ANKRD10      | 0.0001  | -1.6        | 1.49                      | -1.07                     |
| PSITP4       | 0.0077  | 1.6         | 1.05                      | 1.68                      | LOC101929305 | 0.0002  | 2.38        | -1.19                     | 2                         | TRBV4-1      | 0.0000  | -1.69       | 1.52                      | -1.11                     |
| ACTR3C       | 0.0055  | -1.37       | 1.58                      | 1.15                      | MZB1         | 0.0017  | 1.89        | -1.03                     | 1.84                      | PRCP         | 0.0012  | -1.53       | 1.46                      | -1.05                     |
| CCDC18       | 0.0025  | -1.21       | 1.5                       | 1.23                      | ADHFE1       | 0.0010  | -1.89       | 1.83                      | -1.03                     | TCP11L2      | 0.0055  | -2.36       | 1.75                      | -1.35                     |
| NT5C2        | 0.0008  | -1.36       | 1.57                      | 1.16                      | BTN3A3       | 0.0015  | -1.99       | 1.87                      | -1.07                     | CCDC64       | 0.0056  | -1.52       | 1.45                      | -1.05                     |
| ZNF585A      | 0.0047  | -1.22       | 1.5                       | 1.23                      | CTSO         | 0.0039  | -2.26       | 1.94                      | -1.16                     | SLC25A46     | 0.0001  | -1.52       | 1.45                      | -1.05                     |
| DDX58        | 0.0012  | -1.64       | 1.69                      | 1.03                      | EOMES        | 0.0030  | -2.06       | 1.88                      | -1.1                      | SAMD9        | 0.0001  | -1.7        | 1.51                      | -1.12                     |
| N4BP2L1      | 0.0004  | -1.59       | 1.67                      | 1.05                      | MVBI2B       | 0.0001  | -1.89       | 1.81                      | -1.05                     | MGC70870     | 0.0058  | -1.55       | 1.45                      | -1.07                     |
| KBTBD3       | 0.0013  | -1.39       | 1.58                      | 1.14                      | ILIRAP       | 0.0003  | 2.5         | -1.26                     | 1.99                      | HLA-DPB1     | 0.0083  | -2.13       | 1.66                      | -1.29                     |
| NLRP1        | 0.0003  | -1.27       | 1.52                      | 1.2                       | TRAV8-3      | 0.0001  | -1.86       | 1.77                      | -1.06                     | RUNX2        | 0.0004  | -1.67       | 1.49                      | -1.12                     |
| S100A10      | 0.0000  | -1.38       | 1.58                      | 1.14                      | METTL7A      | 0.0001  | -2.61       | 2.01                      | -1.3                      | LOC105369652 | 0.0058  | -1.55       | 1.44                      | -1.08                     |
| CCDC146      | 0.0010  | -1.71       | 1.71                      | 1                         | IL7R         | 0.0035  | -2.88       | 2.08                      | -1.38                     | HBPI         | 0.0000  | -1.53       | 1.42                      | -1.07                     |
| SLC39A10     | 0.0059  | 1.26        | 1.2                       | 1.51                      | LINC00324    | 0.0043  | -1.88       | 1.77                      | -1.07                     | KLF9         | 0.0019  | 1.85        | -1.2                      | 1.54                      |
| RNF144A      | 0.0015  | 1.37        | 1.14                      | 1.56                      | YPEL5        | 0.0010  | -1.76       | 1.72                      | -1.03                     | PWAR5        | 0.0041  | 1.69        | -1.14                     | 1.48                      |
| SERINC5      | 0.0000  | -1.45       | 1.6                       | 1.1                       | LEF1         | 0.0000  | -2.14       | 1.82                      | -1.17                     | TRBV20OR9-2  | 0.0005  | -1.68       | 1.48                      | -1.14                     |
| BTN3A2       | 0.0023  | -1.44       | 1.59                      | 1.1                       | CREB3L3      | 0.0011  | -1.75       | 1.68                      | -1.04                     | IMPACT       | 0.0054  | -1.54       | 1.42                      | -1.08                     |
| AOAH         | 0.0048  | -1.61       | 1.66                      | 1.03                      | CLK4         | 0.0000  | -1.68       | 1.65                      | -1.02                     | PARP15       | 0.0010  | -1.59       | 1.44                      | -1.1                      |
| ERP27        | 0.0058  | -1.64       | 1.67                      | 1.02                      | EPST11       | 0.0004  | -1.75       | 1.68                      | -1.05                     | HOOK1        | 0.0065  | 2.42        | -1.4                      | 1.73                      |
| ANXA5        | 0.0054  | -1.36       | 1.55                      | 1.14                      | H3F3A        | 0.0014  | -1.63       | 1.62                      | -1                        | ZBED6        | 0.0021  | -1.51       | 1.41                      | -1.08                     |
| LOC100505549 | 0.0009  | -1.33       | 1.53                      | 1.15                      | TRBV28       | 0.0031  | -2.17       | 1.81                      | -1.2                      | LOC105373934 | 0.0065  | -1.78       | 1.5                       | -1.18                     |
| C9orf72      | 0.0009  | 1.29        | 1.16                      | 1.5                       | PARP8        | 0.0001  | -1.65       | 1.62                      | -1.02                     | PARP12       | 0.0074  | -1.59       | 1.43                      | -1.11                     |
| GUSBP5       | 0.0070  | -1.35       | 1.53                      | 1.13                      | APOL3        | 0.0094  | -1.73       | 1.65                      | -1.05                     | JCHAIN       | 0.0030  | -1.87       | 1.53                      | -1.22                     |
| LINC01578    | 0.0013  | -1.33       | 1.52                      | 1.14                      | GTF2IP1      | 0.0000  | -1.59       | 1.59                      | -1                        | KLRC4        | 0.0000  | -1.92       | 1.53                      | -1.25                     |
| XRN1         | 0.0012  | -1.39       | 1.55                      | 1.11                      | HLA-DMA      | 0.0025  | -2.21       | 1.81                      | -1.22                     | PPP3CB       | 0.0000  | -1.78       | 1.48                      | -1.2                      |
| RALGDS       | 0.0005  | -1.37       | 1.53                      | 1.12                      | CD27         | 0.0007  | -1.81       | 1.66                      | -1.09                     | CAMK4        | 0.0007  | -1.64       | 1.42                      | -1.15                     |
| SLC44A1      | 0.0003  | -1.37       | 1.53                      | 1.12                      | AKAP13       | 0.0000  | -1.61       | 1.58                      | -1.02                     | CREBRF       | 0.0000  | -1.57       | 1.4                       | -1.13                     |
| SAMD9L       | 0.0004  | -1.6        | 1.63                      | 1.02                      | ZNF362       | 0.0092  | -1.64       | 1.59                      | -1.03                     | SIPR1        | 0.0001  | -1.59       | 1.4                       | -1.14                     |
| BTN3A1       | 0.0003  | -1.47       | 1.57                      | 1.07                      | CDKN1B       | 0.0007  | -1.58       | 1.56                      | -1.01                     | TRAJ3        | 0.0014  | -1.5        | 1.36                      | -1.1                      |
| SAT1         | 0.0035  | -1.35       | 1.52                      | 1.12                      | SLAMF7       | 0.0003  | -1.73       | 1.62                      | -1.07                     | TRAJ35       | 0.0086  | -1.83       | 1.49                      | -1.23                     |
| EVI2A        | 0.0052  | -1.32       | 1.5                       | 1.14                      | HERC6        | 0.0029  | -1.92       | 1.68                      | -1.14                     | TRAJ56       | 0.0092  | -1.67       | 1.43                      | -1.17                     |

| Genes               | P-value | Fold Change |                           |                           | Genes               | P-value | Fold Change |                           |                           | Genes               | P-value | Fold Change |                           |                           |
|---------------------|---------|-------------|---------------------------|---------------------------|---------------------|---------|-------------|---------------------------|---------------------------|---------------------|---------|-------------|---------------------------|---------------------------|
|                     |         | 28z vs BB-z | 28-AIL2RB-z (YXXQ) vs 28z | 28-AIL2RB-z (YXXQ) vs BBz |                     |         | 28z vs BB-z | 28-AIL2RB-z (YXXQ) vs 28z | 28-AIL2RB-z (YXXQ) vs BBz |                     |         | 28z vs BB-z | 28-AIL2RB-z (YXXQ) vs 28z | 28-AIL2RB-z (YXXQ) vs BBz |
| <i>SORL1</i>        | 0.0009  | -2.05       | 1.56                      | -1.31                     | <i>LOC105376895</i> | 0.0077  | -1.53       | 1.23                      | -1.24                     | <i>GARS</i>         | 0.0003  | 2.17        | -1.6                      | 1.36                      |
| <i>LOC153684</i>    | 0.0027  | -1.56       | 1.38                      | -1.13                     | <i>CECR1</i>        | 0.0004  | -2.2        | 1.47                      | -1.49                     | <i>LOC105369536</i> | 0.0015  | -1.78       | 1.22                      | -1.46                     |
| <i>TNRC6C</i>       | 0.0013  | -1.66       | 1.42                      | -1.17                     | <i>EHD3</i>         | 0.0048  | -2.2        | 1.47                      | -1.49                     | <i>MTX2</i>         | 0.0015  | 1.59        | -1.39                     | 1.15                      |
| <i>PGM2L1</i>       | 0.0008  | -1.69       | 1.42                      | -1.19                     | <i>HLA-DPA1</i>     | 0.0095  | -1.88       | 1.36                      | -1.39                     | <i>TBC1D24</i>      | 0.0011  | 1.9         | -1.51                     | 1.26                      |
| <i>PRNP</i>         | 0.0001  | 1.55        | -1.14                     | 1.36                      | <i>HOMER1</i>       | 0.0011  | 1.58        | -1.27                     | 1.24                      | <i>NARS</i>         | 0.0001  | 1.62        | -1.4                      | 1.15                      |
| <i>BZRAP1</i>       | 0.0004  | -1.98       | 1.52                      | -1.3                      | <i>ZC3H12D</i>      | 0.0041  | -2.48       | 1.55                      | -1.59                     | <i>DDIT3</i>        | 0.0038  | 2.06        | -1.57                     | 1.31                      |
| <i>APOLD1</i>       | 0.0019  | -1.85       | 1.47                      | -1.25                     | <i>CPPED1</i>       | 0.0040  | 1.54        | -1.26                     | 1.22                      | <i>SSBP2</i>        | 0.0001  | -2.61       | 1.49                      | -1.75                     |
| <i>TBCEL</i>        | 0.0022  | -1.75       | 1.44                      | -1.22                     | <i>PSMG1</i>        | 0.0003  | 1.74        | -1.34                     | 1.3                       | <i>CENPV</i>        | 0.0072  | 1.61        | -1.41                     | 1.15                      |
| <i>FAM129A</i>      | 0.0003  | -1.56       | 1.36                      | -1.15                     | <i>TUBGCP4</i>      | 0.0007  | 1.56        | -1.27                     | 1.23                      | <i>SNRK</i>         | 0.0001  | -1.65       | 1.16                      | -1.42                     |
| <i>TRDC</i>         | 0.0032  | -1.8        | 1.45                      | -1.24                     | <i>FIGNL1</i>       | 0.0022  | 1.57        | -1.28                     | 1.23                      | <i>P4HA1</i>        | 0.0003  | 1.69        | -1.44                     | 1.17                      |
| <i>GCLM</i>         | 0.0000  | 1.53        | -1.14                     | 1.34                      | <i>GRPEL2</i>       | 0.0005  | 1.75        | -1.35                     | 1.3                       | <i>AP4E1</i>        | 0.0092  | 1.56        | -1.4                      | 1.12                      |
| <i>RAB5B</i>        | 0.0011  | -1.63       | 1.38                      | -1.18                     | <i>HGSNAT</i>       | 0.0005  | -1.65       | 1.26                      | -1.31                     | <i>LRRC8D</i>       | 0.0062  | -1.54       | 1.11                      | -1.39                     |
| <i>CLIP3</i>        | 0.0069  | -1.54       | 1.34                      | -1.15                     | <i>RAPGEF4</i>      | 0.0072  | -1.57       | 1.23                      | -1.28                     | <i>TRAJ34</i>       | 0.0042  | -1.52       | 1.1                       | -1.38                     |
| <i>LOC101927746</i> | 0.0094  | 1.57        | -1.16                     | 1.35                      | <i>SLC43A1</i>      | 0.0080  | 1.81        | -1.37                     | 1.32                      | <i>UBE2MP1</i>      | 0.0087  | 1.57        | -1.4                      | 1.12                      |
| <i>LOC105376146</i> | 0.0033  | 1.82        | -1.26                     | 1.45                      | <i>TMEM147</i>      | 0.0035  | 1.57        | -1.28                     | 1.23                      | <i>DES1</i>         | 0.0013  | 1.94        | -1.54                     | 1.26                      |
| <i>RSRP1</i>        | 0.0004  | -1.64       | 1.38                      | -1.19                     | <i>YARS</i>         | 0.0014  | 1.73        | -1.34                     | 1.29                      | <i>MLLT3</i>        | 0.0005  | 1.62        | -1.42                     | 1.14                      |
| <i>TRAV41</i>       | 0.0036  | -1.66       | 1.39                      | -1.2                      | <i>SLC12A6</i>      | 0.0004  | -1.87       | 1.34                      | -1.4                      | <i>CIITA</i>        | 0.0020  | -2.65       | 1.49                      | -1.78                     |
| <i>CCDC28A</i>      | 0.0093  | -1.55       | 1.34                      | -1.16                     | <i>SRPB1</i>        | 0.0085  | -1.76       | 1.3                       | -1.36                     | <i>TARS</i>         | 0.0008  | 1.6         | -1.42                     | 1.13                      |
| <i>MIR2114</i>      | 0.0071  | 1.75        | -1.24                     | 1.42                      | <i>IKBKE</i>        | 0.0033  | -1.68       | 1.26                      | -1.33                     | <i>LOC102724463</i> | 0.0088  | -1.59       | 1.12                      | -1.42                     |
| <i>CEBPB</i>        | 0.0001  | 2.03        | -1.34                     | 1.51                      | <i>NDUFAF2</i>      | 0.0041  | 1.6         | -1.3                      | 1.23                      | <i>LPP</i>          | 0.0031  | 1.69        | -1.46                     | 1.16                      |
| <i>ATM</i>          | 0.0000  | -1.84       | 1.44                      | -1.27                     | <i>RWDD2B</i>       | 0.0003  | -1.5        | 1.19                      | -1.26                     | <i>TAF9B</i>        | 0.0000  | -1.67       | 1.15                      | -1.45                     |
| <i>PDIA5</i>        | 0.0060  | 1.66        | -1.21                     | 1.38                      | <i>USP12</i>        | 0.0012  | 1.58        | -1.29                     | 1.22                      | <i>DDX21</i>        | 0.0085  | 1.52        | -1.4                      | 1.09                      |
| <i>CUX1</i>         | 0.0033  | -1.51       | 1.31                      | -1.15                     | <i>SLC3A2</i>       | 0.0040  | 2.69        | -1.68                     | 1.6                       | <i>PTPN3</i>        | 0.0025  | -1.74       | 1.17                      | -1.48                     |
| <i>HIPK1</i>        | 0.0000  | -1.6        | 1.34                      | -1.19                     | <i>ERRF1</i>        | 0.0086  | 1.59        | -1.3                      | 1.22                      | <i>EPRS</i>         | 0.0003  | 1.59        | -1.43                     | 1.11                      |
| <i>RORA</i>         | 0.0025  | -1.54       | 1.32                      | -1.17                     | <i>HOXB9</i>        | 0.0033  | 1.81        | -1.39                     | 1.3                       | <i>POU5F1P4</i>     | 0.0099  | 1.5         | -1.4                      | 1.08                      |
| <i>TRAV26-1</i>     | 0.0019  | -1.6        | 1.34                      | -1.19                     | <i>MT2A</i>         | 0.0080  | -1.52       | 1.19                      | -1.28                     | <i>PRPF6</i>        | 0.0054  | -1.51       | 1.08                      | -1.4                      |
| <i>TRAJ32</i>       | 0.0011  | -1.55       | 1.32                      | -1.18                     | <i>NLK</i>          | 0.0004  | -1.62       | 1.23                      | -1.32                     | <i>PASK</i>         | 0.0013  | -1.94       | 1.24                      | -1.56                     |
| <i>HK2</i>          | 0.0024  | 2.07        | -1.37                     | 1.51                      | <i>WDR48</i>        | 0.0005  | -1.62       | 1.23                      | -1.32                     | <i>TEC</i>          | 0.0010  | -1.79       | 1.19                      | -1.51                     |
| <i>INPP5K</i>       | 0.0009  | -1.52       | 1.3                       | -1.17                     | <i>LOC105371692</i> | 0.0047  | -1.78       | 1.28                      | -1.38                     | <i>HAX1</i>         | 0.0057  | 1.75        | -1.49                     | 1.17                      |
| <i>TRAV12-3</i>     | 0.0035  | -1.54       | 1.31                      | -1.18                     | <i>TRGJP2</i>       | 0.0000  | -1.64       | 1.23                      | -1.33                     | <i>ARPC5L</i>       | 0.0019  | 1.54        | -1.42                     | 1.09                      |
| <i>PRDM8</i>        | 0.0018  | -1.9        | 1.44                      | -1.31                     | <i>DIAPH3</i>       | 0.0044  | 1.64        | -1.34                     | 1.23                      | <i>CTPS1</i>        | 0.0042  | 1.57        | -1.43                     | 1.1                       |
| <i>NLRC5</i>        | 0.0002  | -1.64       | 1.34                      | -1.22                     | <i>IPCEF1</i>       | 0.0015  | -1.85       | 1.3                       | -1.42                     | <i>FRMD4B</i>       | 0.0000  | 1.77        | -1.51                     | 1.18                      |
| <i>ODC1</i>         | 0.0093  | 1.58        | -1.2                      | 1.32                      | <i>LINC00662</i>    | 0.0069  | 1.84        | -1.42                     | 1.3                       | <i>PXK</i>          | 0.0006  | 1.56        | -1.43                     | 1.09                      |
| <i>ZCCHC8</i>       | 0.0006  | 1.54        | -1.18                     | 1.3                       | <i>LOC105377891</i> | 0.0004  | -1.9        | 1.32                      | -1.44                     | <i>CCR4</i>         | 0.0079  | -1.9        | 1.22                      | -1.56                     |
| <i>CCR7</i>         | 0.0012  | -1.77       | 1.39                      | -1.27                     | <i>ATF4</i>         | 0.0043  | 1.59        | -1.32                     | 1.2                       | <i>SCD</i>          | 0.0002  | 1.65        | -1.47                     | 1.13                      |
| <i>LOC101928100</i> | 0.0000  | -1.96       | 1.46                      | -1.34                     | <i>RSL24D1</i>      | 0.0000  | 1.62        | -1.33                     | 1.21                      | <i>ZBED2</i>        | 0.0022  | 2.72        | -1.83                     | 1.48                      |
| <i>NUDCD1</i>       | 0.0039  | 1.55        | -1.2                      | 1.3                       | <i>SLC16A1</i>      | 0.0025  | 1.86        | -1.43                     | 1.3                       | <i>UBE2E2</i>       | 0.0018  | 1.53        | -1.43                     | 1.07                      |
| <i>FAM27E3</i>      | 0.0010  | 2.27        | -1.47                     | 1.55                      | <i>IFRD2</i>        | 0.0092  | 1.5         | -1.3                      | 1.16                      | <i>TRGV9</i>        | 0.0019  | -1.68       | 1.13                      | -1.49                     |
| <i>ARID4B</i>       | 0.0003  | -1.59       | 1.3                       | -1.22                     | <i>ITGA2</i>        | 0.0006  | 1.63        | -1.35                     | 1.21                      | <i>AP3M2</i>        | 0.0062  | 1.52        | -1.43                     | 1.06                      |
| <i>BACH1-IT2</i>    | 0.0068  | 1.63        | -1.24                     | 1.32                      | <i>YME1L1</i>       | 0.0030  | -1.53       | 1.17                      | -1.31                     | <i>CKAP2L</i>       | 0.0018  | 1.51        | -1.43                     | 1.06                      |
| <i>LOC102724601</i> | 0.0016  | -2.05       | 1.47                      | -1.39                     | <i>CRLF2</i>        | 0.0040  | -1.83       | 1.28                      | -1.43                     | <i>ELK1</i>         | 0.0047  | 1.61        | -1.47                     | 1.1                       |
| <i>MYB</i>          | 0.0001  | -1.79       | 1.38                      | -1.3                      | <i>LRP8</i>         | 0.0050  | 1.93        | -1.47                     | 1.32                      | <i>IFRD1</i>        | 0.0010  | 1.61        | -1.47                     | 1.1                       |
| <i>KLHL24</i>       | 0.0026  | -2.18       | 1.51                      | -1.44                     | <i>C9orf91</i>      | 0.0039  | 1.5         | -1.3                      | 1.15                      | <i>CARD6</i>        | 0.0001  | -1.72       | 1.14                      | -1.51                     |
| <i>MTSS1L</i>       | 0.0036  | -1.65       | 1.32                      | -1.25                     | <i>CHAC1</i>        | 0.0020  | 5.83        | -2.49                     | 2.34                      | <i>DLG3</i>         | 0.0001  | 1.75        | -1.52                     | 1.15                      |
| <i>RAP1GAP2</i>     | 0.0002  | -1.55       | 1.28                      | -1.21                     | <i>WIPI1</i>        | 0.0001  | 2.2         | -1.56                     | 1.4                       | <i>LYRM1</i>        | 0.0000  | 1.94        | -1.59                     | 1.22                      |
| <i>WDR78</i>        | 0.0000  | -1.62       | 1.31                      | -1.24                     | <i>LRRC34</i>       | 0.0008  | 2.03        | -1.51                     | 1.34                      | <i>BPGM</i>         | 0.0001  | 1.5         | -1.43                     | 1.05                      |
| <i>LINC00954</i>    | 0.0060  | -1.61       | 1.3                       | -1.24                     | <i>NCOA1</i>        | 0.0043  | -1.57       | 1.17                      | -1.34                     | <i>CHAC2</i>        | 0.0008  | 1.57        | -1.46                     | 1.08                      |
| <i>MPP1</i>         | 0.0045  | 1.95        | -1.37                     | 1.43                      | <i>GM2A</i>         | 0.0050  | -1.76       | 1.24                      | -1.42                     | <i>EBNA1BP2</i>     | 0.0000  | 1.5         | -1.43                     | 1.05                      |
| <i>PTPRJ</i>        | 0.0007  | -1.72       | 1.34                      | -1.29                     | <i>LINC-PINT</i>    | 0.0046  | 1.96        | -1.49                     | 1.31                      | <i>UHRF1BP1L</i>    | 0.0003  | 1.56        | -1.45                     | 1.07                      |
| <i>RFXAP</i>        | 0.0029  | 1.7         | -1.28                     | 1.33                      | <i>LOC105378011</i> | 0.0004  | -1.86       | 1.28                      | -1.46                     | <i>ZC3H7A</i>       | 0.0003  | -1.6        | 1.09                      | -1.47                     |
| <i>RPF2</i>         | 0.0008  | 1.6         | -1.24                     | 1.29                      | <i>ARHGAP18</i>     | 0.0002  | 1.6         | -1.36                     | 1.18                      | <i>XPOT</i>         | 0.0002  | 1.73        | -1.52                     | 1.14                      |
| <i>TWSG1</i>        | 0.0056  | 1.55        | -1.22                     | 1.27                      | <i>HRH2</i>         | 0.0047  | 1.59        | -1.35                     | 1.17                      | <i>LONP1</i>        | 0.0006  | 2.15        | -1.67                     | 1.28                      |
| <i>WDR7</i>         | 0.0002  | -1.5        | 1.25                      | -1.2                      | <i>ABAT</i>         | 0.0032  | -2.11       | 1.36                      | -1.55                     | <i>TRGC2</i>        | 0.0006  | -1.59       | 1.08                      | -1.47                     |
| <i>CYTIP</i>        | 0.0001  | 1.51        | -1.21                     | 1.25                      | <i>KDM5B</i>        | 0.0043  | -1.77       | 1.24                      | -1.43                     | <i>LOC100506928</i> | 0.0014  | -1.52       | 1.05                      | -1.45                     |
| <i>SNORA84</i>      | 0.0023  | 1.88        | -1.35                     | 1.39                      | <i>MTHFD2</i>       | 0.0001  | 2.07        | -1.54                     | 1.34                      | <i>RLN3</i>         | 0.0005  | -1.58       | 1.07                      | -1.47                     |
| <i>MAP3K8</i>       | 0.0056  | -1.5        | 1.24                      | -1.21                     | <i>LOC101928421</i> | 0.0076  | -1.71       | 1.21                      | -1.41                     | <i>MALT1</i>        | 0.0000  | -1.73       | 1.13                      | -1.53                     |
| <i>SKA1</i>         | 0.0089  | 1.5         | -1.21                     | 1.24                      | <i>LOC101928979</i> | 0.0082  | -1.57       | 1.16                      | -1.36                     | <i>GDF11</i>        | 0.0003  | -1.72       | 1.12                      | -1.53                     |
| <i>TRAJ22</i>       | 0.0007  | -1.52       | 1.25                      | -1.22                     | <i>PDE3B</i>        | 0.0000  | -1.6        | 1.17                      | -1.37                     | <i>SARS</i>         | 0.0008  | 2.22        | -1.71                     | 1.3                       |
| <i>TSEN15</i>       | 0.0050  | 1.94        | -1.38                     | 1.41                      | <i>TSR1</i>         | 0.0003  | 1.5         | -1.33                     | 1.13                      | <i>NBPF20</i>       | 0.0058  | -1.51       | 1.04                      | -1.45                     |
| <i>MAL</i>          | 0.0051  | -1.93       | 1.4                       | -1.37                     | <i>SLC7A5</i>       | 0.0023  | 3.2         | -1.9                      | 1.69                      | <i>SHMT2</i>        | 0.0024  | 1.57        | -1.48                     | 1.07                      |
| <i>FAM84B</i>       | 0.0006  | 2.49        | -1.57                     | 1.59                      | <i>ALDH1L2</i>      | 0.0000  | 2.16        | -1.58                     | 1.37                      | <i>SLC8A1</i>       | 0.0042  | 1.84        | -1.58                     | 1.17                      |
| <i>NOTCH2NL</i>     | 0.0094  | -1.93       | 1.4                       | -1.38                     | <i>HSPA13</i>       | 0.0002  | 1.74        | -1.43                     | 1.22                      | <i>ARG2</i>         | 0.0017  | 1.7         | -1.53                     | 1.11                      |
| <i>TRAJ13</i>       | 0.0053  | -1.68       | 1.31                      | -1.29                     | <i>FKBP4</i>        | 0.0054  | 1.56        | -1.36                     | 1.15                      | <i>ATXN1</i>        | 0.0015  | -1.65       | 1.09                      | -1.51                     |
| <i>DDIT4</i>        | 0.0052  | 2.45        | -1.56                     | 1.56                      | <i>CYSLTR1</i>      | 0.0000  | -1.68       | 1.19                      | -1.41                     | <i>ORAI3</i>        | 0.0019  | -1.73       | 1.12                      | -1.54                     |
| <i>TRDJ2</i>        | 0.0074  | -1.99       | 1.41                      | -1.41                     | <i>ZER1</i>         | 0.0041  | -1.75       | 1.22                      | -1.44                     | <i>SLC43A2</i>      | 0.0034  | -1.5        | 1.03                      | -1.45                     |
| <i>CXorf65</i>      | 0.0023  | -2.24       | 1.49                      | -1.5                      | <i>IQCB1</i>        | 0.0074  | 1.61        | -1.39                     | 1.16                      | <i>MTAP</i>         | 0.0000  | 1.76        | -1.55                     | 1.13                      |
| <i>ITGA4</i>        | 0.0000  | -1.79       | 1.33                      | -1.34                     | <i>TTC24</i>        | 0.0017  | -1.51       | 1.12                      | -1.35                     | <i>MAP3K14</i>      | 0.0024  | -1.71       | 1.11                      | -1.54                     |
| <i>LITAF</i>        | 0.0004  | -1.83       | 1.35                      | -1.36                     | <i>MZT1</i>         | 0.0034  | 1.55        | -1.37                     | 1.14                      | <i>SETD7</i>        | 0.0001  | 2.43        | -1.79                     | 1.36                      |

| Genes        | P-value | Fold Change |                           |                           | Genes        | P-value | Fold Change |                           |                           | Genes         | P-value | Fold Change |                           |                           |
|--------------|---------|-------------|---------------------------|---------------------------|--------------|---------|-------------|---------------------------|---------------------------|---------------|---------|-------------|---------------------------|---------------------------|
|              |         | 28z vs BB-z | 28-AIL2RB-z (YXXQ) vs 28z | 28-AIL2RB-z (YXXQ) vs BBz |              |         | 28z vs BB-z | 28-AIL2RB-z (YXXQ) vs 28z | 28-AIL2RB-z (YXXQ) vs BBz |               |         | 28z vs BB-z | 28-AIL2RB-z (YXXQ) vs 28z | 28-AIL2RB-z (YXXQ) vs BBz |
| LYSM2        | 0.0011  | -1.54       | 1.05                      | -1.48                     | MARS         | 0.0019  | 2.22        | -2.02                     | 1.1                       | LOC100128364  | 0.0023  | -1.32       | -1.17                     | -1.54                     |
| C14orf105    | 0.0033  | 1.76        | -1.56                     | 1.13                      | SLC1A5       | 0.0023  | 2.48        | -2.1                      | 1.18                      | MPZL2         | 0.0041  | 1.46        | -1.61                     | -1.1                      |
| SLC39A14     | 0.0005  | 1.8         | -1.57                     | 1.14                      | OLMALINC     | 0.0007  | 1.99        | -1.95                     | 1.02                      | PDCD2L        | 0.0040  | 1.33        | -1.55                     | -1.16                     |
| ZMIZ2        | 0.0000  | -1.72       | 1.11                      | -1.55                     | C5orf28      | 0.0000  | 2.07        | -2                        | 1.04                      | SPAG1         | 0.0018  | 1.4         | -1.58                     | -1.13                     |
| CBS          | 0.0014  | 1.89        | -1.61                     | 1.17                      | TUBE1        | 0.0001  | 2.64        | -2.18                     | 1.21                      | TRGV10        | 0.0001  | -1.48       | -1.09                     | -1.62                     |
| LOC105378019 | 0.0054  | -1.91       | 1.18                      | -1.62                     | ATF3         | 0.0035  | 2.21        | -2.06                     | 1.08                      | NAGK          | 0.0000  | -1.63       | -1.03                     | -1.69                     |
| CCDC159      | 0.0007  | -1.54       | 1.04                      | -1.49                     | ENPP3        | 0.0076  | -1.99       | 1                         | -1.98                     | REL           | 0.0032  | -1.35       | -1.16                     | -1.56                     |
| PUM3         | 0.0009  | 1.51        | -1.47                     | 1.02                      | P2RY14       | 0.0001  | -3.35       | 1.4                       | -2.39                     | STRADB        | 0.0029  | 1.28        | -1.53                     | -1.19                     |
| CEBPG        | 0.0028  | 1.87        | -1.61                     | 1.16                      | CRTAM        | 0.0001  | -2.29       | 1.09                      | -2.11                     | BSPRY         | 0.0010  | 1.43        | -1.6                      | -1.12                     |
| CD38         | 0.0018  | -1.55       | 1.04                      | -1.5                      | PSAT1        | 0.0014  | 2.99        | -2.33                     | 1.28                      | MAPKAPK3      | 0.0014  | 1.69        | -1.72                     | -1.01                     |
| MIR4789      | 0.0007  | 1.58        | -1.51                     | 1.05                      | COL6A1       | 0.0017  | 2.41        | 1.1                       | -2.19                     | CPXMI         | 0.0016  | 1.22        | -1.5                      | -1.23                     |
| SPECC1L      | 0.0001  | 1.51        | -1.48                     | 1.02                      | ASNS         | 0.0008  | 3.02        | -2.37                     | 1.27                      | DGKI          | 0.0025  | -1.42       | -1.13                     | -1.6                      |
| ORAI2        | 0.0033  | -1.82       | 1.14                      | -1.6                      | CHRM3        | 0.0060  | 2.84        | -2.33                     | 1.22                      | TRIM44        | 0.0011  | -1.26       | -1.21                     | -1.52                     |
| GBP4         | 0.0000  | -2.3        | 1.3                       | -1.77                     | CD79A        | 0.0022  | -2.72       | 1.18                      | -2.3                      | TESPA1        | 0.0010  | -1.63       | -1.04                     | -1.7                      |
| LOC101928152 | 0.0058  | -1.58       | 1.04                      | -1.51                     | LAPTM4B      | 0.0006  | 2.24        | -2.16                     | 1.04                      | GOLGA8R       | 0.0025  | 1.43        | -1.61                     | -1.13                     |
| SPRYD7       | 0.0029  | 1.62        | -1.53                     | 1.06                      | ELOVL6       | 0.0000  | 2.23        | -2.16                     | 1.03                      | SAMSN1        | 0.0026  | 1.28        | -1.54                     | -1.2                      |
| VEGFA        | 0.0000  | 2.62        | -1.87                     | 1.4                       | SLCO4C1      | 0.0028  | 3.06        | -2.41                     | 1.27                      | CMSS1         | 0.0017  | 1.72        | -1.74                     | -1.01                     |
| KIF21B       | 0.0023  | 1.68        | -1.56                     | 1.08                      | PMAIP1       | 0.0001  | 2.55        | -2.27                     | 1.12                      | WJ2-87327B8.2 | 0.0013  | 4.55        | -3.91                     | 1.16                      |
| MT1CP        | 0.0005  | -1.64       | 1.06                      | -1.55                     | GPAT3        | 0.0005  | 2.35        | -2.24                     | 1.05                      | ATP1B1        | 0.0001  | 1.48        | -1.64                     | -1.11                     |
| CXCL8        | 0.0034  | 1.52        | -1.51                     | 1.01                      | SLC7A11      | 0.0008  | 4.73        | -2.87                     | 1.65                      | ELMSAN1       | 0.0088  | -1.47       | -1.11                     | -1.64                     |
| IARS         | 0.0009  | 1.56        | -1.52                     | 1.02                      | IGF1         | 0.0003  | 2.31        | -2.28                     | 1.01                      | EPS8          | 0.0009  | 1.41        | -1.61                     | -1.14                     |
| PTGER4       | 0.0002  | -1.93       | 1.16                      | -1.66                     | GPT2         | 0.0003  | 2.47        | -2.41                     | 1.02                      | SLC29A3       | 0.0023  | -1.24       | -1.23                     | -1.52                     |
| SLC7A5P1     | 0.0045  | 1.51        | -1.5                      | 1                         | OSBPL6       | 0.0049  | 2.66        | -2.48                     | 1.07                      | SYNE3         | 0.0022  | 1.42        | -1.61                     | -1.14                     |
| LOC105371220 | 0.0013  | -2.92       | 1.47                      | -1.98                     | HLA-DQA1     | 0.0027  | -2.87       | 1.11                      | -2.59                     | TUBB6         | 0.0077  | 1.34        | -1.57                     | -1.18                     |
| ASCL4        | 0.0031  | -1.61       | 1.03                      | -1.56                     | LOC284561    | 0.0022  | 3.7         | -3.29                     | 1.12                      | MFHASI        | 0.0015  | 1.44        | -1.63                     | -1.13                     |
| FAM129B      | 0.0027  | 1.96        | -1.69                     | 1.16                      | KIAA1324     | 0.0004  | -4.65       | 1.31                      | -3.56                     | MIR4725       | 0.0051  | -1.37       | -1.16                     | -1.6                      |
| ICOSLG       | 0.0027  | -1.58       | 1.02                      | -1.55                     | LOC102723766 | 0.0033  | -3.55       | 1.05                      | -3.39                     | PDLIM7        | 0.0014  | 1.45        | -1.63                     | -1.13                     |
| MLST8        | 0.0044  | 1.63        | -1.57                     | 1.04                      | LMO4         | 0.0006  | 1.49        | -1.5                      | -1.01                     | ABCC1         | 0.0012  | -1.29       | -1.21                     | -1.56                     |
| PCK2         | 0.0076  | 2.19        | -1.77                     | 1.24                      | C2orf197     | 0.0033  | 1.5         | -1.52                     | -1.01                     | PRKCA         | 0.0049  | 1.33        | -1.58                     | -1.19                     |
| POLR3G       | 0.0016  | 2.26        | -1.79                     | 1.26                      | SFXN1        | 0.0001  | 1.45        | -1.5                      | -1.04                     | CARS          | 0.0036  | 1.75        | -1.77                     | -1.01                     |
| LOC105373862 | 0.0017  | -2.59       | 1.36                      | -1.9                      | TRAV1-2      | 0.0032  | -1.47       | -1.03                     | -1.51                     | LOC101928140  | 0.0032  | -1.7        | -1.03                     | -1.75                     |
| ANKRD11      | 0.0006  | 1.56        | -1.55                     | 1.01                      | CCDC58       | 0.0034  | 1.46        | -1.51                     | -1.04                     | RRP12         | 0.0041  | 1.63        | -1.72                     | -1.06                     |
| CD74         | 0.0007  | -1.56       | 1.01                      | -1.55                     | GPR15        | 0.0050  | -1.45       | -1.04                     | -1.51                     | CASP3         | 0.0032  | 1.31        | -1.58                     | -1.2                      |
| SAMD10       | 0.0007  | -1.92       | 1.14                      | -1.68                     | GYP4         | 0.0005  | 1.42        | -1.5                      | -1.06                     | P2RY10        | 0.0019  | -1.61       | -1.07                     | -1.73                     |
| ASS1         | 0.0021  | 1.77        | -1.63                     | 1.08                      | ARID3B       | 0.0003  | 1.51        | -1.55                     | -1.03                     | GJB2          | 0.0001  | 1.24        | -1.55                     | -1.25                     |
| PRDM2        | 0.0001  | -1.81       | 1.09                      | -1.65                     | DNAJC6       | 0.0010  | 1.51        | -1.55                     | -1.03                     | IRF2BPL       | 0.0001  | 1.39        | -1.63                     | -1.17                     |
| SLC7A1       | 0.0010  | 2.08        | -1.75                     | 1.19                      | FBXO22       | 0.0028  | 1.46        | -1.53                     | -1.05                     | MBTPS2        | 0.0012  | 1.29        | -1.58                     | -1.22                     |
| ATXN7L1      | 0.0007  | -1.87       | 1.11                      | -1.68                     | MYBBP1A      | 0.0035  | 1.39        | -1.5                      | -1.08                     | USP22         | 0.0000  | 1.16        | -1.5                      | -1.3                      |
| CTDSPL       | 0.0023  | -2.53       | 1.33                      | -1.9                      | PHTF2        | 0.0061  | 1.57        | -1.58                     | -1.01                     | LOC105369785  | 0.0030  | 1.19        | -1.53                     | -1.28                     |
| ADAM9        | 0.0011  | 1.87        | -1.69                     | 1.11                      | ERII         | 0.0008  | 1.58        | -1.59                     | -1.01                     | SAMD4A        | 0.0093  | 1.29        | -1.58                     | -1.23                     |
| TIMM44       | 0.0011  | 2.11        | -1.77                     | 1.19                      | CL2orf37     | 0.0007  | -1.38       | -1.1                      | -1.51                     | TRPV3         | 0.0018  | -1.26       | -1.24                     | -1.57                     |
| RAB39B       | 0.0009  | 1.72        | -1.64                     | 1.05                      | RAD23A       | 0.0001  | 1.44        | -1.54                     | -1.07                     | GSTA4         | 0.0008  | 1.58        | -1.73                     | -1.09                     |
| GXYLT2       | 0.0000  | -8.47       | 2.62                      | -3.23                     | LINC00341    | 0.0006  | 1.5         | -1.57                     | -1.05                     | EEF2K         | 0.0040  | 1.18        | -1.53                     | -1.29                     |
| BCL2L11      | 0.0063  | -2.12       | 1.18                      | -1.8                      | ABCF2        | 0.0036  | 1.43        | -1.55                     | -1.08                     | TRPM2         | 0.0064  | 1.56        | -1.72                     | -1.11                     |
| SLC6A9       | 0.0019  | 2.75        | -2.01                     | 1.37                      | LINC01395    | 0.0046  | -1.37       | -1.11                     | -1.52                     | JARID2        | 0.0008  | -1.16       | -1.31                     | -1.52                     |
| CDR2         | 0.0006  | -1.65       | 1                         | -1.64                     | PACSN2       | 0.0004  | 1.46        | -1.56                     | -1.07                     | TNFSF13       | 0.0078  | 1.39        | -1.65                     | -1.18                     |
| EIF4EBP1     | 0.0004  | 2.32        | -1.89                     | 1.23                      | PAK1         | 0.0002  | 1.43        | -1.55                     | -1.09                     | C17orf51      | 0.0001  | 4.17        | -3.91                     | 1.07                      |
| GADD45A      | 0.0000  | 1.96        | -1.77                     | 1.11                      | ZMIZ1        | 0.0076  | -1.3        | -1.15                     | -1.5                      | XAF1          | 0.0003  | -1.79       | -1.02                     | -1.82                     |
| TRIB3        | 0.0083  | 2.24        | -1.86                     | 1.2                       | LOC100129203 | 0.0023  | -1.55       | -1.04                     | -1.61                     | HASI          | 0.0061  | -1.13       | -1.34                     | -1.5                      |
| PDE7A        | 0.0000  | -2.11       | 1.15                      | -1.84                     | VARS         | 0.0056  | 1.52        | -1.6                      | -1.05                     | IFIH1         | 0.0022  | -1.5        | -1.14                     | -1.71                     |
| STC2         | 0.0048  | 2.63        | -2.01                     | 1.31                      | SPATA5       | 0.0006  | 1.49        | -1.59                     | -1.06                     | IRF2BP2       | 0.0021  | -1.44       | -1.17                     | -1.69                     |
| NEDD9        | 0.0011  | 1.84        | -1.75                     | 1.05                      | UGCG         | 0.0041  | 1.52        | -1.6                      | -1.06                     | TNFRSF10B     | 0.0054  | 1.46        | -1.7                      | -1.16                     |
| IL2RA        | 0.0000  | 2.1         | -1.84                     | 1.14                      | ARHGEF9      | 0.0007  | -1.3        | -1.16                     | -1.5                      | ARSB          | 0.0023  | 1.67        | -1.79                     | -1.07                     |
| SIRT1        | 0.0001  | 2.15        | -1.87                     | 1.15                      | RNASEK       | 0.0005  | -1.46       | -1.08                     | -1.58                     | NFIL3         | 0.0001  | 1.56        | -1.75                     | -1.12                     |
| LGALS9C      | 0.0006  | -1.78       | 1.02                      | -1.75                     | GFP1         | 0.0054  | 1.57        | -1.63                     | -1.04                     | KLHL2         | 0.0008  | 1.45        | -1.7                      | -1.17                     |
| VLDLR        | 0.0006  | 4.31        | -2.48                     | 1.74                      | CRY1         | 0.0021  | 1.45        | -1.58                     | -1.09                     | PLCB1         | 0.0079  | 1.26        | -1.6                      | -1.27                     |
| GPR55        | 0.0022  | -2.05       | 1.11                      | -1.85                     | LOC102725168 | 0.0046  | 1.35        | -1.53                     | -1.14                     | SERTAD2       | 0.0002  | -1.13       | -1.35                     | -1.52                     |
| XPO5         | 0.0001  | 1.76        | -1.75                     | 1                         | NEK7         | 0.0000  | 1.34        | -1.53                     | -1.14                     | ELL2          | 0.0008  | 1.16        | -1.55                     | -1.33                     |
| MTHFD1L      | 0.0000  | 2.25        | -1.94                     | 1.16                      | HEMK1        | 0.0014  | 1.56        | -1.63                     | -1.05                     | NFKB1         | 0.0004  | -1.17       | -1.33                     | -1.55                     |
| GPRI74       | 0.0003  | -1.82       | 1.01                      | -1.8                      | RERE         | 0.0030  | 1.46        | -1.59                     | -1.09                     | PLXNA1        | 0.0003  | 1.18        | -1.56                     | -1.32                     |
| NLN          | 0.0062  | 1.95        | -1.85                     | 1.05                      | DNAAF5       | 0.0025  | 1.29        | -1.51                     | -1.18                     | SSBP3         | 0.0003  | 1.18        | -1.56                     | -1.32                     |
| TSPAN33      | 0.0084  | -1.98       | 1.06                      | -1.87                     | FASN         | 0.0034  | 1.47        | -1.6                      | -1.09                     | STAM          | 0.0006  | -1.1        | -1.37                     | -1.51                     |
| TSPAN2       | 0.0001  | -4.72       | 1.8                       | -2.63                     | MDC1         | 0.0002  | -1.43       | -1.11                     | -1.58                     | TGFBR1        | 0.0058  | 1.27        | -1.61                     | -1.27                     |
| LOC102723769 | 0.0036  | -2.08       | 1.08                      | -1.92                     | STK40        | 0.0093  | 1.51        | -1.62                     | -1.08                     | PSTPIP2       | 0.0007  | 1.38        | -1.68                     | -1.21                     |
| SPINK2       | 0.0009  | -1.95       | 1.03                      | -1.89                     | BMF          | 0.0051  | -1.27       | -1.19                     | -1.51                     | AARS          | 0.0034  | 1.79        | -1.85                     | -1.04                     |
| DLGAP1       | 0.0013  | 2.53        | -2.08                     | 1.21                      | KBTBD8       | 0.0061  | 1.62        | -1.67                     | -1.04                     | GOLGA8O       | 0.0005  | 1.65        | -1.8                      | -1.09                     |
| CTH          | 0.0002  | 7.5         | -3.21                     | 2.33                      | TRGV3        | 0.0016  | -1.58       | -1.05                     | -1.66                     | LOC105373212  | 0.0021  | -1.66       | -1.09                     | -1.8                      |
| SLC28A3      | 0.0005  | -2.46       | 1.19                      | -2.08                     | FAM126A      | 0.0002  | 1.24        | -1.5                      | -1.21                     | CDKL1         | 0.0010  | -1.18       | -1.32                     | -1.57                     |

| Genes        | P-value | Fold Change |                           |                           | Genes        | P-value | Fold Change |                           |                           | Genes        | P-value | Fold Change |                           |                           |
|--------------|---------|-------------|---------------------------|---------------------------|--------------|---------|-------------|---------------------------|---------------------------|--------------|---------|-------------|---------------------------|---------------------------|
|              |         | 28z vs BB-z | 28-AIL2RB-z (YXXQ) vs 28z | 28-AIL2RB-z (YXXQ) vs BBz |              |         | 28z vs BB-z | 28-AIL2RB-z (YXXQ) vs 28z | 28-AIL2RB-z (YXXQ) vs BBz |              |         | 28z vs BB-z | 28-AIL2RB-z (YXXQ) vs 28z | 28-AIL2RB-z (YXXQ) vs BBz |
| MAP2K1       | 0.0004  | 1.38        | -1.68                     | -1.22                     | ITPKB        | 0.0009  | -1.68       | -1.15                     | -1.93                     | UNC119       | 0.0023  | -1.12       | -1.6                      | -1.8                      |
| MDF1C        | 0.0002  | 1.33        | -1.65                     | -1.25                     | FLNA         | 0.0007  | -1.18       | -1.41                     | -1.67                     | HTATSF1      | 0.0001  | 1.47        | -2.03                     | -1.38                     |
| MESDC1       | 0.0002  | 1.38        | -1.68                     | -1.22                     | HIVEP1       | 0.0006  | -1.49       | -1.24                     | -1.84                     | LTA          | 0.0021  | 1.62        | -2.11                     | -1.3                      |
| TTC7A        | 0.0011  | -1.32       | -1.25                     | -1.65                     | KDELC1       | 0.0006  | 1.12        | -1.63                     | -1.45                     | SNN          | 0.0005  | -1.03       | -1.68                     | -1.73                     |
| INPP5F       | 0.0013  | -1.51       | -1.16                     | -1.75                     | LOC102724745 | 0.0036  | -5.39       | 1.24                      | -4.34                     | TFEC         | 0.0054  | 1.98        | -2.27                     | -1.15                     |
| SLC4A4       | 0.0063  | 1.65        | -1.81                     | -1.1                      | DENND4A      | 0.0001  | -1.17       | -1.43                     | -1.67                     | DCUNID3      | 0.0031  | 2.18        | -2.35                     | -1.08                     |
| COL5A2       | 0.0006  | 1.35        | -1.67                     | -1.24                     | PDE4B        | 0.0004  | 1.5         | -1.86                     | -1.24                     | ENTPDI       | 0.0043  | -1.22       | -1.55                     | -1.89                     |
| LINC01518    | 0.0083  | 1.06        | -1.5                      | -1.41                     | SNX10        | 0.0003  | 1.33        | -1.77                     | -1.33                     | FGFR1        | 0.0004  | -1.51       | -1.37                     | -2.07                     |
| TRIP10       | 0.0004  | 1.17        | -1.57                     | -1.34                     | ZNF827       | 0.0034  | -1.48       | -1.25                     | -1.85                     | TAGAP        | 0.0018  | -1.18       | -1.58                     | -1.86                     |
| EIF4G3       | 0.0000  | 1.51        | -1.75                     | -1.17                     | PPID         | 0.0000  | 1.83        | -2.01                     | -1.1                      | BCL2A1       | 0.0018  | 1.22        | -1.9                      | -1.56                     |
| ADO          | 0.0013  | -1.23       | -1.31                     | -1.61                     | DOCK5        | 0.0002  | -1.65       | -1.18                     | -1.95                     | EPB41LAB     | 0.0020  | -1.24       | -1.54                     | -1.92                     |
| MICAL2       | 0.0017  | 1.12        | -1.54                     | -1.38                     | IL2          | 0.0051  | 1.14        | -1.67                     | -1.46                     | FDX1         | 0.0002  | -1          | -1.73                     | -1.73                     |
| OAS3         | 0.0008  | -1.23       | -1.31                     | -1.61                     | MAPK8        | 0.0046  | 1.33        | -1.79                     | -1.34                     | GOLGA8Q      | 0.0010  | 1.79        | -2.22                     | -1.24                     |
| RALB         | 0.0000  | 1.31        | -1.66                     | -1.27                     | PRAMEF9      | 0.0023  | -1.18       | -1.44                     | -1.69                     | TNFAIP3      | 0.0001  | -1.52       | -1.37                     | -2.09                     |
| RIMKLB       | 0.0042  | -1.37       | -1.24                     | -1.69                     | PDE4A        | 0.0050  | 1.09        | -1.64                     | -1.5                      | AHR          | 0.0000  | 1.38        | -2.01                     | -1.45                     |
| C4orf32      | 0.0030  | 1.13        | -1.56                     | -1.37                     | CETN4P       | 0.0088  | -1.91       | -1.08                     | -2.06                     | LGALS9B      | 0.0009  | -2.37       | -1.03                     | -2.44                     |
| CSNK1G3      | 0.0002  | -1.14       | -1.37                     | -1.56                     | IGLV3-21     | 0.0011  | -1.02       | -1.56                     | -1.59                     | NCALD        | 0.0030  | -1.33       | -1.49                     | -1.99                     |
| GPATCH4      | 0.0000  | 1.33        | -1.68                     | -1.26                     | FOXPI        | 0.0005  | -1.33       | -1.35                     | -1.8                      | SPRY1        | 0.0008  | 1.49        | -2.08                     | -1.4                      |
| PIGV         | 0.0022  | 1.12        | -1.55                     | -1.39                     | CSF2RB       | 0.0044  | 1           | -1.58                     | -1.58                     | TRAF1        | 0.0002  | -2.44       | -1.01                     | -2.47                     |
| CXCR4        | 0.0020  | 1.11        | -1.55                     | -1.4                      | ANK2         | 0.0001  | 1.49        | -1.89                     | -1.27                     | FGF2         | 0.0003  | 1.18        | -1.89                     | -1.6                      |
| IQGAP3       | 0.0071  | 1.21        | -1.61                     | -1.34                     | SORT1        | 0.0058  | 1.14        | -1.68                     | -1.48                     | SOCS2        | 0.0030  | 1.98        | -2.33                     | -1.17                     |
| PLEKHO1      | 0.0024  | -1.16       | -1.37                     | -1.58                     | NTRK2        | 0.0018  | 1.12        | -1.68                     | -1.5                      | LINC00599    | 0.0046  | 1.04        | -1.79                     | -1.73                     |
| SUPT4H1      | 0.0022  | -1.06       | -1.43                     | -1.52                     | LOC105375670 | 0.0017  | 1.49        | -1.9                      | -1.28                     | TNIP1        | 0.0006  | -1.22       | -1.59                     | -1.93                     |
| PRPSAP2      | 0.0011  | 1.66        | -1.85                     | -1.11                     | NCR2         | 0.0001  | -1.24       | -1.42                     | -1.76                     | SPIN1        | 0.0000  | 1.38        | -2.04                     | -1.48                     |
| NEAT5        | 0.0006  | -1.1        | -1.41                     | -1.55                     | RAB8B        | 0.0004  | -1.01       | -1.58                     | -1.6                      | NCR3         | 0.0019  | 1.52        | -2.13                     | -1.4                      |
| PTPN6        | 0.0010  | -1.18       | -1.36                     | -1.6                      | APOBEC3H     | 0.0088  | -1.05       | -1.56                     | -1.64                     | SHC4         | 0.0022  | 1.87        | -2.3                      | -1.23                     |
| SLC7A14      | 0.0039  | 1.15        | -1.58                     | -1.38                     | SYPL1        | 0.0003  | -1.05       | -1.56                     | -1.64                     | EMP1         | 0.0014  | 1.9         | -2.31                     | -1.22                     |
| STARD4       | 0.0005  | 1.41        | -1.73                     | -1.23                     | USP44        | 0.0004  | 1.99        | -2.13                     | -1.07                     | MMD          | 0.0001  | 1.13        | -1.88                     | -1.66                     |
| LZTS1        | 0.0005  | 1.58        | -1.82                     | -1.15                     | LOC105371281 | 0.0076  | 1.05        | -1.64                     | -1.57                     | TEX30        | 0.0004  | 1.13        | -1.88                     | -1.67                     |
| RBPJ         | 0.0000  | -1.14       | -1.39                     | -1.59                     | PFND2        | 0.0000  | 1.63        | -1.99                     | -1.22                     | BATF3        | 0.0005  | 2.06        | -2.41                     | -1.17                     |
| B3GALNT1     | 0.0027  | 1.58        | -1.83                     | -1.16                     | TRAV24       | 0.0005  | -1.35       | -1.37                     | -1.84                     | CREM         | 0.0000  | 2.01        | -2.39                     | -1.19                     |
| GOLGA8N      | 0.0008  | 1.6         | -1.84                     | -1.15                     | FILIPIL      | 0.0019  | 1.13        | -1.71                     | -1.51                     | GJB6         | 0.0018  | 1.54        | -2.17                     | -1.41                     |
| NCF2         | 0.0060  | -1.96       | -1.01                     | -1.98                     | PTGER2       | 0.0029  | 1.74        | -2.04                     | -1.18                     | PBLD         | 0.0062  | -1.02       | -1.78                     | -1.81                     |
| CASP10       | 0.0022  | 1.17        | -1.61                     | -1.38                     | SEC61A2      | 0.0008  | -1.3        | -1.4                      | -1.82                     | RAB1FIP1     | 0.0000  | 1.62        | -2.22                     | -1.37                     |
| CYFIP1       | 0.0044  | -1.03       | -1.47                     | -1.52                     | TRAK2        | 0.0019  | 1.44        | -1.9                      | -1.32                     | BCL2         | 0.0000  | 2.17        | -2.46                     | -1.14                     |
| LOC339192    | 0.0043  | -1.3        | -1.3                      | -1.69                     | NAB2         | 0.0028  | -1.14       | -1.51                     | -1.73                     | DENND5A      | 0.0000  | -1.62       | -1.37                     | -2.23                     |
| RILPL2       | 0.0000  | -1.04       | -1.47                     | -1.53                     | MINA         | 0.0001  | 1.95        | -2.15                     | -1.1                      | NEK6         | 0.0032  | 1.15        | -1.93                     | -1.68                     |
| ZFH3         | 0.0061  | -1.25       | -1.33                     | -1.62                     | PHLDA1       | 0.0030  | 1.42        | -1.91                     | -1.34                     | FLNB         | 0.0004  | -1.47       | -1.46                     | -2.15                     |
| GOT1         | 0.0014  | 1.83        | -1.95                     | -1.06                     | ETS2         | 0.0008  | 1.16        | -1.76                     | -1.51                     | LYST         | 0.0001  | -1.64       | -1.37                     | -2.24                     |
| LOC105377022 | 0.0037  | -1.69       | -1.12                     | -1.89                     | TRAF4        | 0.0037  | -1.34       | -1.4                      | -1.88                     | LOC105373211 | 0.0022  | -2.38       | -1.07                     | -2.55                     |
| EPB41L2      | 0.0026  | -1.54       | -1.19                     | -1.83                     | CASS4        | 0.0005  | -1.73       | -1.2                      | -2.08                     | ENPP6        | 0.0028  | 1.96        | -2.4                      | -1.23                     |
| AGK          | 0.0004  | -1.1        | -1.44                     | -1.58                     | SLAMF1       | 0.0002  | 1.69        | -2.06                     | -1.22                     | KAT2B        | 0.0002  | 2.23        | -2.51                     | -1.12                     |
| DSTYK        | 0.0017  | 1.43        | -1.78                     | -1.24                     | ITPR1        | 0.0000  | 1.15        | -1.76                     | -1.53                     | SH2D2A       | 0.0001  | 1.1         | -1.9                      | -1.73                     |
| IGKC         | 0.0004  | -1.49       | -1.21                     | -1.81                     | POU2F2       | 0.0073  | 1.1         | -1.72                     | -1.57                     | TNFRSF11A    | 0.0040  | 1.65        | -2.26                     | -1.37                     |
| ETV4         | 0.0007  | 1.65        | -1.89                     | -1.14                     | GATA3        | 0.0001  | -1.43       | -1.36                     | -1.95                     | BHLHE40      | 0.0001  | -1.11       | -1.73                     | -1.91                     |
| TLE4         | 0.0001  | -1.66       | -1.14                     | -1.89                     | MOB3B        | 0.0016  | 1.98        | -2.2                      | -1.11                     | PTPN14       | 0.0002  | 2.27        | -2.53                     | -1.11                     |
| ASB2         | 0.0051  | -1.74       | -1.1                      | -1.93                     | ADPRH        | 0.0067  | -1.09       | -1.59                     | -1.73                     | RHEBL1       | 0.0016  | 2.11        | -2.47                     | -1.17                     |
| GNPTAB       | 0.0000  | 1.52        | -1.83                     | -1.2                      | IRF4         | 0.0002  | 1.21        | -1.82                     | -1.5                      | CTTNBP2NL    | 0.0009  | -2.31       | -1.1                      | -2.55                     |
| MBNL2        | 0.0029  | 1.5         | -1.82                     | -1.21                     | PLEKHA1      | 0.0010  | -1.52       | -1.32                     | -2                        | ENOX1        | 0.0087  | -1.88       | -1.27                     | -2.38                     |
| NT5E         | 0.0038  | -1.9        | -1.05                     | -1.98                     | APBB2        | 0.0001  | 1.62        | -2.06                     | -1.27                     | SASH1        | 0.0012  | 1.44        | -2.15                     | -1.5                      |
| ASXL2        | 0.0009  | 1.15        | -1.62                     | -1.41                     | CD44         | 0.0002  | -1.11       | -1.58                     | -1.75                     | C10orf128    | 0.0012  | 2.28        | -2.54                     | -1.11                     |
| LRIG1        | 0.0000  | -1.25       | -1.35                     | -1.68                     | GNAO1        | 0.0045  | 1.15        | -1.78                     | -1.55                     | DAPK1        | 0.0040  | -1.38       | -1.56                     | -2.14                     |
| PORCN        | 0.0001  | 1.31        | -1.72                     | -1.31                     | MIR4737      | 0.0034  | 1.31        | -1.89                     | -1.44                     | IER5         | 0.0032  | 1.14        | -1.97                     | -1.74                     |
| CISH         | 0.0002  | 5.76        | -4.36                     | 1.32                      | ARNTL2       | 0.0004  | 1.01        | -1.68                     | -1.66                     | LAYN         | 0.0001  | -1.11       | -1.76                     | -1.95                     |
| PRRT3        | 0.0060  | -1.74       | -1.11                     | -1.93                     | BCL2L1       | 0.0022  | 1.23        | -1.84                     | -1.5                      | STAP1        | 0.0000  | -1.67       | -1.39                     | -2.32                     |
| LOC101927952 | 0.0094  | 1.05        | -1.56                     | -1.48                     | DPYSL2       | 0.0072  | 1.14        | -1.78                     | -1.56                     | SNX9         | 0.0004  | -1.19       | -1.7                      | -2.02                     |
| MAP4K2       | 0.0001  | 1.08        | -1.58                     | -1.46                     | NFE2L1       | 0.0000  | 1.79        | -2.15                     | -1.2                      | SESN3        | 0.0003  | -1.98       | -1.25                     | -2.47                     |
| LOC101927497 | 0.0066  | 1.62        | -1.89                     | -1.16                     | PIP5K1B      | 0.0017  | 1.34        | -1.92                     | -1.43                     | DUSP5        | 0.0009  | 1.42        | -2.19                     | -1.54                     |
| ZNF704       | 0.0004  | 1.1         | -1.6                      | -1.45                     | RNUVI-3      | 0.0016  | 1.72        | -2.12                     | -1.23                     | FSCN1        | 0.0010  | -1.83       | -1.32                     | -2.41                     |
| CCL4L2       | 0.0023  | 1.69        | -1.92                     | -1.14                     | VCL          | 0.0009  | -1.18       | -1.54                     | -1.82                     | PSPH         | 0.0009  | 2.7         | -2.73                     | -1.01                     |
| POC1B        | 0.0042  | 1.71        | -1.93                     | -1.13                     | AHII         | 0.0001  | -1.56       | -1.31                     | -2.06                     | EGR2         | 0.0065  | -1.8        | -1.34                     | -2.41                     |
| CES4A        | 0.0011  | 1.35        | -1.76                     | -1.3                      | DFNA5        | 0.0074  | 1.64        | -2.09                     | -1.28                     | LRRN3        | 0.0001  | -1.25       | -1.67                     | -2.08                     |
| IL9R         | 0.0013  | -1.37       | -1.29                     | -1.77                     | IKZF4        | 0.0040  | 1.67        | -2.11                     | -1.26                     | RNF19B       | 0.0005  | -1.34       | -1.6                      | -2.15                     |
| WEE2         | 0.0005  | -1.12       | -1.44                     | -1.62                     | TMEM2        | 0.0003  | 1.24        | -1.87                     | -1.51                     | ZG16B        | 0.0000  | -1.64       | -1.42                     | -2.33                     |
| ERCC6        | 0.0007  | -2.02       | -1.02                     | -2.05                     | IKZF2        | 0.0000  | -2.35       | -1.01                     | -2.38                     | HVCN1        | 0.0021  | -1.31       | -1.63                     | -2.13                     |
| PRKD2        | 0.0016  | 1.16        | -1.65                     | -1.42                     | CAPG         | 0.0008  | -1.02       | -1.69                     | -1.71                     | KIF3A        | 0.0000  | 1.68        | -2.35                     | -1.41                     |
| PKD1L3       | 0.0005  | 1.36        | -1.77                     | -1.3                      | GNG4         | 0.0020  | -2.38       | -1.01                     | -2.39                     | TBC1D4       | 0.0000  | 1.54        | -2.28                     | -1.48                     |
| WWC3         | 0.0005  | -1.42       | -1.27                     | -1.8                      | MIB1         | 0.0000  | 1.57        | -2.08                     | -1.32                     | SFT2D1       | 0.0047  | 1.16        | -2.03                     | -1.75                     |

| Genes               | P-value | Fold Change |                           |                           | Genes               | P-value | Fold Change |                           |                           |
|---------------------|---------|-------------|---------------------------|---------------------------|---------------------|---------|-------------|---------------------------|---------------------------|
|                     |         | 28z vs BB-z | 28-AIL2RB-z (YXXQ) vs 28z | 28-AIL2RB-z (YXXQ) vs BBz |                     |         | 28z vs BB-z | 28-AIL2RB-z (YXXQ) vs 28z | 28-AIL2RB-z (YXXQ) vs BBz |
| <i>CTSH</i>         | 0.0028  | 1.25        | -2.1                      | -1.68                     | <i>NR4A2</i>        | 0.0001  | -1.29       | -2.05                     | -2.66                     |
| <i>SMOX</i>         | 0.0069  | 1.85        | -2.45                     | -1.33                     | <i>NHS</i>          | 0.0000  | -1.38       | -2                        | -2.75                     |
| <i>IVNSIABP</i>     | 0.0005  | 2.5         | -2.71                     | -1.08                     | <i>ZDHHC14</i>      | 0.0001  | -1.54       | -1.88                     | -2.89                     |
| <i>LOC105372832</i> | 0.0035  | -2.17       | -1.2                      | -2.59                     | <i>CD82</i>         | 0.0008  | -2.04       | -1.57                     | -3.2                      |
| <i>APBA1</i>        | 0.0062  | 2.13        | -2.59                     | -1.21                     | <i>ACTN1</i>        | 0.0007  | 1.31        | -2.76                     | -2.11                     |
| <i>LOC102725065</i> | 0.0021  | -2.16       | -1.21                     | -2.61                     | <i>SOGA3</i>        | 0.0022  | 1.54        | -3.02                     | -1.96                     |
| <i>CABLES1</i>      | 0.0003  | -1.86       | -1.34                     | -2.48                     | <i>KIAA1147</i>     | 0.0000  | -1.14       | -2.34                     | -2.68                     |
| <i>LOC105370775</i> | 0.0016  | -2.68       | -1.04                     | -2.79                     | <i>MB21D2</i>       | 0.0000  | 2.36        | -3.55                     | -1.5                      |
| <i>NETO2</i>        | 0.0014  | 1.91        | -2.51                     | -1.32                     | <i>MIR146A</i>      | 0.0057  | -1.44       | -2.08                     | -2.99                     |
| <i>TRIB1</i>        | 0.0001  | -1.21       | -1.75                     | -2.11                     | <i>LOC100129034</i> | 0.0011  | 1.19        | -2.76                     | -2.33                     |
| <i>ANXA3</i>        | 0.0005  | 2.11        | -2.62                     | -1.24                     | <i>STX3</i>         | 0.0004  | 3.84        | -4.04                     | -1.05                     |
| <i>FOXP3</i>        | 0.0020  | 1.8         | -2.49                     | -1.38                     | <i>TLR5</i>         | 0.0001  | -7.36       | 1.17                      | -6.29                     |
| <i>SH2B3</i>        | 0.0001  | 1.55        | -2.36                     | -1.52                     | <i>LOC105376626</i> | 0.0022  | -2.01       | -1.71                     | -3.44                     |
| <i>NDFIP2</i>       | 0.0002  | 1.81        | -2.5                      | -1.38                     | <i>NELL2</i>        | 0.0000  | -3.09       | -1.26                     | -3.9                      |
| <i>SUSD4</i>        | 0.0025  | -2.74       | -1.04                     | -2.84                     | <i>CCL3L3</i>       | 0.0001  | 2.21        | -3.56                     | -1.61                     |
| <i>OSM</i>          | 0.0028  | 2.78        | -2.86                     | -1.03                     | <i>PLCH1</i>        | 0.0026  | 2.14        | -3.52                     | -1.65                     |
| <i>CDK6</i>         | 0.0000  | 1.63        | -2.43                     | -1.49                     | <i>NFKBIA</i>       | 0.0001  | -2.09       | -1.69                     | -3.53                     |
| <i>PTGIS</i>        | 0.0004  | 2.44        | -2.78                     | -1.14                     | <i>CEACAM1</i>      | 0.0006  | 2.58        | -3.86                     | -1.5                      |
| <i>CD109</i>        | 0.0042  | 1.84        | -2.57                     | -1.39                     | <i>BIRC3</i>        | 0.0001  | -2.19       | -1.68                     | -3.68                     |
| <i>KIT</i>          | 0.0007  | -1.66       | -1.49                     | -2.47                     | <i>RDH10</i>        | 0.0000  | 1.24        | -2.97                     | -2.4                      |
| <i>RASGRP3</i>      | 0.0001  | -2.58       | -1.11                     | -2.85                     | <i>MIR3142</i>      | 0.0010  | -1.89       | -1.89                     | -3.58                     |
| <i>TTN</i>          | 0.0000  | -2.6        | -1.1                      | -2.86                     | <i>MYO1E</i>        | 0.0000  | 1.5         | -3.28                     | -2.19                     |
| <i>IRF8</i>         | 0.0035  | 1.56        | -2.42                     | -1.55                     | <i>EGFL6</i>        | 0.0001  | 2.81        | -4.06                     | -1.45                     |
| <i>ARHGAP10</i>     | 0.0001  | -2.81       | -1.05                     | -2.94                     | <i>TNFRSF9</i>      | 0.0041  | 1.08        | -2.88                     | -2.68                     |
| <i>MYO3B</i>        | 0.0013  | 2.01        | -2.66                     | -1.33                     | <i>CCR2</i>         | 0.0087  | 1.22        | -3.06                     | -2.51                     |
| <i>YES1</i>         | 0.0002  | 2.39        | -2.83                     | -1.18                     | <i>TNFSF14</i>      | 0.0000  | 1.41        | -3.27                     | -2.32                     |
| <i>PLPP1</i>        | 0.0000  | 1.33        | -2.3                      | -1.73                     | <i>CSF2</i>         | 0.0011  | 1.03        | -2.87                     | -2.8                      |
| <i>HMSD</i>         | 0.0003  | -2.06       | -1.32                     | -2.72                     | <i>CXorf21</i>      | 0.0000  | -3.24       | -1.34                     | -4.35                     |
| <i>NRP2</i>         | 0.0012  | 1.23        | -2.23                     | -1.81                     | <i>LOC105370177</i> | 0.0007  | 1.46        | -3.38                     | -2.31                     |
| <i>CD68</i>         | 0.0003  | 1.94        | -2.67                     | -1.38                     | <i>HHLA2</i>        | 0.0000  | 3.43        | -4.44                     | -1.3                      |
| <i>CDCP1</i>        | 0.0003  | 1.39        | -2.35                     | -1.7                      | <i>XCL1</i>         | 0.0005  | 1.79        | -3.7                      | -2.07                     |
| <i>SOX4</i>         | 0.0000  | -2.44       | -1.18                     | -2.88                     | <i>HBEGF</i>        | 0.0000  | 4.67        | -4.77                     | -1.02                     |
| <i>KCNJ13</i>       | 0.0007  | -2.84       | -1.06                     | -3                        | <i>DUSP10</i>       | 0.0000  | -1.62       | -2.24                     | -3.63                     |
| <i>IL23A</i>        | 0.0045  | 1.06        | -2.09                     | -1.98                     | <i>IL5</i>          | 0.0002  | 2.65        | -4.36                     | -1.65                     |
| <i>ZBTB32</i>       | 0.0003  | 2.47        | -2.9                      | -1.18                     | <i>ULBP1</i>        | 0.0003  | 3.97        | -4.8                      | -1.21                     |
| <i>UNQ6494</i>      | 0.0008  | -1.18       | -1.89                     | -2.23                     | <i>HSPA4L</i>       | 0.0004  | 3.16        | -4.58                     | -1.45                     |
| <i>WHAMMP3</i>      | 0.0014  | -2.43       | -1.2                      | -2.92                     | <i>SDC4</i>         | 0.0000  | 1.16        | -3.28                     | -2.82                     |
| <i>TIGIT</i>        | 0.0019  | 1.31        | -2.34                     | -1.79                     | <i>LOC105374264</i> | 0.0015  | 1.15        | -3.31                     | -2.87                     |
| <i>SLC9A7</i>       | 0.0000  | 1.21        | -2.27                     | -1.88                     | <i>ARHGAP31</i>     | 0.0016  | -1.48       | -2.56                     | -3.79                     |
| <i>MLLT4</i>        | 0.0016  | 1.86        | -2.72                     | -1.46                     | <i>CRIM1</i>        | 0.0001  | 2.77        | -4.69                     | -1.69                     |
| <i>WARS</i>         | 0.0002  | 1.86        | -2.72                     | -1.46                     | <i>ABTB2</i>        | 0.0047  | 1.41        | -3.75                     | -2.66                     |
| <i>LINC01160</i>    | 0.0007  | -1.13       | -1.99                     | -2.24                     | <i>CHRNA6</i>       | 0.0001  | -10.93      | 1.39                      | -7.87                     |
| <i>RAB9A</i>        | 0.0004  | -1.83       | -1.5                      | -2.74                     | <i>CD83</i>         | 0.0002  | -1.24       | -2.89                     | -3.6                      |
| <i>AFAP1L2</i>      | 0.0019  | 1.33        | -2.43                     | -1.82                     | <i>DUSP6</i>        | 0.0003  | 2.86        | -4.86                     | -1.7                      |
| <i>CD70</i>         | 0.0008  | 1.19        | -2.31                     | -1.94                     | <i>PDE7B</i>        | 0.0002  | -3.22       | -1.57                     | -5.06                     |
| <i>SLC35F3</i>      | 0.0001  | 2.43        | -3.01                     | -1.24                     | <i>NFKB2</i>        | 0.0002  | -1.98       | -2.29                     | -4.53                     |
| <i>CLIC4</i>        | 0.0003  | 2.16        | -2.92                     | -1.36                     | <i>CD80</i>         | 0.0000  | 2.6         | -5.22                     | -2.01                     |
| <i>CDC42BPA</i>     | 0.0000  | 1.6         | -2.64                     | -1.65                     | <i>CCL22</i>        | 0.0046  | -1.13       | -3.54                     | -3.99                     |
| <i>BCL2L15</i>      | 0.0096  | -1.63       | -1.63                     | -2.67                     | <i>MIR155HG</i>     | 0.0001  | 1.89        | -5.06                     | -2.68                     |
| <i>CCND2</i>        | 0.0000  | 1.73        | -2.73                     | -1.58                     | <i>VCAM1</i>        | 0.0000  | -5.9        | -1.12                     | -6.62                     |
| <i>TIAM2</i>        | 0.0021  | -1.1        | -2.06                     | -2.27                     | <i>LINC00892</i>    | 0.0000  | 2.16        | -5.63                     | -2.6                      |
| <i>SPRED2</i>       | 0.0004  | 1.3         | -2.47                     | -1.9                      | <i>TREML2</i>       | 0.0002  | 4.6         | -6.77                     | -1.47                     |
| <i>CCDC141</i>      | 0.0000  | -2.24       | -1.36                     | -3.05                     | <i>DHRS3</i>        | 0.0001  | -1.11       | -3.96                     | -4.38                     |
| <i>MYO1B</i>        | 0.0002  | 2.9         | -3.29                     | -1.13                     | <i>TNFSF4</i>       | 0.0002  | -2.68       | -2.45                     | -6.57                     |
| <i>OLAH</i>         | 0.0040  | 2.75        | -3.24                     | -1.18                     | <i>CCR8</i>         | 0.0003  | -3.25       | -2.42                     | -7.88                     |
| <i>NR4A3</i>        | 0.0041  | -1.32       | -1.91                     | -2.52                     | <i>IER3</i>         | 0.0000  | 1.02        | -5.73                     | -5.64                     |
| <i>TP63</i>         | 0.0000  | -3.4        | -1.02                     | -3.45                     | <i>CD40LG</i>       | 0.0001  | 3.09        | -8.9                      | -2.88                     |
| <i>RGS1</i>         | 0.0009  | -3.19       | -1.07                     | -3.42                     | <i>DNAJC5B</i>      | 0.0000  | -8.02       | -1.31                     | -10.48                    |
| <i>RGS16</i>        | 0.0003  | 1.56        | -2.74                     | -1.76                     | <i>IL1A</i>         | 0.0025  | 5.3         | -10.15                    | -1.92                     |
| <i>DUSP4</i>        | 0.0002  | -1.62       | -1.73                     | -2.8                      | <i>DNAJC12</i>      | 0.0000  | 5.97        | -10.94                    | -1.83                     |
| <i>LOC728084</i>    | 0.0001  | 2.19        | -3.11                     | -1.42                     | <i>LIF</i>          | 0.0001  | 5.06        | -11.58                    | -2.29                     |
| <i>NFE2L3</i>       | 0.0006  | -1.31       | -1.98                     | -2.59                     | <i>HNF1B</i>        | 0.0006  | 1.89        | -10.11                    | -5.34                     |
| <i>IL13</i>         | 0.0001  | 2.42        | -3.26                     | -1.35                     | <i>XCL2</i>         | 0.0001  | -1.11       | -7.44                     | -8.3                      |
| <i>PTPRK</i>        | 0.0031  | 1.29        | -2.6                      | -2.01                     | <i>CCL1</i>         | 0.0000  | -6.62       | -2.13                     | -14.1                     |
| <i>MYBL1</i>        | 0.0002  | 1.93        | -3.04                     | -1.57                     | <i>SLC26A4</i>      | 0.0001  | 9.57        | -18.66                    | -1.95                     |
| <i>HLA-DQA2</i>     | 0.0024  | -2.98       | -1.16                     | -3.46                     |                     |         |             |                           |                           |
| <i>CCL4</i>         | 0.0004  | 2.1         | -3.14                     | -1.5                      |                     |         |             |                           |                           |
| <i>SERPINE2</i>     | 0.0001  | 2.08        | -3.18                     | -1.53                     |                     |         |             |                           |                           |



**Supplementary Table 3. Information for the NALM-6-bearing mice treated with CAR-T cells.**

|   | CAR gene<br>Infusion dose               | Overall survival<br>(days after leukemia infusion) | Cause of death | Signs of GVHD                                 |
|---|-----------------------------------------|----------------------------------------------------|----------------|-----------------------------------------------|
| 1 | 28-z<br>One infusion                    | 49                                                 | Leukemia       | None                                          |
| 2 |                                         | 46                                                 | Leukemia       | None                                          |
| 3 |                                         | 36                                                 | Leukemia       | None                                          |
| 4 |                                         | 39                                                 | Leukemia       | None                                          |
| 5 |                                         | 35                                                 | Leukemia       | None                                          |
| 6 |                                         | 32                                                 | Leukemia       | None                                          |
| 1 | BB-z<br>One infusion                    | 59                                                 | Leukemia       | None                                          |
| 2 |                                         | 42                                                 | Leukemia       | None                                          |
| 3 |                                         | 39                                                 | Leukemia       | None                                          |
| 4 |                                         | 41                                                 | Leukemia       | None                                          |
| 5 |                                         | 90 (Alive)                                         | NA             | None                                          |
| 6 |                                         | 61                                                 | Leukemia       | None                                          |
| 1 | 28-ΔIL2RB-<br>z (YXXQ)<br>One infusion  | 90 (Alive)                                         | NA             | None                                          |
| 2 |                                         | 90 (Alive)                                         | NA             | Fur loss and red skin                         |
| 3 |                                         | 90 (Alive)                                         | NA             | None                                          |
| 4 |                                         | 90 (Alive)                                         | NA             | None                                          |
| 5 |                                         | 90 (Alive)                                         | NA             | None                                          |
| 6 |                                         | 90 (Alive)                                         | NA             | None                                          |
| 1 | 28-z<br>Two infusions                   | 84                                                 | Leukemia       | None                                          |
| 2 |                                         | 90 (Alive)                                         | NA             | None                                          |
| 3 |                                         | 75                                                 | GVHD           | Weight loss (> 20%)                           |
| 4 |                                         | 54                                                 | GVHD           | Weight loss (> 20%)                           |
| 5 |                                         | 90 (Alive)                                         | NA             | None                                          |
| 6 |                                         | 61                                                 | Leukemia       | None                                          |
| 1 | BB-z<br>Two infusions                   | 90 (Alive)                                         | NA             | None                                          |
| 2 |                                         | 72                                                 | Leukemia       | None                                          |
| 3 |                                         | 85                                                 | GVHD           | Fur loss, red skin and<br>weight loss (> 20%) |
| 4 |                                         | 90 (Alive)                                         | NA             | None                                          |
| 5 |                                         | 90 (Alive)                                         | NA             | None                                          |
| 6 |                                         | 90 (Alive)                                         | NA             | None                                          |
| 1 | 28-ΔIL2RB-<br>z (YXXQ)<br>Two infusions | 90 (Alive)                                         | NA             | Fur loss and red skin                         |
| 2 |                                         | 88                                                 | GVHD           | Weight loss (> 20%)                           |
| 3 |                                         | 90 (Alive)                                         | NA             | Weight loss (> 10%)                           |
| 4 |                                         | 90 (Alive)                                         | NA             | None                                          |
| 5 |                                         | 90 (Alive)                                         | NA             | None                                          |
| 6 |                                         | 90 (Alive)                                         | NA             | None                                          |
